# Supplementary material for: Comparative Chloroplast Genome Analyses of Species in Gentiana section Cruciata (Gentianaceae) and the Development of Authentication Markers
Source: MDPI journal article supplement (doi:10.3390/ijms19071962), 2018-07-05
Supplement: s1 [file s1]

**A**

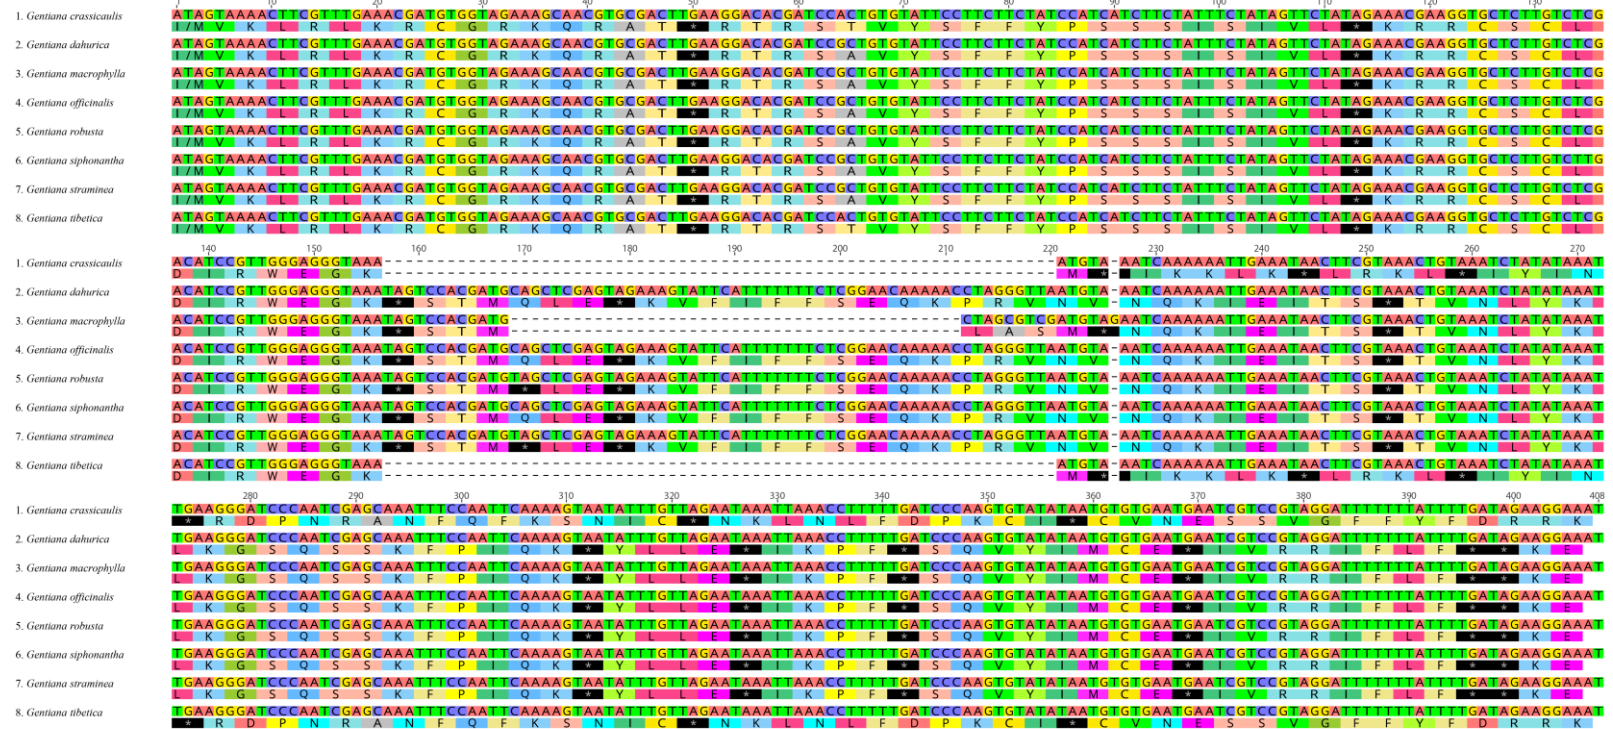

**B**

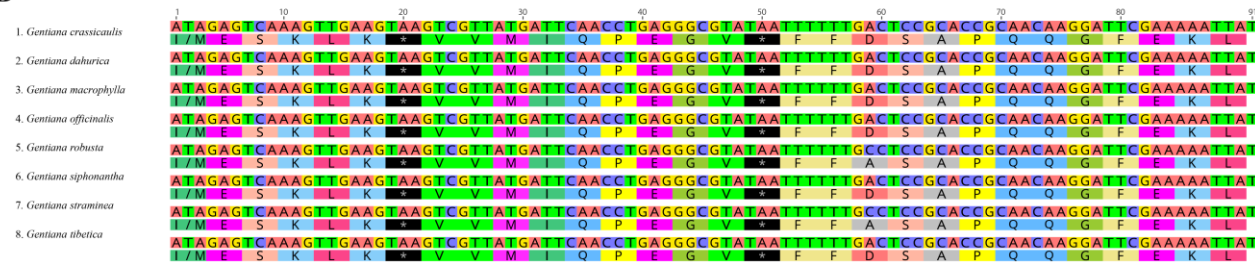

**Figure S1.** Alignment of two pseudogenes in the eight *Gentiana* species chloroplast genome. (A) *rps16*. (B) *infA*. The black box with an asterisk represents stop codons.

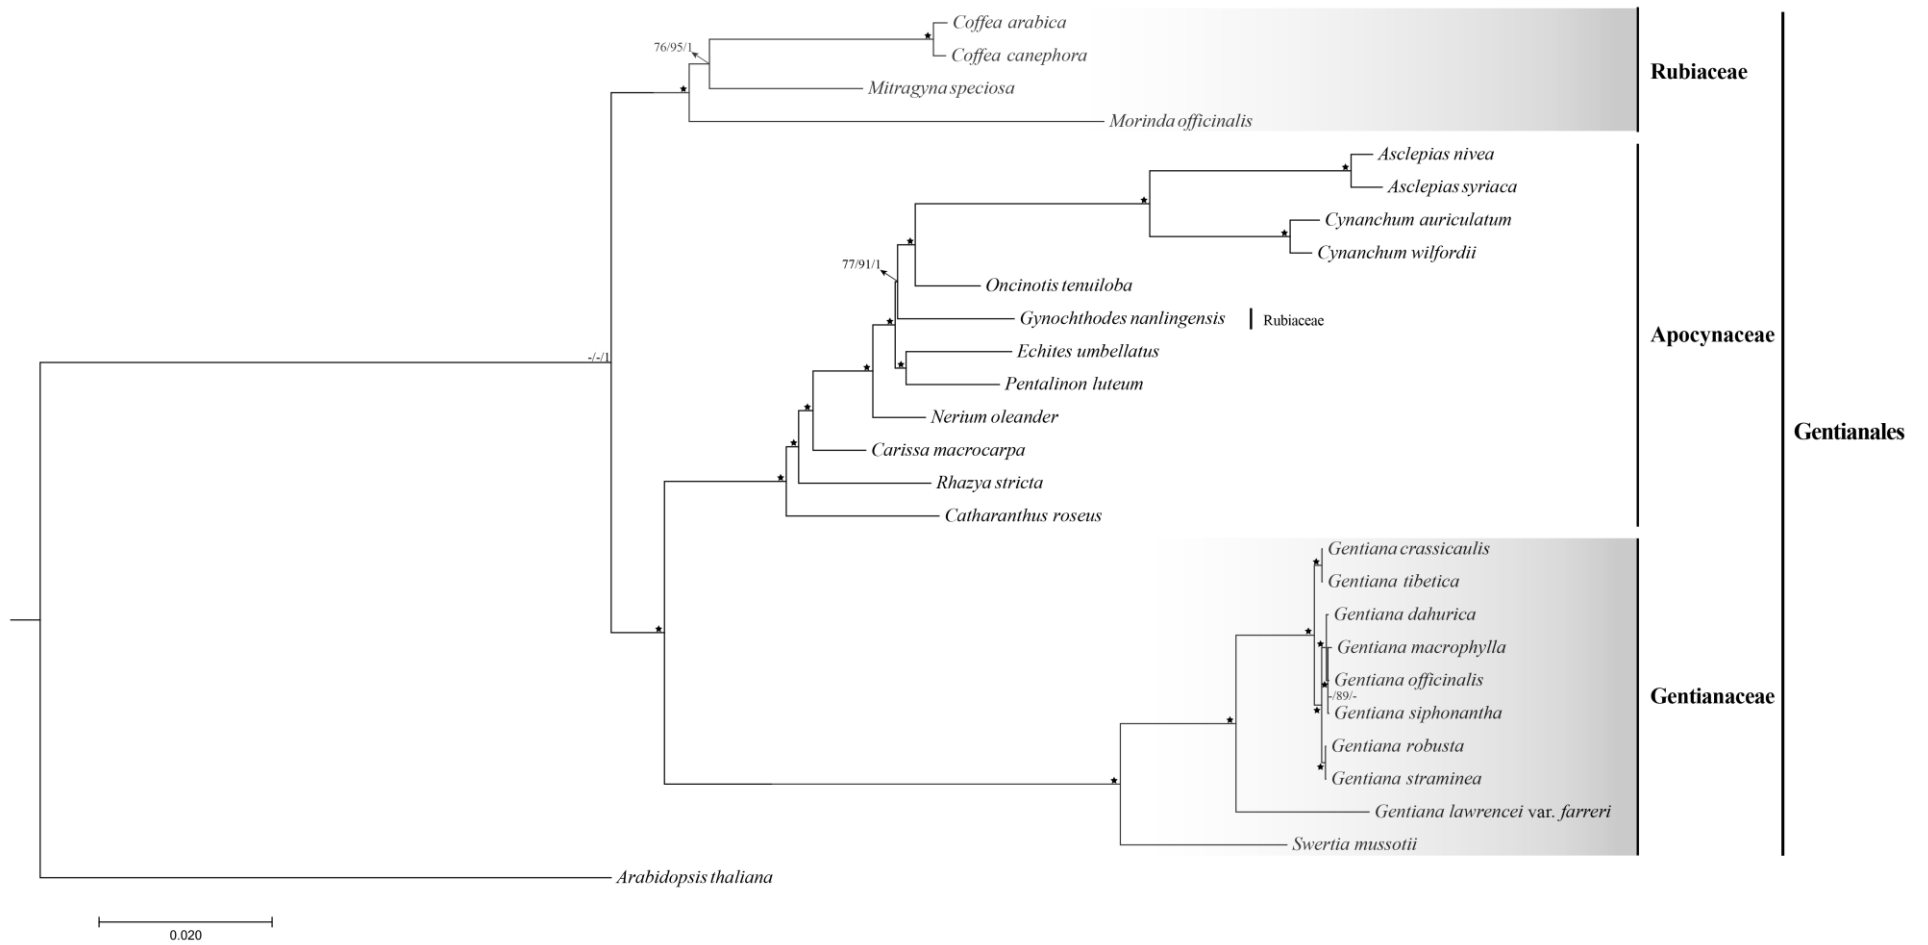

**Figure S2.** Phylogenetic relationships of species belong to *Gentiana* sect. *Cruciata* inferred from MP/ML/BI analysis based on 70 shared PCGs. The numbers associated with each node are bootstrap support and posterior probability values, and the symbol ★ in the phylogenetic tree indicated that the support value of branch is 100/100/1.0.

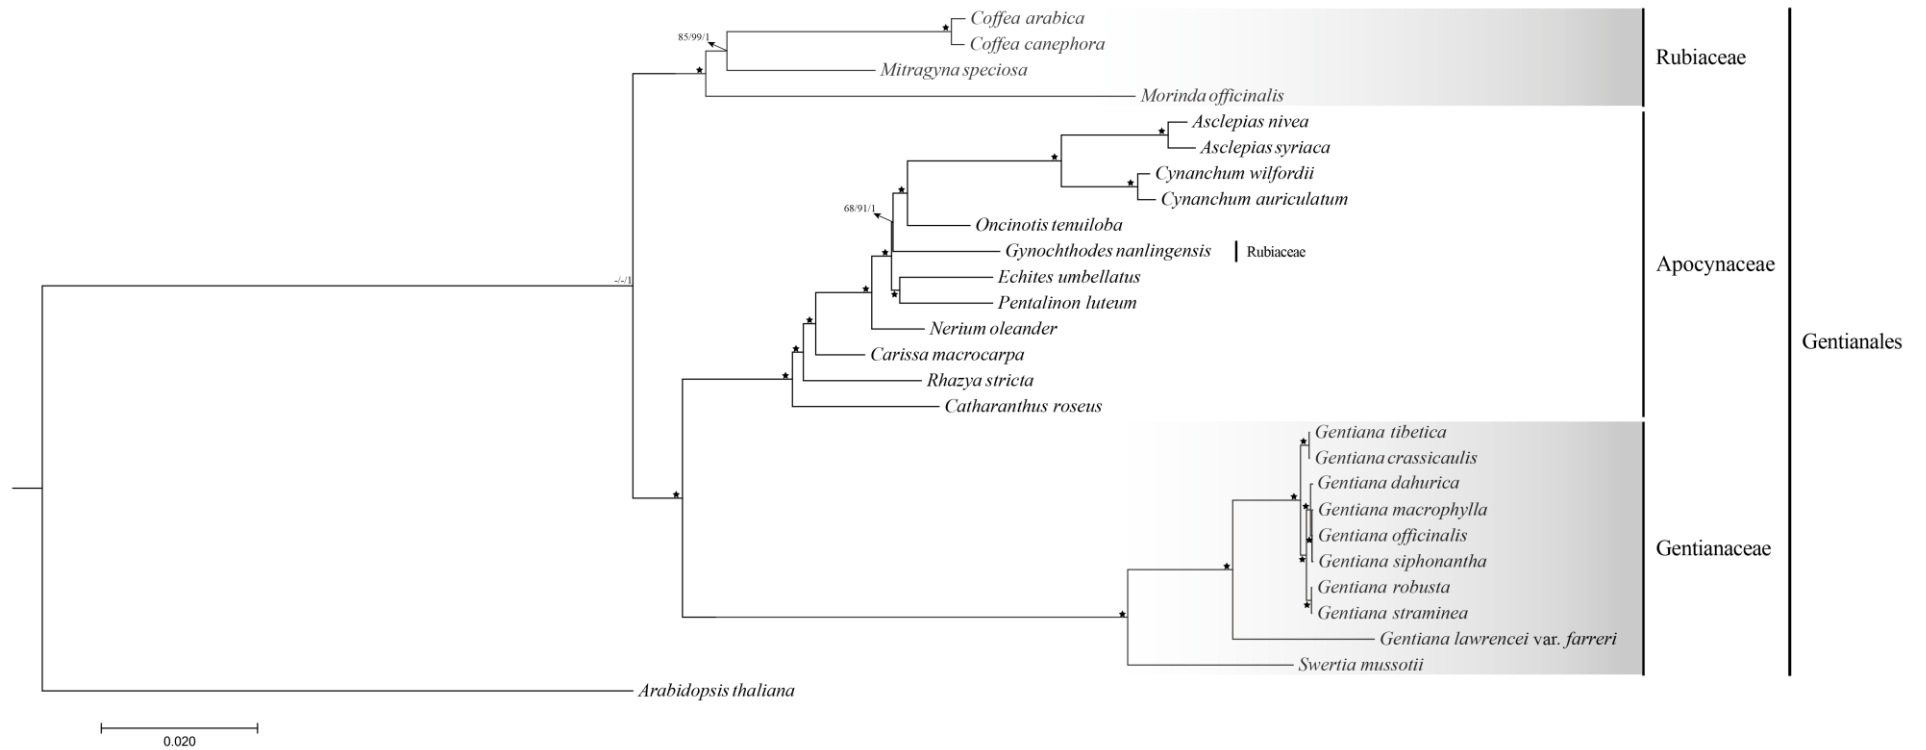

**Figure S3.** Phylogenetic relationships of species belong to *Gentiana* sect. *Cruciata* inferred from MP/ML/BI analysis based on TMCRs of chloroplast genomes. The numbers associated with each node are bootstrap support and posterior probability values, and the symbol ★ in the phylogenetic tree indicated that the support value of branch is 100/100/1.0.
