# Supplementary material for: Comparative Chloroplast Genome Analyses of Species in Gentiana section Cruciata (Gentianaceae) and the Development of Authentication Markers
Source: Int J Mol Sci. 2018 Jul 5;19(7):1962. doi: 10.3390/ijms19071962 (PMC6073106; doi:10.3390/ijms19071962)
Supplement: Supplementary file 1 [file ijms-19-01962-s001.zip]

Archive with 9 entries (9 files):
- Supplementary Materials/ijms-311023-suppl-fig.pdf
- Supplementary Materials/Table S1.xlsx
- Supplementary Materials/Table S2.xlsx
- Supplementary Materials/Table S3.xlsx
- Supplementary Materials/Table S4.xlsx
- Supplementary Materials/Table S5.xlsx
- Supplementary Materials/Table S6.xlsx
- Supplementary Materials/Table S7.xlsx
- Supplementary Materials/Table S8.xlsx
