# Supplementary material for: Comparative Chloroplast Genome Analyses of Species in Gentiana section Cruciata (Gentianaceae) and the Development of Authentication Markers
Source: Int J Mol Sci. 2018 Jul 5;19(7):1962. doi: 10.3390/ijms19071962 (PMC6073106; doi:10.3390/ijms19071962)
Supplement: Supplementary file 1 [file ijms-19-01962-s001.zip › Supplementary Materials/Table S1.xlsx]

## Sheet: G. crassicaulis
Table S1 Analysis of palindromic repeats and dispersed repeats in eight Gentiana chloroplast genomes
	Length of the 1st repeat	Starting position of the 1st repeat	Direction	Length of the 2nd repeat	Starting position of the 2nd repeat	Distance between the repeats	Evalue	Repeat sequences	RegionA	RegionB
Dispersed repeats	41	88420	F	41	88435	0	1.29e-15	TTATTGATGATATCAATATTGATGATATCAATATTGATGAT	IRb; CDS (ycf2)	IRb; CDS (ycf2)
	41	141464	F	41	141479	0	1.29e-15	CTATCATCAATATTGATATCATCAATATTGATATCATCAAT	IRa; CDS (ycf2)	IRa; CDS (ycf2)
	38	42404	F	38	95264	0	8.24e-14	TCAGAACCGTACATGAGATTTTCACCTCATACGGCTCC	LSC; ycf3 intron	IRb; IGS (rps12-trnV-GAC)
	41	117	F	41	143	-2	9.5e-12	CTATTTTCTTTTTTTAACTCTTTTTTATATTTTCTTTTTTT	LSC; IGS(trnH-GUG-psbA)	LSC; IGS(trnH-GUG-psbA)
	36	95267	F	36	115909	-1	1.42e-10	GAACCGTACATGAGATTTTCACCTCATACGGCTCCT	IRb; IGS (rps12-trnV-GAC)	SSC; ndhA intron
	38	37283	F	38	39507	-2	5.21e-10	AGCAATAGCTAAATGATGATGGGCAATATCAGTTAGCC	LSC; CDS (psaB)	LSC; CDS (psaA)
	35	42407	F	35	115909	-1	5.54e-10	GAACCGTACATGAGATTTTCACCTCATACGGCTCC	LSC; ycf3 intron	SSC; ndhA intron
	38	92209	F	38	115906	-3	1.88e-08	TCAAAACCGTGCATGAGACTTTCATCTCACACGGCTCC	IRb; ndhB intron	SSC; ndhA intron
	31	65344	F	31	65353	-1	1.26e-07	TCAAGTAAGGCAAGTAAGGCAAGTAAGGGAA	LSC; IGS(rpl33-rps18)	LSC; IGS(rpl33-rps18)
	32	103824	F	32	103855	-3	4.52e-05	TCATTGTTCAAATCTTTGACAACACGAAAAAA	IRb; IGS (rrn4.5-rrn5)	IRb; IGS (rrn4.5-rrn5)
	32	126053	F	32	126084	-3	4.52e-05	GGTTTTTTCATGTTGTCAGAGAGTTGAACAAT	IRa; IGS (rrn5-rrn4.5)	IRa; IGS (rrn5-rrn4.5)
	30	8083	F	30	34982	-3	0.000592	AACGATGCGGGTTCGATTCCCGCTACCCGC	LSC; trnG-UCC	LSC; trnG-GCC
	30	88420	F	30	88450	-3	0.000592	TTATTGATGATATCAATATTGATGATATCA	IRb; CDS (ycf2)	IRb; CDS (ycf2)
	30	92219	F	30	115916	-3	0.000592	GCATGAGACTTTCATCTCACACGGCTCCTA	IRb; CDS (ndhB)	SSC; ndhA intron
	30	141464	F	30	141494	-3	0.000592	CTATCATCAATATTGATATCATCAATATTG	IRa; CDS (ycf2)	IRa; CDS (ycf2)
	30	30047	C	30	34872	-3	0.000592	CTGTATTCTATATATATATTCTGTATATGA	LSC; IGS(trnE-UUC-trnT-GGU)	LSC; IGS(psbZ-trnG-GCC)
Palindromic repeats	30	250	P	30	250	-2	2.11e-05	TATCTTAGTTACCAATATTGGTAACTAATA	LSC; IGS(trnH-GUG-psbA)	LSC; IGS(trnH-GUG-psbA)
	32	6722	P	32	43795	-3	4.52e-05	GAAGAGGAAAGAAAGGGATTCGAACCCTCGGT	LSC; trnS-GCU	LSC; trnS-GGA
	41	88420	P	41	141464	0	1.29e-15	TTATTGATGATATCAATATTGATGATATCAATATTGATGAT	IRb; CDS (ycf2)	IRa; CDS (ycf2)
	41	88435	P	41	141479	0	1.29e-15	ATATTGATGATATCAATATTGATGATATCAATATTGATGAT	IRb; CDS (ycf2)	IRa; CDS (ycf2)
	38	42404	P	38	134638	0	8.24e-14	TCAGAACCGTACATGAGATTTTCACCTCATACGGCTCC	LSC; ycf3 intron	IRa; IGS (trnV-GAC-rps12)
	32	34108	P	32	43798	-3	4.52e-05	AACAAAAGGGAGAGAGAGGGATTCGAACCCTC	LSC; trnS-UGA	LSC; trnS-GGA
	44	12686	P	44	12686	-2	1.71e-13	CATTCTTATATTTTATTTCAATTAGTTGAAATAAAATATAAGAAT	LSC; IGS(atpH-atpI)	LSC; IGS(atpH-atpI)
	36	115909	P	36	134637	-1	1.42e-10	AAACCGTACATGAGATTTTCATCTCATACGGCTCCT	SSC; ndhA intron	IRa; IGS (trnV-GAC-rps12)
	32	8420	P	32	120780	0	3.37e-10	AAATTCCTTTTTTTGTTAAGACCGAAATCAAA	LSC; IGS(trnR-UCU-atpA)	SSC; CDS (ycf1)
	38	115906	P	38	137693	-3	1.88e-08	CCAAAACCGTACATGAGATTTTCATCTCATACGGCTCC	SSC; ndhA intron	IRa; ndhB intron
	32	103824	P	32	126053	-3	4.52e-05	TCATTGTTCAAATCTTTGACAACACGAAAAAA	IRb; IGS (rrn4.5-rrn5)	IRa; IGS (rrn5-rrn4.5)
	32	103855	P	32	126084	-3	4.52e-05	ACATTGTTCAACTCTCTGACAACATGAAAAAA	IRb; IGS (rrn4.5-rrn5)	IRa; IGS (rrn5-rrn4.5)
	31	150	P	31	6938	-3	0.000164	CTTTTTTTAACTCTTTTTTATATTTTTTTGT	LSC; IGS(trnH-GUG-psbA)	LSC; IGS(trnS-GCU-trnG-UCC)
	30	88420	P	30	141460	-3	0.000592	TTATTGATGATATCAATATTGATGATATCA	IRb; CDS (ycf2)	IRa; CDS (ycf2)
	30	88450	P	30	141490	-3	0.000592	ATATTGATGATATCAATATTGATGATAGTG	IRb; CDS (ycf2)	IRa; CDS (ycf2)
	30	115916	P	30	137691	-3	0.000592	ACATGAGATTTTCATCTCATACGGCTCCTC	SSC; ndhA intron	IRa; ndhB intron

## Sheet: G. robusta
Table S1 Analysis of palindromic repeats and dispersed repeats in eight Gentiana chloroplast genomes
	Length of the 1st repeat	Starting position of the 1st repeat	Direction	Length of the 2nd repeat	Starting position of the 2nd repeat	Distance between the repeats	Evalue	Repeat sequences	RegionA	RegionB
Dispersed repeats	38	42464	F	38	95263	0	8.25e-14	TCAGAACCGTACATGAGATTTTCACCTCATACGGCTCC	LSC; ycf3 intron	IRb; IGS (rps12-trnV-GAC)
	36	88421	F	36	88436	0	1.32e-12	TCGGGAGTTCCTCTATTCAATCCTTTTCCTTCTTCT	IRb; CDS (ycf2)	IRb; CDS (ycf2)
	36	141603	F	36	141618	0	1.32e-12	GCATCAATATTGATATCATCAATATTGATATCATCA	IRa; CDS (ycf2)	IRa; CDS (ycf2)
	36	95266	F	36	115985	-1	1.43e-10	GAACCGTACATGAGATTTTCACCTCATACGGCTCCT	IRb; IGS (rps12-trnV-GAC)	SSC; ndhA intron
	32	103868	F	32	103899	-3	4.53e-05	TCATTGTTCAAATCTTTGACAACACGAAAAAA	IRb; IGS (rrn4.5-rrn5)	IRb; IGS (rrn4.5-rrn5)
	38	37345	F	38	39569	-2	5.22e-10	AGGTGGAAGATTCATTAAATTGGGAAACGTTACCCTGC	LSC; CDS (psaB)	LSC; CDS (psaA)
	35	42467	F	35	115985	-1	5.55e-10	GAACCGTACATGAGATTTTCACCTCATACGGCTCC	LSC; ycf3 intron	SSC; ndhA intron
	38	92208	F	38	115982	-3	1.88e-08	TCAAAACCGTGCATGAGACTTTCATCTCACACGGCTCC	IRb; ndhB intron	SSC; ndhA intron
	31	122545	F	31	122566	-3	0.000164	TTACTATTATTACTATTAGTAATAGTTTTTT	SSC; CDS (ycf1)	SSC; CDS (ycf1)
	30	6912	F	30	6937	-3	0.000593	TATATAGATATTATATGGATATGTACACAT	LSC; IGS(trnS-GCU-trnG-UCC)	LSC; IGS(trnS-GCU-trnG-UCC)
	30	8172	F	30	35050	-3	0.000593	AACGATGCGGGTTCGATTCCCGCTACCCGC	LSC; trnG-UCC	LSC; trnG-GCC
	30	92218	F	30	115992	-3	0.000593	GCATGAGACTTTCATCTCACACGGCTCCTA	IRb; ndhB intron	SSC; ndhA intron
	32	126144	F	32	126175	-3	4.53e-05	GGTTTTTTCATGTTGTCAGAGAGTTGAACAAT	IRa; IGS (rrn5-rrn4.5)	IRa; IGS (rrn5-rrn4.5)
Palindromic repeats	38	115982	P	38	137829	-3	1.88e-08	CCAAAACCGTACATGAGATTTTCATCTCATACGGCTCC	SSC; ndhA intron	IRa; ndhB intron
	32	8509	P	32	120856	-1	3.25e-08	AAATTCCTTTTTTTGTTAAGACCGAAATCAAA	LSC; IGS(trnR-UCU-atpA)	SSC; CDS (ycf1)
	30	12783	P	30	12783	-2	2.12e-05	ATATTTTATTTCAATTAGTTGAAATAAAAT	LSC; IGS(atpH-atpI)	LSC; IGS(atpH-atpI)
	32	6774	P	32	43855	-3	4.53e-05	GAAGAGGAAAGAAAGGGATTCGAACCCTCGGT	LSC; trnS-GCU	LSC; trnS-GGA
	32	34226	P	32	43858	-3	4.53e-05	AACAAAAGGGAGAGAGAGGGATTCGAACCCTC	LSC; trnS-UGA	LSC; trnS-GGA
	38	42464	P	38	134774	0	8.25e-14	TCAGAACCGTACATGAGATTTTCACCTCATACGGCTCC	LSC; ycf3 intron	IRa; IGS (trnV-GAC-rps12)
	36	88421	P	36	141603	0	1.32e-12	GTTGATGATATCAATATTGATGATATCAATATTGAT	IRb; CDS (ycf2)	IRa; CDS (ycf2)
	36	88436	P	36	141618	0	1.32e-12	ATTGATGATATCAATATTGATGATATCAATATTGAT	IRb; CDS (ycf2)	IRa; CDS (ycf2)
	32	103868	P	32	126144	-3	4.53e-05	TCATTGTTCAAATCTTTGACAACACGAAAAAA	IRb; IGS (rrn4.5-rrn5)	IRa; IGS (rrn5-rrn4.5)
	32	103899	P	32	126175	-3	4.53e-05	ACATTGTTCAACTCTCTGACAACATGAAAAAA	IRb; IGS (rrn4.5-rrn5)	IRa; IGS (rrn5-rrn4.5)
	36	115985	P	36	134773	-1	1.43e-10	AAACCGTACATGAGATTTTCATCTCATACGGCTCCT	SSC; ndhA intron	IRa; IGS (trnV-GAC-rps12)
	31	124	P	31	7015	-3	0.000164	ATTTTTTTAACTCTTTTTTATATTTTTTTGT	LSC; IGS(trnH-GUG-psbA)	LSC; IGS(trnS-GCU-trnG-UCC)
	30	115992	P	30	137827	-3	0.000593	ACATGAGATTTTCATCTCATACGGCTCCTC	SSC; ndhA intron	IRa; ndhB intron

## Sheet: G. macrophylla
Table S1 Analysis of palindromic repeats and dispersed repeats in eight Gentiana chloroplast genomes
	Length of the 1st repeat	Starting position of the 1st repeat	Direction	Length of the 2nd repeat	Starting position of the 2nd repeat	Distance between the repeats	Evalue	Repeat sequences	RegionA	RegionB
Dispersed repeats	117	296	F	117	149682	0	2.29e-61	GTCACGGGCGAACGACGGGAATTGAACCCGCGCATAGTGGATTCACAATCCACTGCCTTAATCCACTTGGCTACATCCGCCCCTTGACTATCTGTATTTCTTTAGTCTTTAAATTCT	LSC; trnH-GUG	LSC; IGS(rpl2-trnH-GUG)
	83	55509	F	83	55606	0	6.76e-41	GATTCATTTATAGGTTATTTATTTATAGGTTATAGGAAAAACAAATATTTCTATTTCTTTTTTTCGATGCGAATATAGTGTAT	LSC; IGS(rbcL-accD)	LSC; IGS(rbcL-accD)
	72	34828	F	72	34901	0	2.83e-34	CCATATATCCGTGTATATGCTCCAGCGCGCCCTTATGTACGAAGAAAGTGGTAAAGGATTAGTCATAAGTCA	LSC; IGS(trnS-UGA-psbZ)	LSC; IGS(trnS-UGA-psbZ)
	41	30529	F	41	30581	0	1.31e-15	GTAAATATGTAATATAATATGATAATAGATCTATATTATCA	LSC; IGS(trnE-UUC-trnT-GGU)	LSC; IGS(trnE-UUC-trnT-GGU)
	38	42956	F	38	95891	0	8.37e-14	TCAGAACCGTACATGAGATTTTCACCTCATACGGCTCC	LSC; ycf3 intron	IRb; IGS (rps12-trnV-GAC)
	38	89047	F	38	89062	0	8.37e-14	TTATTGATGATATCAATATTGATGATATCAATATTGAT	IRb; CDS (ycf2)	IRb; CDS (ycf2)
	38	142269	F	38	142284	0	8.37e-14	GCATCAATATTGATATCATCAATATTGATATCATCAAT	IRa; CDS (ycf2)	IRa; CDS (ycf2)
	44	149254	F	44	149612	-2	1.74e-13	AATTATTTTTATCACCCTACACGTGTCGGAGCGTGTGGGGAACG	LSC; IGS(rpl2-trnH-GUG)	LSC; IGS(rpl2-trnH-GUG)
	35	31343	F	35	31399	0	5.35e-12	TATTAAGTCTATTACCAAAAATTGTGTATCCAATA	LSC; IGS(trnT-GGU-psbD)	LSC; IGS(trnT-GGU-psbD)
	41	418	F	41	444	-2	9.65e-12	CTATTTTCTTTTTTTAACTCTTTTTTATATTTTCTTTTTTT	LSC; IGS(trnH-GUG-psbA)	LSC; IGS(trnH-GUG-psbA)
	36	95894	F	36	116626	-1	1.45e-10	GAACCGTACATGAGATTTTCACCTCATACGGCTCCT	IRb; IGS (rps12-trnV-GAC)	SSC; ndhA intron
	32	468	F	32	539	0	3.43e-10	TTATATTTTTTTGTTTTACTAGTTTTTTTAGA	LSC; IGS(trnH-GUG-psbA)	LSC; IGS(trnH-GUG-psbA)
	32	149215	F	32	149578	0	3.43e-10	ATCGGGGAGTGCCGGATATTAAAATTTAAAAT	LSC; IGS(rpl2-trnH-GUG)	LSC; IGS(rpl2-trnH-GUG)
	38	37835	F	38	40059	-2	5.29e-10	AGCAATAGCTAAATGATGATGGGCAATATCAGTTAGCC	LSC; CDS (psaB)	LSC; CDS (psaA)
	35	42959	F	35	116626	-1	5.62e-10	GAACCGTACATGAGATTTTCACCTCATACGGCTCC	LSC; ycf3 intron	SSC; ndhA intron
	31	500	F	31	572	0	1.37e-09	ATTAGTTATATTGTAATGTCAATATTTTAAT	LSC; IGS(trnH-GUG-psbA)	LSC; IGS(trnH-GUG-psbA)
	31	30431	F	31	30461	0	1.37e-09	AAGCAACCAAGAGTCTACCGCTGCTGTCTGT	LSC; IGS(trnE-UUC-trnT-GGU)	LSC; IGS(trnE-UUC-trnT-GGU)
	33	149487	F	33	149498	-1	8.48e-09	TAAAAAAAAAAAAAAACAAAAAAAAAACAAAAA	LSC; IGS(rpl2-trnH-GUG)	LSC; IGS(rpl2-trnH-GUG)
	38	92836	F	38	116623	-3	1.91e-08	TCAAAACCGTGCATGAGACTTTCATCTCACACGGCTCC	IRb; ndhB intron	SSC; ndhA intron
	30	149185	F	30	149555	-1	4.93e-07	AGTGTGGGGAGTGTCGTTGCTTAGTCGGGG	LSC; CDS (rpl2)	LSC; IGS(rpl2-trnH-GUG)
	32	104501	F	32	104532	-3	4.59e-05	TCATTGTTCAAATCTTTGACAACACGAAAAAA	IRb; IGS (rrn4.5-rrn5)	IRb; IGS (rrn4.5-rrn5)
	32	126805	F	32	126836	-3	4.59e-05	GGTTTTTTCATGTTGTCAGAGAGTTGAACAAT	IRa; IGS (rrn4.5-rrn5)	IRa; IGS (rrn4.5-rrn5)
	30	8504	F	30	35534	-3	0.000601	AACGATGCGGGTTCGATTCCCGCTACCCGC	LSC; trnG-UCC	LSC; trnG-GCC
	30	92846	F	30	116633	-3	0.000601	GCATGAGACTTTCATCTCACACGGCTCCTA	IRb; ndhB intron	SSC; ndhA intron
	36	126324	R	36	126324	0	1.34e-12	CAATTGGGCTTTACTTTACCATTTCATTTCGGGTTA	IRa; IGS(trnR-ACG-rrn5)	IRa; IGS(trnR-ACG-rrn5)
	42	149487	R	42	149487	-2	2.53e-12	TAAAAAAAAAAAAAAACAAAAAAAAAACAAAAAAAAAACAAA	LSC; IGS(rpl2-trnH-GUG)	LSC; IGS(rpl2-trnH-GUG)
	35	149496	R	35	149496	0	5.35e-12	AAAAAAACAAAAAAAAAACAAAAAAAAAACAAAAA	LSC; IGS(rpl2-trnH-GUG)	LSC; IGS(rpl2-trnH-GUG)
	31	149487	R	31	149487	-2	5.74e-06	TAAAAAAAAAAAAAAACAAAAAAAAAACAAA	LSC; IGS(rpl2-trnH-GUG)	LSC; IGS(rpl2-trnH-GUG)
Palindromic repeats	38	89047	P	38	142269	0	8.37e-14	TTATTGATGATATCAATATTGATGATATCAATATTGAT	IRb; CDS (ycf2)	IRa; CDS (ycf2)
	38	89062	P	38	142284	0	8.37e-14	ATATTGATGATATCAATATTGATGATATCAATATTGAT	IRb; CDS (ycf2)	IRa; CDS (ycf2)
	38	42956	P	38	135440	0	8.37e-14	TCAGAACCGTACATGAGATTTTCACCTCATACGGCTCC	LSC; ycf3 intron	IRa; IGS (trnV-GAC-rps7)
	165	138	P	165	81789	0	2.89e-90	TTAGAATTGTTTTTTCGTCTTTACAAAACAAAAAGAAAAAAAAAAGAGGAGTAAGCTGTGACACGTTCAGTAAAAAAAAATCCTTTTGTAGCCAACCATTTATTAAAAAAAATGAATAAACTTAACACAAAAGAAGAAAAAGAAATAATCGTAACCTGGTCACGG	LSC; IGS(rpl2-trnH-GUG)	LSC; CDS (rps19)
	36	116626	P	36	135439	-1	1.45e-10	AAACCGTACATGAGATTTTCATCTCATACGGCTCCT	SSC; ndhA intron	IRa; IGS (trnV-GAC-rps7)
	38	116623	P	38	138495	-3	1.91e-08	CCAAAACCGTACATGAGATTTTCATCTCATACGGCTCC	SSC; ndhA intron	IRa; ndhB intron
	32	8841	P	32	121497	-1	3.29e-08	AAATTCCTTTTTTTGTTAAGACCGAAATCAAA	LSC; IGS(trnR-UCU-atpA)	SSC; CDS (ycf1)
	36	81983	P	36	149397	-3	2.58e-07	AGAATCAAATTATCACTATATTTATTCCTTTTTCTA	LSC; CDS (rpl2)	IRa; CDS (ycf2)
	30	13117	P	30	13117	-2	2.15e-05	ATATTTTATTTCAATTAGTTGAAATAAAAT	LSC; IGS(atpH-atpI)	LSC; IGS(atpH-atpI)
	32	7132	P	32	44353	-3	4.59e-05	GAAGAGGAAAGAAAGGGATTCGAACCCTCGGT	LSC; trnS-GCU	LSC; trnS-GGA
	32	34635	P	32	44356	-3	4.59e-05	AACAAAAGGGAGAGAGAGGGATTCGAACCCTC	LSC; trnS-UGA	LSC; trnS-GGA
	32	81974	P	32	149410	-3	4.59e-05	CGGCGACGAAGAATCAAATTATCACTATATTT	LSC; CDS (rpl2)	IRa; CDS (ycf2)
	32	104501	P	32	126805	-3	4.59e-05	TCATTGTTCAAATCTTTGACAACACGAAAAAA	IRb; IGS (rrn4.5-rrn5)	IRa; IGS (rrn4.5-rrn5)
	32	104532	P	32	126836	-3	4.59e-05	ACATTGTTCAACTCTCTGACAACATGAAAAAA	IRb; IGS (rrn4.5-rrn5)	IRa; IGS (rrn4.5-rrn5)
	31	451	P	31	7348	-3	0.000166	CTTTTTTTAACTCTTTTTTATATTTTTTTGT	LSC; IGS(trnH-GUG-psbA)	LSC; IGS(trnS-GCU-trnG-UCC)
	31	81964	P	31	149421	-3	0.000166	CTATTTACTACGGCGACGAAGAATCAAATTA	LSC; CDS (rpl2)	LSC; IGS(rpl2-trnH-GUG)
	30	81952	P	30	149434	-3	0.000601	CTATTTTATCTCCTATTTACTACGGCGACG	LSC; CDS (rpl2)	LSC; IGS(rpl2-trnH-GUG)
	30	116633	P	30	138493	-3	0.000601	ACATGAGATTTTCATCTCATACGGCTCCTC	SSC; ndhA intron	IRa; ndhB intron

## Sheet: G. siphonantha
Table S1 Analysis of palindromic repeats and dispersed repeats in eight Gentiana chloroplast genomes
	Length of the 1st repeat	Starting position of the 1st repeat	Direction	Length of the 2nd repeat	Starting position of the 2nd repeat	Distance between the repeats	Evalue	Repeat sequences	RegionA	RegionB
Dispersed repeats	38	42386	F	38	95221	0	8.25e-14	TCAGAACCGTACATGAGATTTTCACCTCATACGGCTCC	LSC; ycf3 intron	IRb; IGS (rps12-trnV-GAC)
	38	88378	F	38	88393	0	8.25e-14	TTATTGATGATATCAATATTGATGATATCAATATTGAT	IRb; CDS (ycf2)	IRb; CDS (ycf2)
	38	141598	F	38	141613	0	8.25e-14	GCATCAATATTGATATCATCAATATTGATATCATCAAT	IRa; CDS (ycf2)	IRa; CDS (ycf2)
	36	95224	F	36	115943	-1	1.43e-10	GAACCGTACATGAGATTTTCACCTCATACGGCTCCT	IRb; IGS (rps12-trnV-GAC)	SSC; ndhA intron
	32	103829	F	32	103860	-3	4.53e-05	TCATTGTTCAAATCTTTGACAACACGAAAAAA	IRb; IGS (rrn4.5-rrn5)	IRb; IGS (rrn4.5-rrn5)
	38	37267	F	38	39491	-2	5.22e-10	AGCAATAGCTAAATGATGATGGGCAATATCAGTTAGCC	LSC; CDS (psaB)	LSC; CDS (psaA)
	35	42389	F	35	115943	-1	5.55e-10	GAACCGTACATGAGATTTTCACCTCATACGGCTCC	LSC; ycf3 intron	SSC; ndhA intron
	38	92167	F	38	115940	-3	1.88e-08	TCAAAACCGTGCATGAGACTTTCATCTCACACGGCTCC	IRb; ndhB intron	SSC; ndhA intron
	32	126137	F	32	126168	-3	4.53e-05	GGTTTTTTCATGTTGTCAGAGAGTTGAACAAT	IRb; IGS (rrn5-rrn4.5)	IRb; IGS (rrn5-rrn4.5)
	30	8144	F	30	34966	-3	0.000593	AACGATGCGGGTTCGATTCCCGCTACCCGC	LSC; trnG-UCC	LSC; trnG-GCC
	30	92177	F	30	115950	-3	0.000593	GCATGAGACTTTCATCTCACACGGCTCCTA	IRb; ndhB intron	SSC; ndhA intron
	30	122833	F	30	122857	-3	0.000593	AACAAGGATTTAAATTTAAATTATGACAAG	SSC; CDS (ycf1)	SSC; CDS (ycf1)
Palindromic repeats	38	115940	P	38	137824	-3	1.88e-08	CCAAAACCGTACATGAGATTTTCATCTCATACGGCTCC	SSC; ndhA intron	IRa; ndhB intron
	32	8481	P	32	120813	-1	3.25e-08	AAATTCCTTTTTTTGTTAAGACCGAAATCAAA	LSC; IGS(trnR-UCU-atpA)	SSC; CDS (ycf1)
	30	12756	P	30	12756	-2	2.12e-05	ATATTTTATTTCAATTAGTTGAAATAAAAT	LSC; IGS(atpH-atpI)	LSC; IGS(atpH-atpI)
	32	6773	P	32	43783	-3	4.53e-05	GAAGAGGAAAGAAAGGGATTCGAACCCTCGGT	LSC; trnS-GCU	LSC; trnS-GGA
	32	34142	P	32	43786	-3	4.53e-05	AACAAAAGGGAGAGAGAGGGATTCGAACCCTC	LSC; trnS-UGA	LSC; trnS-GGA
	38	42386	P	38	134770	0	8.25e-14	TCAGAACCGTACATGAGATTTTCACCTCATACGGCTCC	LSC; ycf3 intron	IRa; IGS (trnV-GAC-rps12)
	38	88378	P	38	141598	0	8.25e-14	TTATTGATGATATCAATATTGATGATATCAATATTGAT	IRb; CDS (ycf2)	IRa; CDS (ycf2)
	38	88393	P	38	141613	0	8.25e-14	ATATTGATGATATCAATATTGATGATATCAATATTGAT	IRb; CDS (ycf2)	IRa; CDS (ycf2)
	36	115943	P	36	134769	-1	1.43e-10	AAACCGTACATGAGATTTTCATCTCATACGGCTCC	SSC; ndhA intron	IRa; IGS (trnV-GAC-rps12)
	32	103829	P	32	126137	-3	4.53e-05	TCATTGTTCAAATCTTTGACAACACGAAAAAA	IRb; IGS (rrn4.5-rrn5)	IRa; IGS (rrn5-rrn4.5)
	32	103860	P	32	126168	-3	4.53e-05	ACATTGTTCAACTCTCTGACAACATGAAAAAA	IRb; IGS (rrn4.5-rrn5)	IRa; IGS (rrn5-rrn4.5)
	31	124	P	31	6989	-3	0.000164	CTTTTTTTAACTCTTTTTTATATTTTTTTGT	LSC; IGS(trnH-GUG-psbA)	LSC; IGS(trnS-GCU-trnG-UCC)
	30	115950	P	30	137822	-3	0.000593	ACATGAGATTTTCATCTCATACGGCTCCTC	SSC; ndhA intron	IRa; ndhB intron

## Sheet: G. officinalis
Table S1 Analysis of palindromic repeats and dispersed repeats in eight Gentiana chloroplast genomes
	Length of the 1st repeat	Starting position of the 1st repeat	Direction	Length of the 2nd repeat	Starting position of the 2nd repeat	Distance between the repeats	Evalue	Repeat sequences	RegionA	RegionB
Dispersed repeats	38	42382	F	38	95218	0	8.25e-14	TCAGAACCGTACATGAGATTTTCACCTCATACGGCTCC	LSC; ycf3 intron	IRb; IGS (rps12-trnV-GAC)
	38	88375	F	38	88390	0	8.25e-14	TTATTGATGATATCAATATTGATGATATCAATATTGAT	IRb; CDS (ycf2)	IRb; CDS (ycf2)
	38	141546	F	38	141585	0	8.25e-14	GCATCAATATTGATATCATCAATATTGATATCATCAAT	IRa; CDS (ycf2)	IRa; CDS (ycf2)
	36	95221	F	36	115915	-1	1.43e-10	GAACCGTACATGAGATTTTCACCTCATACGGCTCCT	IRb; IGS (rps12-trnV-GAC)	SSC; ndhA intron
	38	37263	F	38	39487	-2	5.22e-10	AGCAATAGCTAAATGATGATGGGCAATATCAGTTAGCC	LSC; CDS (psaB)	LSC; CDS (psaA)
	35	42385	F	35	115939	-1	5.54e-10	GAACCGTACATGAGATTTTCACCTCATACGGCTCC	LSC; ycf3 intron	SSC; ndhA intron
	38	92164	F	38	115936	-3	1.88e-08	TCAAAACCGTGCATGAGACTTTCATCTCACACGGCTCC	IRb; ndhB intron	SSC; ndhA intron
	32	103826	F	32	103857	-3	4.52e-05	TCATTGTTCAAATCTTTGACAACACGAAAAAA	IRb; IGS (rrn4.5-rrn5)	IRb; IGS (rrn4.5-rrn5)
	32	126109	F	32	126140	-3	4.52e-05	GGTTTTTTCATGTTGTCAGAGAGTTGAACAAT	IRb; IGS (rrn5-rrn4.5)	IRb; IGS (rrn5-rrn4.5)
	30	8144	F	30	34962	-3	0.000593	AACGATGCGGGTTCGATTCCCGCTACCCGC	LSC; trnG-UCC	LSC; trnG-GCC
	30	92174	F	30	115922	-3	0.000593	GCATGAGACTTTCATCTCACACGGCTCCTA	IRb; ndhB intron	SSC; ndhA intron
Palindromic repeats	38	115936	P	38	137796	-3	1.88e-08	CCAAAACCGTACATGAGATTTTCATCTCATACGGCTCC	SSC; ndhA intron	IRa; ndhB intron
	32	8481	P	32	120809	-1	3.24e-08	AAATTCCTTTTTTTGTTAAGACCGAAATCAAA	LSC; IGS(trnR-UCU-atpA)	SSC; CDS (ycf1)
	30	12756	P	30	12756	-2	2.12e-05	ATATTTTATTTCAATTAGTTGAAATAAAAT	LSC; IGS(atpH-atpI)	LSC; IGS(atpH-atpI)
	32	6773	P	32	43778	-3	4.52e-05	GAAGAGGAAAGAAAGGGATTCGAACCCTCGGT	LSC; trnS-GCU	LSC; trnS-GGA
	32	34138	P	32	43781	-3	4.52e-05	AACAAAAGGGAGAGAGAGGGATTCGAACCCTC	LSC; trnS-UGA	LSC; trnS-GGA
	38	88375	P	38	141570	0	8.25e-14	TTATTGATGATATCAATATTGATGATATCAATATTGAT	IRb; CDS (ycf2)	IRa; CDS (ycf2)
	38	88390	P	38	141585	0	8.25e-14	ATATTGATGATATCAATATTGATGATATCAATATTGAT	IRb; CDS (ycf2)	IRa; CDS (ycf2)
	38	42382	P	38	134742	0	8.25e-14	TCAGAACCGTACATGAGATTTTCACCTCATACGGCTCC	LSC; ycf3 intron	IRa; IGS (trnV-GAC-rps12)
	36	1159315	P	36	134741	-1	1.43e-10	AAACCGTACATGAGATTTTCATCTCATACGGC	SSC; ndhA intron	IRa; IGS (trnV-GAC-rps12)
	32	103826	P	32	126109	-3	4.52e-05	TCATTGTTCAAATCTTTGACAACACGAAAAAA	IRb; IGS (rrn4.5-rrn5)	IRa; IGS (rrn5-rrn4.5)
	32	103857	P	32	126140	-3	4.52e-05	CATTGTTCAACTCTCTGACAACATGAAAAAAC	IRb; IGS (rrn4.5-rrn5)	IRa; IGS (rrn5-rrn4.5)
	31	124	P	31	6989	-3	0.000164	CTTTTTTTAACTCTTTTTTATATTTTTTTGT	LSC; IGS(trnH-GUG-psbA)	LSC; IGS(trnS-GCU-trnG-UCC)
	30	115946	P	30	137794	-3	0.000593	ACATGAGATTTTCATCTCATACGGCTCCTC	SSC; ndhA intron	IRa; ndhB intron

## Sheet: G. straminea
Table S1 Analysis of palindromic repeats and dispersed repeats in eight Gentiana chloroplast genomes
	Length of the 1st repeat	Starting position of the 1st repeat	Direction	Length of the 2nd repeat	Starting position of the 2nd repeat	Distance between the repeats	Evalue	Repeat sequences	RegionA	RegionB
Dispersed repeats	38	42476	F	38	95339	0	8.26e-14	TCAGAACCGTACATGAGATTTTCACCTCATACGGCTCC	LSC; ycf3 intron	IRb; IGS (rps12-trnV-GAC)
	36	88498	F	36	88513	0	1.32e-12	GTTGATGATATCAATATTGATGATATCAATATTGAT	IRb; CDS (ycf2)	IRb; CDS (ycf2)
	36	141682	F	36	141697	0	1.32e-12	GCATCAATATTGATATCATCAATATTGATATCATCA	IRa; CDS (ycf2)	IRa; CDS (ycf2)
	36	95342	F	36	116065	-1	1.43e-10	GAACCGTACATGAGATTTTCACCTCATACGGCTCCT	IRb; IGS (rps12-trnV-GAC)	SSC; ndhA intron
	38	37357	F	38	39581	-2	5.23e-10	AGCAATAGCTAAATGATGATGGGCAATATCAGTTAGCC	LSC; CDS (psaB)	LSC; CDS (psaA)
	35	42479	F	35	116065	-1	5.55e-10	GAACCGTACATGAGATTTTCACCTCATACGGCTCC	LSC; ycf3 intron	SSC; ndhA intron
	38	92285	F	38	116062	-3	1.88e-08	TCAAAACCGTGCATGAGACTTTCATCTCACACGGCTCC	IRb; ndhB intron	SSC; ndhA intron
	32	103944	F	32	103975	-3	4.53e-05	TCATTGTTCAAATCTTTGACAACACGAAAAAA	IRb; IGS (rrn4.5-rrn5)	IRb; IGS (rrn4.5-rrn5)
	32	126224	F	32	126255	-3	4.53e-05	GGTTTTTTCATGTTGTCAGAGAGTTGAACAAT	IRa; IGS (rrn5-rrn4.5)	IRa; IGS (rrn5-rrn4.5)
	31	122625	F	31	122646	-3	0.000164	TTACTATTATTACTATTAGTAATAGTTTTTT	SSC; CDS (ycf1)	SSC; CDS (ycf1)
	30	6916	F	30	6941	-3	0.000594	TATATAGATATTATATGGATATGTACACAT	LSC; IGS(trnS-GCU-trnG-UCC)	LSC; IGS(trnS-GCU-trnG-UCC)
	30	8178	F	30	35062	-3	0.000594	AACGATGCGGGTTCGATTCCCGCTACCCGC	LSC; trnG-UCC	LSC; trnG-GCC
	30	92295	F	30	116072	-3	0.000594	GCATGAGACTTTCATCTCACACGGCTCCTA	IRb; ndhB intron	SSC; ndhA intron
Palindromic repeats	38	116062	P	38	137908	-3	1.88e-08	CCAAAACCGTACATGAGATTTTCATCTCATACGGCTCC	SSC; ndhA intron	IRa; ndhB intron
	32	8515	P	32	120936	-1	3.25e-08	AAATTCCTTTTTTTGTTAAGACCGAAATCAAA	LSC; IGS(trnR-UCU-atpA)	SSC; CDS (ycf1)
	30	12790	P	30	12790	-2	2.12e-05	ATATTTTATTTCAATTAGTTGAAATAAAAT	LSC; IGS(atpH-atpI)	LSC; IGS(atpH-atpI)
	32	6778	P	32	43867	-3	4.53e-05	GAAGAGGAAAGAAAGGGATTCGAACCCTCGGT	LSC; trnS-GCU	LSC; trnS-GGA
	32	34238	P	32	43870	-3	4.53e-05	AACAAAAGGGAGAGAGAGGGATTCGAACCCTC	LSC; trnS-UGA	LSC; trnS-GGA
	38	42476	P	38	134854	0	8.26e-14	TCAGAACCGTACATGAGATTTTCACCTCATACGGCTCC	LSC; ycf3 intron	IRa; IGS (trnV-GAC-rps12)
	36	88498	P	36	141682	0	1.32e-12	GTTGATGATATCAATATTGATGATATCAATATTGAT	IRb; CDS (ycf2)	IRa; CDS (ycf2)
	36	88513	P	36	141697	0	1.32e-12	ATTGATGATATCAATATTGATGATATCAATATTGAT	IRb; CDS (ycf2)	IRa; CDS (ycf2)
	36	116065	P	36	134853	-1	1.43e-10	AAACCGTACATGAGATTTTCATCTCATACGGCTCCT	SSC; ndhA intron	IRa; IGS (trnV-GAC-rps12)
	32	103944	P	32	126224	-3	4.53e-05	TCATTGTTCAAATCTTTGACAACACGAAAAAA	IRb; IGS (rrn4.5-rrn5)	IRa; IGS (rrn5-rrn4.5)
	32	103975	P	32	126255	-3	4.53e-05	CATTGTTCAACTCTCTGACAACATGAAAAAAC	IRb; IGS (rrn4.5-rrn5)	IRa; IGS (rrn5-rrn4.5)
	31	124	P	31	7019	-3	0.000164	ATTTTTTTAACTCTTTTTTATATTTTTTTGT	LSC; IGS(trnH-GUG-psbA)	LSC; IGS(trnS-GCU-trnG-UCC)
	30	116072	P	30	137906	-3	0.000594	ACATGAGATTTTCATCTCATACGGCTCCTC	SSC; ndhA intron	IRa; ndhB intron

## Sheet: G. dahurica
Table S1 Analysis of palindromic repeats and dispersed repeats in eight Gentiana chloroplast genomes
	Length of the 1st repeat	Starting position of the 1st repeat	Direction	Length of the 2nd repeat	Starting position of the 2nd repeat	Distance between the repeats	Evalue	Repeat sequences	RegionA	RegionB
Dispersed repeats	38	42398	F	38	95253	0	8.24e-14	TCAGAACCGTACATGAGATTTTCACCTCATACGGCTCC	LSC; ycf3 intron	IRb; IGS (rps12-trnV-GAC)
	38	88410	F	38	88425	0	8.24e-14	TTATTGATGATATCAATATTGATGATATCAATATTGAT	IRb; CDS (ycf2)	IRb; CDS (ycf2)
	38	141494	F	38	141509	0	8.24e-14	GCATCAATATTGATATCATCAATATTGATATCATCAAT	IRa; CDS (ycf2)	IRa; CDS (ycf2)
	36	95256	F	36	115920	-1	1.42e-10	GAACCGTACATGAGATTTTCACCTCATACGGCTCCT	IRb; IGS (rps12-trnV-GAC)	SSC; ndhA intron
	38	37278	F	38	39502	-2	5.21e-10	AGCAATAGCTAAATGATGATGGGCAATA	LSC; CDS (psaB)	LSC; CDS (psaA)
	35	42401	F	35	115920	-1	5.54e-10	GAACCGTACATGAGATTTTCACCTCATACGGCTCC	LSC; ycf3 intron	SSC; ndhA intron
	38	92199	F	38	115917	-3	1.88e-08	TCAAAACCGTGCATGAGACTTTCATCTCACACGGCTCC	IRb; ndhB intron	SSC; ndhA intron
	32	103796	F	32	103827	-3	4.52e-05	TCATTGTTCAAATCTTTGACAACACGAAAAAA	IRb; IGS (rrn4.5-rrn5)	IRb; IGS (rrn4.5-rrn5)
	32	126098	F	32	126129	-3	4.52e-05	GGTTTTTTCATGTTGTCAGAGAGTTGAACAAT	IRb; IGS (rrn5-rrn4.5)	IRb; IGS (rrn5-rrn4.5)
	30	8156	F	30	34977	-3	0.000592	AACGATGCGGGTTCGATTCCCGCTACCCGC	LSC; trnG-UCC	LSC; trnG-GCC
	30	92209	F	30	115927	-3	0.000592	GCATGAGACTTTCATCTCACACGGCTCCTA	IRb; ndhB intron	SSC; ndhA intron
Palindromic repeats	38	115917	P	38	137720	-3	1.88e-08	CCAAAACCGTACATGAGATTTTCATCTCATACGGCTCC	SSC; ndhA intron	IRa; ndhB intron
	32	8493	P	32	120791	-1	3.24e-08	AAATTCCTTTTTTTGTTAAGACCGAAATCAAA	LSC; IGS(trnR-UCU-atpA)	SSC; CDS (ycf1)
	30	12769	P	30	12769	-2	2.11e-05	ATATTTTATTTCAATTAGTTGAAATAAAAT	LSC; IGS(atpH-atpI)	LSC; IGS(atpH-atpI)
	32	6784	P	32	43795	-3	4.52e-05	GAAGAGGAAAGAAAGGGATTCGAACCCTCGGT	LSC; trnS-GCU	LSC; trnS-GGA
	32	34153	P	32	43798	-3	4.52e-05	AACAAAAGGGAGAGAGAGGGATTCGAACCCTC	LSC; trnS-UGA	LSC; trnS-GGA
	38	42398	P	38	134666	0	8.24e-14	TCAGAACCGTACATGAGATTTTCACCTCATACGGCTCC	LSC; ycf3 intron	IRa; IGS (trnV-GAC-rps12)
	38	88410	P	38	141494	0	8.24e-14	TTATTGATGATATCAATATTGATGATATCAATATTGAT	IRb; CDS (ycf2)	IRa; CDS (ycf2)
	38	88425	P	38	141509	0	8.24e-14	ATATTGATGATATCAATATTGATGATATCAATATTGAT	IRb; CDS (ycf2)	IRa; CDS (ycf2)
	36	115920	P	36	134665	-1	1.42e-10	AAACCGTACATGAGATTTTCATCTCATACGGCTCCT	SSC; ndhA intron	IRa; IGS (trnV-GAC-rps12)
	32	103796	P	32	126098	-3	4.52e-05	TCATTGTTCAAATCTTTGACAACACGAAAAAA	IRb; IGS (rrn4.5-rrn5)	IRa; IGS (rrn5-rrn4.5)
	32	103827	P	32	126129	-3	4.52e-05	CATTGTTCAACTCTCTGACAACATGAAAAAAC	IRb; IGS (rrn4.5-rrn5)	IRa; IGS (rrn5-rrn4.5)
	31	124	P	31	7000	-3	0.000164	CTTTTTTTAACTCTTTTTTATATTTTTTTGT	LSC; IGS(trnH-GUG-psbA)	LSC; IGS(trnS-GCU-trnG-UCC)
	30	115927	P	30	137718	-3	0.000592	ACATGAGATTTTCATCTCATACGGCTCCTC	SSC; ndhA intron	IRa; ndhB intron

## Sheet: G. tibetica
Table S1 Analysis of palindromic repeats and dispersed repeats in eight Gentiana chloroplast genomes
	Length of the 1st repeat	Starting position of the 1st repeat	Direction	Length of the 2nd repeat	Starting position of the 2nd repeat	Distance between the repeats	Evalue	Repeat sequences	RegionA	RegionB
Dispersed repeats	41	88419	F	41	88434	0	1.29e-15	CTTATTGATGATATCAATATTGATGATATCAATATTGATGA	IRb; CDS (ycf2)	IRb; CDS (ycf2)
	41	141453	F	41	141468	0	1.29e-15	CTATCATCAATATTGATATCATCAATATTGATATCATCAAT	IRa; CDS (ycf2)	IRa; CDS (ycf2)
	38	42404	F	38	95257	0	8.24e-14	TCAGAACCGTACATGAGATTTTCACCTCATACGGCTCC	LSC; ycf3 intron	IRb; IGS (rps12-trnV-GAC)
	41	117	F	41	143	-2	9.5e-12	CTATTTTCTTTTTTTAACTCTTTTTTATATTTTCTTTTTTT	LSC; IGS(trnH-GUG-psbA)	LSC; IGS(trnH-GUG-psbA)
	36	95260	F	36	115903	-1	1.42e-10	GAACCGTACATGAGATTTTCACCTCATACGGCTCCT	IRb; IGS (rps12-trnV-GAC)	SSC; ndhA intron
	38	37283	F	38	39507	-2	5.21e-10	AGCAATAGCTAAATGATGATGGGCAATATCAGTTAGCC	LSC; CDS (psaB)	LSC; CDS (psaA)
	35	42407	F	35	115903	-1	5.54e-10	GAACCGTACATGAGATTTTCACCTCATACGGCTCC	LSC; ycf3 intron	SSC; ndhA intron
	38	92202	F	38	115900	-3	1.88e-08	TCAAAACCGTGCATGAGACTTTCATCTCACACGGCTCC	IRb; ndhB intron	SSC; ndhA intron
	31	65343	F	31	65352	-1	1.26e-07	TCAAGTAAGGCAAGTAAGGCAAGTAAGGGAA	LSC; IGS(rpl33-rps18)	LSC; IGS(rpl33-rps18)
	32	103818	F	32	103849	-3	4.52e-05	TCATTGTTCAAATCTTTGACAACACGAAAAAA	IRb; IGS (rrn4.5-rrn5)	IRb; IGS (rrn4.5-rrn5)
	32	126047	F	32	126078	-3	4.52e-05	GGTTTTTTCATGTTGTCAGAGAGTTGAACAAT	IRa; IGS (rrn5-rrn4.5)	IRa; IGS (rrn5-rrn4.5)
	30	88419	F	30	88449	-3	0.000592	TTATTGATGATATCAATATTGATGATATCA	IRb; CDS (ycf2)	IRb; CDS (ycf2)
	30	8083	F	30	34982	-3	0.000592	AACGATGCGGGTTCGATTCCCGCTACCCGC	LSC; trnG-UCC	LSC; trnG-GCC
	30	92212	F	30	115910	-3	0.000592	GCATGAGACTTTCATCTCACACGGCTCCTA	IRb; CDS (ndhB)	SSC; ndhA intron
	30	141453	F	30	141483	-3	0.000592	CTATCATCAATATTGATATCATCAATATTG	IRa; CDS (ycf2)	IRa; CDS (ycf2)
	30	30047	C	30	34872	-3	0.000592	GTATTCTATATATATATTCTGTATATGATA	LSC; IGS(trnE-UUC-trnT-GGU)	LSC; IGS(psbZ-trnG-GCC)
Palindromic repeats	41	88434	P	41	141468	0	1.29e-15	ATATTGATGATATCAATATTGATGATATCAATATTGATGAT	IRb; CDS (ycf2)	IRa; CDS (ycf2)
	38	42404	P	38	134633	0	8.24e-14	TCAGAACCGTACATGAGATTTTCACCTCATACGGCTCC	LSC; ycf3 intron	IRa; IGS (trnV-GAC-rps12)
	44	12686	P	44	12686	-2	1.71e-13	CATTCTTATATTTTATTTCAATTAGTTGAAATAAAATATAAGAA	LSC; IGS(atpH-atpI)	LSC; IGS(atpH-atpI)
	36	115903	P	36	134632	-1	1.42e-10	AAACCGTACATGAGATTTTCATCTCATACGGCTCCT	SSC; ndhA intron	IRa; IGS (trnV-GAC-rps12)
	32	8420	P	32	120774	0	3.37e-10	AAATTCCTTTTTTTGTTAAGACCGAAATCAAA	LSC; IGS(trnR-UCU-atpA)	SSC; CDS (ycf1)
	38	115900	P	38	137688	-3	1.88e-08	CCAAAACCGTACATGAGATTTTCATCTCATACGGCTCC	SSC; ndhA intron	IRa; ndhB intron
	41	88419	P	41	141453	0	1.29e-15	TTATTGATGATATCAATATTGATGATATCAATATTGATGAT	IRb; CDS (ycf2)	IRa; CDS (ycf2)
	30	250	P	30	250	-2	2.11e-05	TATCTTAGTTACCAATATTGGTAACTAATA	LSC; IGS(trnH-GUG-psbA)	LSC; IGS(trnH-GUG-psbA)
	32	6722	P	32	43795	-3	4.52e-05	GAAGAGGAAAGAAAGGGATTCGAACCCTCGGT	LSC; trnS-GCU	LSC; trnS-GGA
	32	34108	P	32	43798	-3	4.52e-05	AACAAAAGGGAGAGAGAGGGATTCGAACCCTC	LSC; trnS-UGA	LSC; trnS-GGA
	32	103818	P	32	126047	-3	4.52e-05	TCATTGTTCAAATCTTTGACAACACGAAAAAA	IRb; IGS (rrn4.5-rrn5)	IRa; IGS (rrn5-rrn4.5)
	32	103849	P	32	126078	-3	4.52e-05	ACATTGTTCAACTCTCTGACAACATGAAAAAA	IRb; IGS (rrn4.5-rrn5)	IRa; IGS (rrn5-rrn4.5)
	31	150	P	31	6938	-3	0.000164	CTTTTTTTAACTCTTTTTTATATTTTTTTGT	LSC; IGS(trnH-GUG-psbA)	LSC; IGS(trnS-GCU-trnG-UCC)
	30	88419	P	30	141449	-3	0.000592	TTATTGATGATATCAATATTGATGATATCA	IRb; CDS (ycf2)	IRa; CDS (ycf2)
	30	88449	P	30	141479	-3	0.000592	ATATTGATGATATCAATATTGATGATAGTG	IRb; CDS (ycf2)	IRa; CDS (ycf2)
	30	115910	P	30	137686	-3	0.000592	ACATGAGATTTTCATCTCATACGGCTCCTC	SSC; ndhA intron	IRa; ndhB intron
