# Supplementary material for: Comparative Chloroplast Genome Analyses of Species in Gentiana section Cruciata (Gentianaceae) and the Development of Authentication Markers
Source: Int J Mol Sci. 2018 Jul 5;19(7):1962. doi: 10.3390/ijms19071962 (PMC6073106; doi:10.3390/ijms19071962)
Supplement: Supplementary file 1 [file ijms-19-01962-s001.zip › Supplementary Materials/Table S2.xlsx]

## Sheet: G. crassicaulis
Table S2 Analysis of tandem repeats in eight Gentiana chloroplast genomes
No	Size(bp)	Repeat sequence	Repeat number	Start position	Region
1	26	TATTTTCTTTTTTTAACTCTTTTTTA	2	118	LSC; IGS; (psbA-trnH-GUG)
2	15	TATTGATGATATCAA	3	88421	IRb; CDS; (ycf2)
3	31	CATTGTTCAAATCTCTGACAACACGAAAAAA	2	103825	IRb; IGS; (rrn4.5-rrn5)
4	31	GTTTTTTCGTGTTGTCAAAGATTTGAACAAT	2	126078	LSC; IGS; (trnL-UAA-trnF-GAA)
5	15	TATCATCAATATTGA	3	141465	IRa; CDS; (ycf2)

## Sheet: G. robusta
Table S2 Analysis of tandem repeats in eight Gentiana chloroplast genomes
No	Size(bp)	Repeat sequence	Repeat number	Start position	Region
1	25	ATAGATATTATATGGATATGTACAC	2	6915	LSC; IGS; (trnS-GCU-trnG-UCC)
2	15	TTGATGATATCAATA	3	88422	IRb; CDS; (ycf2)
3	18	ATATTGATGCTAGTGACG	2	88464	IRb; CDS; (ycf2)
4	31	CATTGTTCAACTCTCTGACAACATGAAAAAA	2	103869	IRb; IGS; (rrn4.5-rrn5)
5	21	TTACTATTAGTAATAGTTTTT	2	122554	LSC; CDS; (ycf1)
6	31	GTTTTTTCGTGTTGTCAAAGATTTGAACAAT	2	126145	IRa; IGS; (rrn4.5-rrn5)
7	18	ATATCGTCACTAGCATCA	2	141573	IRa; CDS; (ycf2)
8	15	CATCAATATTGATAT	3	141604	IRa; CDS; (ycf2)

## Sheet: G. macrophylla
Table S2 Analysis of tandem repeats in eight Gentiana chloroplast genomes
No	Size(bp)	Repeat sequence	Repeat number	Start position	Region
1	26	TATTTTCTTTTTTTAACTCTTTTTTA	2	419	LSC; IGS; (psbA-trnH-GUG)
2	71	TATATTTTTTTGTTTTACTAGTTTTTTTAGAACTTAGTTATATTGTAATGTCAATATTTTAATAT AGATAA	2	469	LSC; IGS; (psbA-trnH-GUG)
3	30	AGCAACCAAGAGTCTACCGCTGCTGTCTGT	2	30432	LSC; IGS; (trnE-UUC-trnT-GGU)
4	30	AATATAATATGATAATAGATCTATATTATC	3	30539	LSC; IGS; (trnE-UUC-trnT-GGU)
5	52	ATATGATATGTAAATATGTAATATAATATGATAATAGATCTATATTATCA	2	30520	LSC; IGS; (trnE-UUC-trnT-GGU)
6	56	ATCAATATTACTTTCTAGTGATATTAAGTCTATTACCAAAAATTGTGTATCCAAT	2	31322	LSC; IGS; (trnT-GGU-psbD)
7	73	CATATATCCGTGTATATGCTCCAGCGCGCCCTTATGTACGAAGAAAGTGGTAAAGGATTAGTCATAAGTCATT	2	34829	LSC; IGS; (trnS-UGA-psbZ)
8	97	ATTCATTTATAGGTTATTTATTTATAGGTTATAGGAAAAACAAATATTTCTATTTCTTTTTTTCG ATGCGAATATAGTGTATAATAGTGTATAGTGA	2	55510	LSC; IGS; (rbcL-accD)
9	15	TATTGATGATATCAA	3	89048	IRb; CDS; (ycf2)
10	18	ATATTGATGCTAGTGACG	2	89092	IRb; CDS; (ycf2)
11	31	CATTGTTCAAATCTCTGACAACACGAAAAAA	2	104502	IRb; IGS; (rrn4.5-rrn5)
12	31	GTTTTTTCATGTTGTCAGAGAGTTGAACAAT	2	126806	IRb; IGS; (rrn4.5-rrn5)
13	18	ATATCGTCACTAGCATCA	2	142239	IRa; CDS; (ycf2)
14	15	CATCAATATTGATAT	3	142270	IRa; CDS; (ycf2)
15	11	AAAAACAAAAA	4	149488	LSC; IGS; (rpl2-trnH-GUG)

## Sheet: G. siphonantha
Table S2 Analysis of tandem repeats in eight Gentiana chloroplast genomes
No	Size(bp)	Repeat sequence	Repeat number	Start position	Region
1	15	TATTGATGATATCAA	3	88379	IRb; CDS; (ycf2)
2	18	ATATTGATGCTAGTGACG	2	88423	IRb; CDS; (ycf2)
3	31	CATTGTTCAAATCTTTGACAACACGAAAAAA	2	103830	IRb; IGS; (rrn4.5-rrn5)
4	24	ACAAGGATTTAAATTTAAATTATG	2	122834	LSC; CDS; (ycf1)
5	31	GTTTTTTCGTGTTGTCAAAGATTTGAACAAT	2	126138	IRb; IGS; (rrn4.5-rrn5)
6	18	ATATCGTCACTAGCATCA	2	141568	IRa; CDS; (ycf2)
7	15	CATCAATATTGATAT	3	141599	IRa; CDS; (ycf2)

## Sheet: G. officinalis
Table S2 Analysis of tandem repeats in eight Gentiana chloroplast genomes
No	Size(bp)	Repeat sequence	Repeat number	Start position	Region
1	15	TATTGATGATATCAA	3	88376	IRb; CDS; (ycf2)
2	18	ATATTGATGCTAGTGACG	2	88420	IRb; CDS; (ycf2)
3	31	CATTGTTCAAATCTTTGACAACACGAAAAAA	2	103827	IRb; IGS; (rrn4.5-rrn5)
4	31	GTTTTTTCGTGTTGTCAAAGATTTGAACAAT	2	126141	IRb; IGS; (rrn4.5-rrn5)
5	18	ATATCGTCACTAGCATCA	2	141540	IRa; CDS; (ycf2)
6	15	CATCAATATTGATAT	3	141571	IRa; CDS; (ycf2)

## Sheet: G. straminea
Table S2 Analysis of tandem repeats in eight Gentiana chloroplast genomes
No	Size(bp)	Repeat sequence	Repeat number	Start position	Region
1	25	ATAGATATTATATGGATATGTACAC	2	6919	LSC; IGS; (trnS-GCU-trnG-UCC)
2	15	TTGATGATATCAATA	3	88499	IRb; CDS; (ycf2)
3	18	ATATTGATGCTAGTGACG	2	88541	IRb; CDS; (ycf2)
4	31	CATTGTTCAACTCTCTGACAACATGAAAAAA	2	103945	IRb; IGS; (rrn4.5-rrn5)
5	21	TTACTATTAGTAATAGTTTTT	2	122634	LSC; CDS; (ycf1)
6	31	GTTTTTTCGTGTTGTCAAAGATTTGAACAAT	2	126225	IRa; IGS; (rrn4.5-rrn5)
7	18	ATATCGTCACTAGCATCA	2	141652	IRa; CDS; (ycf2)
8	15	CATCAATATTGATAT	3	141683	IRa; CDS; (ycf2)

## Sheet: G. dahurica
Table S2 Analysis of tandem repeats in eight Gentiana chloroplast genomes
No	Size(bp)	Repeat sequence	Repeat number	Start position	Region
1	15	TATTGATGATATCAA	3	88411	IRb; CDS; (ycf2)
2	18	ATATTGATGCTAGTGACG	2	88455	IRb; CDS; (ycf2)
3	31	CATTGTTCAAATCTTTGACAACACGAAAAAA	2	103797	IRb; IGS; (rrn4.5-rrn5)
4	31	GTTTTTTCGTGTTGTCAAAGATTTGAACAAT	2	126099	IRb; IGS; (rrn4.5-rrn5)
5	18	ATATCGTCACTAGCATCA	2	141464	IRa; CDS; (ycf2)
6	15	CATCAATATTGATAT	3	141495	IRa; CDS; (ycf2)

## Sheet: G. tibetica
Table S2 Analysis of tandem repeats in eight Gentiana chloroplast genomes
No	Size(bp)	Repeat sequence	Repeat number	Start position	Region
1	26	TATTTTCTTTTTTTAACTCTTTTTTA	2	118	LSC; IGS; (psbA-trnH-GUG)
2	15	TATTGATGATATCAA	3	88421	IRb; CDS; (ycf2)
3	31	CATTGTTCAAATCTCTGACAACACGAAAAAA	2	103819	IRb; IGS; (rrn4.5-rrn5)
4	31	GTTTTTTCGTGTTGTCAAAGATTTGAACAAT	2	126048	LSC; IGS; (trnL-UAA-trnF-GAA)
5	15	TATCATCAATATTGA	3	141454	IRa; CDS; (ycf2)
