# Supplementary material for: Comparative Chloroplast Genome Analyses of Species in Gentiana section Cruciata (Gentianaceae) and the Development of Authentication Markers
Source: Int J Mol Sci. 2018 Jul 5;19(7):1962. doi: 10.3390/ijms19071962 (PMC6073106; doi:10.3390/ijms19071962)
Supplement: Supplementary file 1 [file ijms-19-01962-s001.zip › Supplementary Materials/Table S3.xlsx]

## Sheet: G. crassicaulis
Table S3 List of simple sequence repeats in eight Gentiana chloroplast genomes.
SSR	Size	Start position	Location
(A)11	11	4459	LSC	IGS(trnK-UUU-trnQ-UUG)
(T)10	10	6471	LSC	IGS(psbK-psbI)
(A)10	10	6698	LSC	IGS(psbI-trnS-GCU)
(A)12	12	6962	LSC	IGS(trnS-GCU-trnG-UCC)
(A)10	10	17021	LSC	CDS(rpoC2)
(T)11	11	19237	LSC	CDS(rpoC1)
(TTTAAG)3	18	20910	LSC	Intron(rpoC1)
(A)11	11	26519	LSC	IGS(trnC-GCA-petN)
(TAAA)3	12	28293	LSC	IGS(petN-psbM)
(T)12	12	28915	LSC	IGS(psbM-trnD-GUC)
(TA)5	10	30055	LSC	IGS(trnE-UCC-trnT-GGU)
(AATA)3	12	30990	LSC	IGS(trnT-GGU-psbD)
(T)12	12	33967	LSC	IGS(psbC-trnS-UGA)
(AT)5	10	34880	LSC	IGS(psbZ-trnG-GCC)
(AATT)3	12	35211	LSC	IGS(trnG-GCC-trnfM-CAU)
(A)10	10	43073	LSC	Intron2(ycf3)
(A)10	10	45333	LSC	IGS(trnT-UGU-trnL-UAA)
(AT)6	12	45637	LSC	IGS(trnT-UGU-trnL-UAA)
(TA)5	10	46502	LSC	IGS(trnL-UAA-trnF-GAA)
(T)10	10	52414	LSC	CDS(atpB)
(TTAT)3	12	54963	LSC	IGS(rbcL-accD)
(ATA)4	12	64242	LSC	IGS(trnP-UGG-psaJ)
(A)11	11	65946	LSC	IGS(rps18-rpl20)
(A)10	10	75308	LSC	IGS(petD-rpoA)
(T)10	10	81284	Irb	IGS(rps18-rpl20)
(TATG)3	12	83212	Irb	IGS(rpl23-trnI-CAU)
(A)10	10	93654	Irb	IGS(ndhB-rps7)
(TTG)4	12	108511	SSC	CDS(ndhF)
(T)11	11	108928	SSC	IGS(ndhF-rpl32)
(AGGA)3	12	108988	SSC	IGS(ndhF-rpl32)
(A)10	10	109719	SSC	IGS(rpl32-trnL-UAG)
(A)11	11	112916	SSC	IGS(ndhD-psaC)
(T)11	11	119808	SSC	CDS(ycf1)
(T)11	11	121290	SSC	CDS(ycf1)
(T)10	10	121362	SSC	CDS(ycf1)
(T)11	11	121531	SSC	CDS(ycf1)
(T)10	10	123022	SSC	CDS(ycf1)
(T)11	11	123406	SSC	CDS(ycf1)
(T)10	10	136278	Ira	IGS(rps7-ndhB)
(CATA)3	12	146718	Ira	IGS(trnI-CAU-rpl23)
(A)10	10	148648	Ira	IGS(rpl2-trnH-GUG)

## Sheet: G. robusta
Table S3 List of simple sequence repeats in eight Gentiana chloroplast genomes.
SSR	Size	Start position	Location
(A)12	12	4446	LSC	IGS(trnK-UUU-trnQ-UUG)
(A)10	10	4741	LSC	IGS(trnK-UUU-trnQ-UUG)
(T)10	10	6524	LSC	IGS(psbK-psbI)
(A)15	15	7039	LSC	IGS(trnS-GCU-trnG-UCC)
(A)10	10	17112	LSC	CDS(rpoC2)
(T)11	11	19328	LSC	CDS(rpoC1)
(A)11	11	26432	LSC	IGS(rpoB-trnC-GCA)
(TAAA)3	12	28379	LSC	IGS(petN-psbM)
(T)17	17	29024	LSC	IGS(psbM-trnD-GUC)
(TA)5	10	30178	LSC	IGS(trnE-UCC-trnT-GGU)
(AATA)3	12	31108	LSC	IGS(trnT-GGU-psbD)
(T)12	12	34085	LSC	IGS(psbC-trnS-UGA)
(AATT)3	12	35273	LSC	IGS(trnG-GCC-trnfM-CAU)
(A)10	10	43133	LSC	Intron2(ycf3)
(AT)6	12	45696	LSC	IGS(trnT-UGU-trnL-UAA)
(TA)5	10	46560	LSC	IGS(trnL-UAA-trnF-GAA)
(T)10	10	49387	LSC	IGS(ndhC-trnV-UAC)
(T)10	10	52482	LSC	CDS(atpB)
(TTAT)3	12	55016	LSC	IGS(rbcL-accD)
(ATA)4	12	64254	LSC	IGS(trnP-UGG-psaJ)
(A)11	11	65944	LSC	IGS(rps18-rpl20)
(T)10	10	81284	Irb	IGS(rps19-rpl2)
(TATG)3	12	83211	Irb	IGS(rpl23-trnI-CAU)
(A)10	10	93653	Irb	IGS(ndhB-rps7)
(TTG)4	12	108573	SSC	CDS(ndhF)
(T)13	13	108990	SSC	IGS(ndhF-rpl32)
(AGGA)3	12	109052	SSC	IGS(ndhF-rpl32)
(A)11	11	109783	SSC	IGS(rpl32-trnL-UAG)
(A)14	14	112980	SSC	IGS(ndhD-psaC)
(T)11	11	119884	SSC	CDS(ycf1)
(T)11	11	121366	SSC	CDS(ycf1)
(T)10	10	121438	SSC	CDS(ycf1)
(T)10	10	123095	SSC	CDS(ycf1)
(T)11	11	123398	SSC	CDS(ycf1)
(T)11	11	123479	SSC	CDS(ycf1)
(T)10	10	136414	Ira	IGS(rps7-ndhB)
(CATA)3	12	146854	Ira	IGS(trnI-CAU-rpl23)
(A)10	10	148783	Ira	IGS(rpl2-trnH-GUG)

## Sheet: G. macrophylla 
Table S3 List of simple sequence repeats in eight Gentiana chloroplast genomes.
SSR	Size	Start position	Location
(A)10	10	173	LSC	IGS(rpl2-trnH-GUG)
(T)10	10	6878	LSC	IGS(psbK-psbI)
(A)11	11	7107	LSC	IGS(psbI-trnS-GCU)
(A)12	12	7372	LSC	IGS(trnS-GCU-trnG-UCC)
(A)10	10	17446	LSC	CDS(rpoC2)
(T)11	11	19662	LSC	CDS(rpoC1)
(TTTAAG)3	18	21335	LSC	Intron(rpoC1)
(A)10	10	26770	LSC	IGS(rpoB-trnC-GCA)
(A)10	10	26947	LSC	IGS(trnC-GCA-petN)
(TAAA)3	12	28730	LSC	IGS(petN-psbM)
(T)12	12	29354	LSC	IGS(psbM-trnD-GUC)
(TA)5	10	30504	LSC	IGS(trnE-UCC-trnT-GGU)
(AATA)3	12	31516	LSC	IGS(trnT-GGU-psbD)
(T)12	12	34493	LSC	IGS(psbC-trnS-UGA)
(AT)5	10	35432	LSC	IGS(psbZ-trnG-GCC)
(AATT)3	12	35763	LSC	IGS(trnG-GCC-trnfM-CAU)
(A)10	10	43627	LSC	Intron2(ycf3)
(A)13	13	43890	LSC	IGS(ycf3-trnS-GGA)
(AT)6	12	46195	LSC	IGS(trnT-UGU-trnL-UAA)
(TA)5	10	47060	LSC	IGS(trnL-UAA-trnF-GAA)
(T)10	10	49879	LSC	IGS(ndhC-trnV-UAC)
(T)10	10	52974	LSC	CDS(atpB)
(CTTT)3	12	53274	LSC	IGS(atpB-rbcL)
(T)11	11	53327	LSC	IGS(atpB-rbcL)
(TTAT)3	12	55523	LSC	CDS(rbcL-accD)
(TTAT)3	12	55620	LSC	CDS(rbcL-accD)
(A)10	10	61325	LSC	IGS(petA-psbJ）
(T)11	11	64178	LSC	IGS(petL-petG)
(ATA)4	12	64853	LSC	IGS(trnP-UGG-psaJ)
(T)10	10	65388	LSC	IGS(psaJ-rpl33)
(A)10	10	65431	LSC	IGS(psaJ-rpl33)
(A)11	11	66558	LSC	IGS(rps18-rpl20)
(A)10	10	75924	LSC	IGS(petD-rpoA)
(T)10	10	81911	LSC	IGS(rps19-rpl2)
(TATG)3	12	83839	Irb	IGS(rpl23-trnI-CAU)
(A)10	10	94281	Irb	IGS(ndhB-rps7)
(TTG)4	12	109213	SSC	CDS(ndhF)
(T)15	15	109631	SSC	IGS(ndhF-rpl32)
(AGGA)3	12	109695	SSC	IGS(ndhF-rpl32)
(A)10	10	110426	SSC	IGS(rpl32-trnL-UAG)
(A)11	11	113623	SSC	IGS(ndhD-psaC)
(T)11	11	120525	SSC	CDS(ycf1)
(T)11	11	122007	SSC	CDS(ycf1)
(T)10	10	122079	SSC	CDS(ycf1)
(T)11	11	122248	SSC	CDS(ycf1)
(T)11	11	123748	SSC	CDS(ycf1-trnN-GUU)
(T)11	11	124052	SSC	CDS(ycf1-trnN-GUU)
(T)11	11	124133	SSC	CDS(ycf1-trnN-GUU)
(T)10	10	137080	Ira	IGS(rps7-ndhB)
(CATA)3	12	147520	Ira	CDS(ycf2)
(ATAAA)3	15	149457	LSC	IGS(rpl2-trnH-GUG)
(A)15	15	149488	LSC	IGS(rpl2-trnH-GUG)
(A)10	10	149504	LSC	IGS(rpl2-trnH-GUG)
(A)10	10	149515	LSC	IGS(rpl2-trnH-GUG)

## Sheet: G. siphonantha
Table S3 List of simple sequence repeats in eight Gentiana chloroplast genomes.
SSR	Size	Start position	Location
(A)14	14	4448	LSC	IGS(trnK-UUU-trnQ-UUG)
(A)12	12	7013	LSC	IGS(trnS-GCU-trnG-UCC)
(A)10	10	17085	LSC	CDS(rpoC2)
(T)11	11	19301	LSC	CDS(rpoC1)
(A)11	11	26402	LSC	IGS(rpoB-trnC-GCA)
(TAAA)3	12	28360	LSC	IGS(petN-psbM)
(A)10	10	28970	LSC	IGS(psbM-trnD-GUC)
(T)13	13	29007	LSC	IGS(psbM-trnD-GUC)
(TA)5	10	30128	LSC	IGS(trnE-UCC-trnT-GGU)
(A)10	10	30351	LSC	IGS(trnT-GGU-psbD)
(AATA)3	12	31025	LSC	IGS(trnT-GGU-psbD)
(T)10	10	34002	LSC	IGS(psbC-trnS-UGA)
(AATT)3	12	35195	LSC	IGS(trnG-GCC-trnfM-CAU)
(A)11	11	43056	LSC	Intron2(ycf3)
(A)13	13	43320	LSC	IGS(ycf3-trnS-GGA)
(AT)6	12	45622	LSC	IGS(trnT-UGU-trnL-UAA)
(TA)5	10	46486	LSC	IGS(trnL-UAA-trnF-GAA)
(T)10	10	49367	LSC	IGS(ndhC-trnV-UAC)
(T)10	10	52462	LSC	CDS(atpB)
(TTAT)3	12	55004	LSC	IGS(rbcL-accD)
(T)10	10	58158	LSC	IGS(ycf4-cemA)
(T)10	10	63559	LSC	IGS(petL-petG)
(ATA)4	12	64231	LSC	IGS(trnP-UGG-psaJ)
(A)10	10	64808	LSC	IGS(psaJ-rpl33)
(A)11	11	65917	LSC	IGS(rps18-rpl20)
(TATG)3	12	83170	Irb	IGS(rpl23-trnI-CAU)
(TTG)4	12	108534	SSC	CDS(ndhF)
(T)13	13	108952	SSC	IGS(ndhF-rpl32)
(AGGA)3	12	109014	SSC	IGS(ndhF-rpl32)
(A)10	10	109745	SSC	IGS(rpl32-trnL-UAG)
(A)10	10	112941	SSC	IGS(ndhD-psaC)
(T)11	11	119841	SSC	CDS(ycf1)
(T)11	11	121323	SSC	CDS(ycf1)
(T)10	10	121395	SSC	CDS(ycf1)
(T)11	11	121564	SSC	CDS(ycf1)
(T)10	10	123088	SSC	CDS(ycf1)
(T)11	11	123391	SSC	CDS(ycf1)
(T)11	11	123472	SSC	CDS(ycf1)
(CATA)3	12	146849	Ira	IGS(trnI-CAU-rpl23)

## Sheet: G. officinalis
Table S3 List of simple sequence repeats in eight Gentiana chloroplast genomes.
SSR	Size	Start position	Location
(A)13	13	4448	LSC	IGS(trnK-UUU-trnQ-UUG)
(A)10	10	4744	LSC	IGS(trnK-UUU-trnQ-UUG)
(A)12	12	7013	LSC	IGS(trnS-GCU-trnG-UCC)
(A)10	10	17085	LSC	CDS(rpoC2)
(T)11	11	19301	LSC	CDS(rpoC1)
(A)10	10	26402	LSC	IGS(rpoB-trnC-GCA)
(TAAA)3	12	28358	LSC	IGS(petN-psbM)
(T)13	13	29004	LSC	IGS(psbM-trnD-GUC)
(TA)5	10	30125	LSC	IGS(trnE-UCC-trnT-GGU)
(AATA)3	12	31021	LSC	IGS(trnT-GGU-psbD)
(T)10	10	33998	LSC	IGS(psbC-trnS-UGA)
(AATT)3	12	35191	LSC	IGS(trnG-GCC-trnfM-CAU)
(A)10	10	43052	LSC	Intron2(ycf3)
(A)13	13	43315	LSC	IGS(ycf3-trnS-GGA)
(AT)6	12	45617	LSC	IGS(trnT-UGU-trnL-UAA)
(TA)5	10	46481	LSC	IGS(trnL-UAA-trnF-GAA)
(T)10	10	47128	LSC	IGS(trnF-GAA-ndhJ)
(T)10	10	49363	LSC	IGS(ndhC-trnV-UAC)
(T)10	10	52458	LSC	CDS(atpB)
(TTAT)3	12	55000	LSC	IGS(rbcL-accD)
(T)11	11	63554	LSC	IGS(petL-petG)
(ATA)4	12	64227	LSC	IGS(trnP-UGG-psaJ)
(A)11	11	65912	LSC	IGS(rps18-rpl20)
(T)10	10	81239	Irb	IGS(rps19-rpl2)
(TATG)3	12	83167	Irb	IGS(rpl23-trnI-CAU)
(TTG)4	12	108531	SSC	CDS(ndhF)
(T)12	12	108949	SSC	IGS(ndhF-rpl32)
(AGGA)3	12	109010	SSC	IGS(ndhF-rpl32)
(A)10	10	109741	SSC	IGS(rpl32-trnL-UAG)
(A)10	10	112937	SSC	IGS(ndhD-psaC)
(T)11	11	119837	SSC	CDS(ycf1)
(T)11	11	121319	SSC	CDS(ycf1)
(T)10	10	121391	SSC	CDS(ycf1)
(T)11	11	121560	SSC	CDS(ycf1)
(T)10	10	123060	SSC	CDS(ycf1)
(T)11	11	123363	SSC	CDS(ycf1)
(T)11	11	123444	SSC	CDS(ycf1)
(CATA)3	12	146821	Ira	IGS(trnI-CAU-rpl23)
(A)10	10	148751	Ira	IGS(rpl2-trnH-GUG)

## Sheet: G. straminea
Table S3 List of simple sequence repeats in eight Gentiana chloroplast genomes.
SSR	Size	Start position	Location	Location
(A)13	13	4446	LSC	IGS(trnK-UUU-trnQ-UUG)
(A)10	10	4742	LSC	IGS(trnK-UUU-trnQ-UUG)
(A)10	10	6011	LSC	IGS(trnQ-UUG-psbK)
(A)16	16	7043	LSC	IGS(trnS-GCU-trnG-UCC)
(A)10	10	17119	LSC	CDS(rpoC2)
(T)11	11	19335	LSC	CDS(rpoC1)
(A)11	11	26438	LSC	IGS(rpoB-trnC-GCA)
(TAAA)3	12	28393	LSC	IGS(petN-psbM)
(T)14	14	29038	LSC	IGS(psbM-trnD-GUC)
(TA)5	10	30189	LSC	IGS(trnE-UCC-trnT-GGU)
(A)10	10	30412	LSC	IGS(trnT-GGU-psbD)
(AATA)3	12	31120	LSC	IGS(trnT-GGU-psbD)
(T)11	11	34097	LSC	IGS(psbC-trnS-UGA)
(AATT)3	12	35285	LSC	IGS(trnG-GCC-trnfM-CAU)
(A)10	10	43145	LSC	Intron2(ycf3)
(AT)6	12	45707	LSC	IGS(trnT-UGU-trnL-UAA)
(TA)5	10	46571	LSC	IGS(trnL-UAA-trnF-GAA)
(T)10	10	47218	LSC	IGS(trnF-GAA-ndhJ)
(T)11	11	49453	LSC	IGS(ndhC-trnV-UAC)
(T)10	10	52549	LSC	CDS(atpB)
(TTAT)3	12	55090	LSC	IGS(rbcL-accD)
(T)10	10	63657	LSC	IGS(petL-petG)
(ATA)4	12	64329	LSC	IGS(trnP-UGG-psaJ)
(A)11	11	66018	LSC	IGS(rps18-rpl20)
(T)10	10	81360	Irb	IGS(rps19-rpl2)
(TATG)3	12	83288	Irb	IGS(rpl23-trnI-CAU)
(TTG)4	12	108649	SSC	CDS(ndhF)
(T)13	13	109067	SSC	IGS(ndhF-rpl32)
(AGGA)3	12	109129	SSC	IGS(ndhF-rpl32)
(A)12	12	109860	SSC	IGS(rpl32-trnL-UAG)
(A)15	15	113058	SSC	IGS(ndhD-psaC)
(T)11	11	119964	SSC	CDS(ycf1)
(T)11	11	121446	SSC	CDS(ycf1)
(T)10	10	121518	SSC	CDS(ycf1)
(T)10	10	123175	SSC	CDS(ycf1)
(T)11	11	123478	SSC	CDS(ycf1)
(T)11	11	123559	SSC	CDS(ycf1)
(CATA)3	12	146933	Ira	IGS(trnI-CAU-rpl23)
(A)10	10	148863	Ira	IGS(rpl2-trnH-GUG)

## Sheet: G. dahurica
Table S3 List of simple sequence repeats in eight Gentiana chloroplast genomes.
SSR	Size	Start position	Location	Location
(A)10	10	4463	LSC	IGS(trnK-UUU-trnQ-UUG)
(A)13	13	7024	LSC	IGS(trnS-GCU-trnG-UCC)
(A)10	10	17099	LSC	CDS(rpoC2)
(T)11	11	19315	LSC	CDS(rpoC1)
(TAAA)3	12	28373	LSC	IGS(petN-psbM)
(T)13	13	29019	LSC	IGS(psbM-trnD-GUC)
(TA)5	10	30140	LSC	IGS(trnE-UCC-trnT-GGU)
(AATA)3	12	31036	LSC	IGS(trnT-GGU-psbD)
(T)10	10	34013	LSC	IGS(psbC-trnS-UGA)
(AATT)3	12	35206	LSC	IGS(trnG-GCC-trnfM-CAU)
(A)12	12	43068	LSC	Intron2(ycf3)
(A)12	12	43333	LSC	IGS(ycf3-trnS-GGA)
(AT)6	12	45635	LSC	IGS(trnT-UGU-trnL-UAA)
(TA)5	10	46499	LSC	IGS(trnL-UAA-trnF-GAA)
(T)10	10	47145	LSC	IGS(trnF-GAA-ndhJ)
(T)11	11	49380	LSC	IGS(ndhC-trnV-UAC)
(T)10	10	52476	LSC	CDS(atpB)
(TTAT)3	12	55018	LSC	IGS(rbcL-accD)
(A)10	10	60735	LSC	IGS(petL-psbJ)
(T)10	10	63587	LSC	IGS(petL-petG)
(ATA)4	12	64259	LSC	IGS(trnP-UGG-psaJ)
(T)10	10	64794	LSC	IGS(psaJ-rpl33)
(A)10	10	64837	LSC	IGS(psaJ-rpl33)
(A)11	11	65946	LSC	IGS(rps18-rpl20)
(T)10	10	81274	Irb	IGS(rps19-rpl2)
(TATG)3	12	83202	Irb	IGS(rpl23-trnI-CAU)
(TTG)4	12	108508	SSC	CDS(ndhF)
(T)15	15	108926	SSC	IGS(ndhF-rpl32)
(AGGA)3	12	108990	SSC	IGS(ndhF-rpl32)
(A)12	12	112916	SSC	IGS(ndhD-psaC)
(T)11	11	119819	SSC	CDS(ycf1)
(T)11	11	121301	SSC	CDS(ycf1)
(T)10	10	121373	SSC	CDS(ycf1)
(T)11	11	121542	SSC	CDS(ycf1)
(T)11	11	123042	SSC	CDS(ycf1)
(T)11	11	123345	SSC	CDS(ycf1)
(T)11	11	123426	SSC	CDS(ycf1)
(CATA)3	12	146745	Ira	IGS(trnI-CAU-rpl23)
(A)10	10	148675	Ira	IGS(rpl2-trnH-GUG)

## Sheet: G. tibetica
Table S3 List of simple sequence repeats in eight Gentiana chloroplast genomes.
SSR	Size	Start position	Location	Location
(A)11	11	4459	LSC	IGS(trnK-UUU-trnQ-UUG)
(T)10	10	6471	LSC	IGS(psbK-psbI)
(A)10	10	6698	LSC	IGS(psbI-trnS-GCU)
(A)12	12	6962	LSC	IGS(trnS-GCU-trnG-UCC)
(A)10	10	17021	LSC	CDS(rpoC2)
(T)11	11	19237	LSC	CDS(rpoC1)
(TTTAAG)3	18	20910	LSC	Intron(rpoC1)
(A)11	11	26519	LSC	IGS(trnC-GCA-petN)
(TAAA)3	12	28293	LSC	IGS(petN-psbM)
(T)13	13	28915	LSC	IGS(psbM-trnD-GUC)
(TA)5	10	30055	LSC	IGS(trnE-UCC-trnT-GGU)
(AATA)3	12	30990	LSC	IGS(trnT-GGU-psbD)
(T)12	12	33967	LSC	IGS(psbC-trnS-UGA)
(AT)5	10	34880	LSC	IGS(psbZ-trnG-GCC)
(AATT)3	12	35211	LSC	IGS(trnG-GCC-trnfM-CAU)
(A)10	10	43073	LSC	Intron2(ycf3)
(A)10	10	45333	LSC	IGS(trnT-UGU-trnL-UAA)
(AT)6	12	45637	LSC	IGS(trnT-UGU-trnL-UAA)
(TA)5	10	46502	LSC	IGS(trnL-UAA-trnF-GAA)
(T)10	10	52414	LSC	CDS(atpB)
(TTAT)3	12	54963	LSC	IGS(accD-psaI)
(ATA)4	12	64241	LSC	IGS(trnP-UGG-psaJ)
(A)11	11	65945	LSC	IGS(rps18-rpl20)
(A)10	10	75307	LSC	IGS(petD-rpoA)
(T)10	10	81283	Irb	IGS(rps19-rpl2)
(TATG)3	12	83211	Irb	IGS(rpl23-trnI-CAU)
(A)10	10	93647	Irb	IGS(ndhB-rps7)
(TTG)4	12	108505	SSC	CDS(ndhF)
(T)11	11	108922	SSC	IGS(ndhF-rpl32)
(AGGA)3	12	108982	SSC	IGS(ndhF-rpl32)
(A)10	10	109713	SSC	IGS(rpl32-trnL-UAG)
(A)11	11	112910	SSC	IGS(ndhD-psaC)
(T)11	11	119802	SSC	CDS(ycf1)
(T)11	11	121284	SSC	CDS(ycf1)
(T)10	10	121356	SSC	CDS(ycf1)
(T)11	11	121525	SSC	CDS(ycf1)
(T)10	10	123016	SSC	CDS(ycf1)
(T)11	11	123400	SSC	CDS(ycf1)
(T)10	10	136273	Ira	IGS(rps7-ndhB)
(CATA)3	12	146707	Ira	IGS(trnI-CAU-rpl23)
(A)10	10	148637	Ira	IGS(rpl2-trnH-GUG)
