# Supplementary material for: Comparative Chloroplast Genome Analyses of Species in Gentiana section Cruciata (Gentianaceae) and the Development of Authentication Markers
Source: Int J Mol Sci. 2018 Jul 5;19(7):1962. doi: 10.3390/ijms19071962 (PMC6073106; doi:10.3390/ijms19071962)
Supplement: Supplementary file 1 [file ijms-19-01962-s001.zip › Supplementary Materials/Table S4.xlsx]

## Sheet: Sheet2
Table S4 dN/dS ratio between pairwise of species protein coding sequences of chloroplast genome in eight Gentiana species.
		Gc_Gt				Gc_Gr				Gc_Gsi				Gc_Go				Gc_Gst				Gc_Gd				Gc_Gm				Gt_Gr				Gt_Gsi				Gt_Go				Gt_Gst				Gt_Gd
	dN	dS	dN/dS		dN	dS	dN/dS		dN	dS	dN/dS		dN	dS	dN/dS		dN	dS	dN/dS		dN	dS	dN/dS		dN	dS	dN/dS		dN	dS	dN/dS		dN	dS	dN/dS		dN	dS	dN/dS		dN	dS	dN/dS		dN	dS	dN/dS		dN
accD_CDS	0	0	/		0.0009±0.0009	0	/		0.0009±0.0009	0	/		0.0009±0.0009	0	/		0.0009±0.0009	0	/		0.0009±0.0009	0	/		0.0121±0.0033	0.0114±0.0065	1.0575		0.0009±0.0009	0	/		0.0009±0.0009	0	/		0.0009±0.0009	0	/		0.0009±0.0009	0	/		0.0009±0.0009	0	/		0.0121±0.0033
atpA_CDS	0	0	/		0	0.0056±0.0039	0		0	0.0084±0.0048	0		0	0.0084±0.0048	0		0	0.0056±0.0039	0		0	0.0056±0.0039	0		0	0.0084±0.0048	0		0	0.0056±0.0039	0		0	0.0084±0.0048	0		0	0.0084±0.0048	0		0	0.0056±0.0039	0		0	0.0056±0.0039	0		0
atpB_CDS	0	0	/		0.0009±0.0009	0.0052±0.0037	0.1736		0.0009±0.0009	0.0078±0.0045	0.1155		0.0009±0.0009	0.0078±0.0045	0.1155		0.0009±0.0009	0.0052±0.0037	0.1736		0.0009±0.0009	0.0052±0.0037	0.1736		0.0009±0.0009	0.0078±0.0045	0.1155		0.0009±0.0009	0.0052±0.0037	0.1736		0.0009±0.0009	0.0078±0.0045	0.1155		0.0009±0.0009	0.0078±0.0045	0.1155		0.0009±0.0009	0.0052±0.0037	0.1736		0.0009±0.0009	0.0052±0.0037	0.1736		0.0009±0.0009
atpE_CDS	0	0	/		0	0	/		0	0	/		0	0	/		0	0	/		0	0	/		0	0	/		0	0	/		0	0	/		0	0	/		0	0	/		0	0	/		0
atpF_CDS	0	0	/		0	0	/		0	0.0067±0.0067	0		0	0.0067±0.0067	0		0	0	/		0	0.0067±0.0067	0		0	0.0067±0.0067	0		0	0	/		0	0.0067±0.0067	0		0	0.0067±0.0067	0		0	0	/		0	0.0067±0.0067	0		0
atpH_CDS	0	0	/		0	0	/		0	0	/		0	0	/		0	0	/		0	0	/		0	0	/		0	0	/		0	0	/		0	0	/		0	0	/		0	0	/		0
atpI_CDS	0	0	/		0.0018±0.0018	0	/		0.0018±0.0018	0	/		0.0018±0.0018	0	/		0.0018±0.0018	0	/		0.0018±0.0018	0	/		0.0018±0.0018	0	/		0.0018±0.0018	0	/		0.0018±0.0018	0	/		0.0018±0.0018	0	/		0.0018±0.0018	0	/		0.0018±0.0018	0	/		0.0018±0.0018
ccsA_CDS	0	0	/		0.0041±0.0024	0.0042±0.0042	0.9778		0.0041±0.0024	0.0084±0.0059	0.4867		0.0041±0.0024	0.0084±0.0059	0.4867		0.0041±0.0024	0.0042±0.0042	0.9778		0.0041±0.0023	0.0126±0.0073	0.3221		0.0041±0.0024	0.0084±0.0059	0.4867		0.0041±0.0024	0.0042±0.0042	0.9778		0.0041±0.0024	0.0084±0.0059	0.4867		0.0041±0.0024	0.0084±0.0059	0.4867		0.0041±0.0024	0.0042±0.0042	0.9778		0.0041±0.0023	0.0126±0.0073	0.3221		0.0041±0.0024
cemA_CDS	0	0	/		0.0020±0.0020	0.0055±0.0055	0.3653		0	0	/		0	0	/		0.0020±0.0020	0.0055±0.0055	0.3653		0	0	/		0	0	/		0.0020±0.0020	0.0055±0.0055	0.3653		0	0	/		0	0	/		0.0020±0.0020	0.0055±0.0055	0.3653		0	0	/		0
clpP_CDS	0	0	/		0.0059±0.0037	0.0102±0.0083	0.576		0.0059±0.0037	0.0102±0.0083	0.576		0.0059±0.0037	0.0102±0.0083	0.576		0.0059±0.0037	0.0102±0.0083	0.576		0.0059±0.0037	0.0102±0.0083	0.576		0	0.0068±0.0068	0		0.0059±0.0037	0.0102±0.0083	0.576		0.0059±0.0037	0.0102±0.0083	0.576		0.0059±0.0037	0.0102±0.0083	0.576		0.0059±0.0037	0.0102±0.0083	0.576		0.0059±0.0037	0.0102±0.0083	0.576		0
matK_CDS	0.0009±0.0009	0	/		0.0026±0.0015	0.0026±0.0026	0.9953		0.0043±0.0019	0.0106±0.0053	0.41		0.0052±0.0021	0.0106±0.0053	0.492		0.0035±0.0017	0.0026±0.0026	1.328		0.0044±0.0020	0.0053±0.0037	0.8288		0.0043±0.0019	0.0106±0.0053	0.41		0.0035±0.0017	0.0026±0.0026	1.3279		0.0052±0.0021	0.0106±0.0053	0.4924		0.0061±0.0023	0.0106±0.0053	0.5744		0.0044±0.0019	0.0026±0.0026	1.661		0.0052±0.0021	0.0053±0.0037	0.9954		0.0052±0.0021
ndhA_CDS	0	0	/		0	0.0071±0.0050	0		0	0.0071±0.0050	0		0	0.0071±0.0050	0		0	0.0071±0.0050	0		0	0.0071±0.0050	0		0	0.0106±0.0062	0		0	0.0071±0.0050	0		0	0.0071±0.0050	0		0	0.0071±0.0050	0		0	0.0071±0.0050	0		0	0.0071±0.0050	0		0
ndhB_CDS	0	0	/		0.0009±0.0009	0	/		0.0009±0.0009	0	/		0.0009±0.0009	0	/		0.0009±0.0009	0	/		0.0009±0.0009	0	/		0.0009±0.0009	0	/		0.0009±0.0009	0	/		0.0009±0.0009	0	/		0.0009±0.0009	0	/		0.0009±0.0009	0	/		0.0009±0.0009	0	/		0.0009±0.0009
ndhC_CDS	0	0	/		0	0	/		0	0	/		0	0	/		0	0	/		0	0	/		0	0	/		0	0	/		0	0	/		0	0	/		0	0	/		0	0	/		0
ndhD_CDS	0	0	/		0.0009±0.0009	0.0009±0.0009	0.1726		0.0018±0.0012	0.0076±0.0044	0.2302		0.0018±0.0012	0.0127±0.0057	0.1376		0.0009±0.0009	0.0051±0.0036	0.1726		0.0018±0.0012	0.0076±0.0044	0.2302		0.0018±0.0012	0.0076±0.0044	0.2302		0.0009±0.0009	0.0051±0.0036	0.1726		0.0018±0.0012	0.0076±0.0044	0.2302		0.0018±0.0012	0.0127±0.0057	0.1376		0.0009±0.0009	0.0051±0.0036	0.1726		0.0018±0.0012	0.0076±0.0044	0.2302		0.0018±0.0012
ndhE_CDS	0	0	/		0	0	/		0	0	/		0	0	/		0	0	/		0	0	/		0	0	/		0	0	/		0	0	/		0	0	/		0	0	/		0	0	/		0
ndhF_CDS	0	0	/		0.0023±0.0012	0.0041±0.0029	0.5632		0.0035±0.0014	0.0042±0.0029	0.8445		0.0029±0.0013	0.0041±0.0029	0.7034		0.0017±0.0010	0.0041±0.0029	0.4222		0.0029±0.0013	0.0041±0.0029	0.7034		0.0029±0.0013	0.0041±0.0029	0.7034		0.0023±0.0012	0.0041±0.0029	0.5632		0.0035±0.0014	0.0041±0.0029	0.845		0.0029±0.0013	0.0041±0.0029	0.7034		0.0017±0.0010	0.0041±0.0029	0.4222		0.0029±0.0013	0.0041±0.0029	0.7034		0.0029±0.0013
ndhG_CDS	0	0	/		0	0.0082±0.0082	0		0	0.0082±0.0082	0		0	0	/		0	0.0082±0.0082	0		0	0	/		0.0025±0.0025	0	/		0	0.0082±0.0082	0		0	0.0082±0.0082	0		0	0	/		0	0.0082±0.0082	0		0	0	/		0.0025±0.0025
ndhH_CDS	0	0	/		0	0.0188±0.0084	0		0	0.0225±0.0092	0		0	0.0225±0.0092	0		0	0.0188±0.0084	0		0	0.0225±0.0092	0		0	0.0263±0.0100	0		0	0.0188±0.0084	0		0	0.0225±0.0092	0		0	0.0225±0.0092	0		0	0.0188±0.0084	0		0	0.0225±0.0092	0		0
ndhI_CDS	0	0	/		0.0026±0.0026	0.0278±0.0161	0.0922		0.0025±0.0025	0.0480±0.0217	0.053		0.0025±0.0025	0.0586±0.0242	0.0433		0.0026±0.0026	0.0278±0.0161	0.0922		0.0025±0.0025	0.0480±0.0217	0.053		0.0025±0.0025	0.0480±0.0217	0.053		0.0026±0.0026	0.0278±0.0161	0.0922		0.0025±0.0025	0.0480±0.0217	0.053		0.0025±0.0025	0.0586±0.0242	0.0433		0.0026±0.0026	0.0278±0.0161	0.0922		0.0025±0.0025	0.0480±0.0217	0.053		0.0025±0.0025
ndhJ_CDS	0	0	/		0	0.0081±0.0081	0		0	0	/		0	0	/		0	0.0081±0.0081	0		0	0	/		0	0	/		0	0.0081±0.0081	0		0	0	/		0	0	/		0	0.0081±0.0081	0		0	0	/		0
ndhK_CDS	0	0	/		0	0.0069±0.0069	0		0	0.0069±0.0069	0		0	0.0069±0.0069	0		0	0.0069±0.0069	0		0	0.0069±0.0069	0		0	0.0069±0.0069	0		0	0.0069±0.0069	0		0	0.0069±0.0069	0		0	0.0069±0.0069	0		0	0.0069±0.0069	0		0	0.0069±0.0069	0		0
petA_CDS	0	0	/		0	0.0124±0.0072	0		0	0.0165±0.0083	0		0	0.0165±0.0083	0		0	0.0124±0.0072	0		0	0.0165±0.0083	0		0	0.0165±0.0083	0		0	0.0124±0.0072	0		0	0.0165±0.0083	0		0	0.0165±0.0083	0		0	0.0124±0.0072	0		0	0.0165±0.0083	0		0
petB_CDS	0	0	/		0	0.0076±0.0076	0		0	0.0236±0.0137	0		0	0.0236±0.0137	0		0	0.0076±0.0076	0		0	0.0318±0.0161	0		0	0.0236±0.0137	0		0	0.0076±0.0076	0		0	0.0236±0.0137	0		0	0.0236±0.0137	0		0	0.0076±0.0076	0		0	0.0318±0.0161	0		0
petD_CDS	0	0	/		0	0	/		0	0	/		0	0	/		0	0	/		0	0	/		0	0	/		0	0	/		0	0	/		0	0	/		0	0	/		0	0	/		0
petG_CDS	0	0	/		0	0	/		0	0	/		0	0	/		0	0	/		0	0	/		0	0	/		0	0	/		0	0	/		0	0	/		0	0	/		0	0	/		0
petL_CDS	0	0	/		0	0	/		0	0	/		0	0	/		0	0	/		0	0	/		0	0	/		0	0	/		0	0	/		0	0	/		0	0	/		0	0	/		0
petN_CDS	0	0	/		0.0160±0.0160	0	/		0.0160±0.0160	0	/		0.0160±0.0160	0	/		0.0160±0.0160	0	/		0.0160±0.0160	0	/		0.0160±0.0160	0	/		0.0160±0.0160	0	/		0.0160±0.0160	0	/		0.0160±0.0160	0	/		0.0160±0.0160	0	/		0.0160±0.0160	0	/		0.0160±0.0160
psaA_CDS	0	0	/		0	0.0070±0.0035	0		0	0.0071±0.0035	0		0	0.0071±0.0035	0		0	0.0070±0.0035	0		0	0.0071±0.0035	0		0	0.0071±0.0035	0		0	0.0070±0.0035	0		0	0.0071±0.0035	0		0	0.0071±0.0035	0		0	0.0070±0.0035	0		0	0.0071±0.0035	0		0
psaB_CDS	0	0	/		0	0.0057±0.0033	0		0	0.0057±0.0033	0		0	0.0076±0.0038	0		0	0.0057±0.0033	0		0	0.0057±0.0033	0		0	0.0057±0.0033	0		0	0.0057±0.0033	0		0	0.0057±0.0033	0		0	0.0076±0.0038	0		0	0.0057±0.0033	0		0	0.0057±0.0033	0		0
psaC_CDS	0	0	/		0	0	/		0	0.0207±0.0208	0		0	0.0207±0.0208	0		0	0	/		0	0.0208±0.0210	0		0	0.0207±0.0208	0		0	0	/		0	0.0207±0.0208	0		0	0.0207±0.0208	0		0	0	/		0	0.0208±0.0210	0		0
psaI_CDS	0	0	/		0	0	/		0	0.0425±0.0428	0		0	0.0425±0.0428	0		0	0	/		0	0.0425±0.0428	0		0	0.0425±0.0428	0		0	0	/		0	0.0425±0.0428	0		0	0.0425±0.0428	0		0	0	/		0	0.0425±0.0428	0		0
psaJ_CDS	0	0	/		0	0	/		0	0	/		0	0	/		0	0	/		0	0	/		0	0	/		0	0	/		0	0	/		0	0	/		0	0	/		0	0	/		0
psbA_CDS	0	0	/		0	0	/		0	0	/		0	0	/		0	0	/		0	0	/		0	0	/		0	0	/		0	0	/		0	0	/		0	0	/		0	0	/		0
psbB_CDS	0	0	/		0	0.0058±0.0041	0		0	0.0058±0.0041	0		0	0.0058±0.0041	0		0	0.0058±0.0041	0		0	0.0058±0.0041	0		0	0.0058±0.0041	0		0	0.0058±0.0041	0		0	0.0058±0.0041	0		0	0.0058±0.0041	0		0	0.0058±0.0041	0		0	0.0058±0.0041	0		0
psbC_CDS	0	0	/		0	0.0025±0.0025	0		0	0	/		0	0	/		0	0.0025±0.0025	0		0	0	/		0	0.0025±0.0025	0		0	0.0025±0.0025	0		0	0	/		0	0	/		0	0.0025±0.0025	0		0	0	/		0
psbD_CDS	0	0	/		0	0.0037±0.0037	0		0	0.0037±0.0037	0		0	0.0037±0.0037	0		0	0.0037±0.0037	0		0	0.0037±0.0037	0		0	0.0037±0.0037	0		0	0.0037±0.0037	0		0	0.0037±0.0037	0		0	0.0037±0.0037	0		0	0.0037±0.0037	0		0	0.0037±0.0037	0		0
psbE_CDS	0.0056±0.0056	0	/		0.0056±0.0056	0	/		0.0056±0.0056	0	/		0.0056±0.0056	0	/		0.0056±0.0056	0	/		0.0056±0.0056	0	/		0.0056±0.0056	0	/		0	0	/		0	0	/		0	0	/		0	0	/		0	0	/		0
psbF_CDS	0	0	/		0	0	/		0	0	/		0	0	/		0	0	/		0	0	/		0	0	/		0	0	/		0	0	/		0	0	/		0	0	/		0	0	/		0
psbH_CDS	0	0	/		0.0064±0.0064	0.0195±0.0196	0.3271		0.0064±0.0064	0	/		0.0064±0.0064	0	/		0.0064±0.0064	0.0195±0.0196	0.3271		0.0064±0.0064	0	/		0.0064±0.0064	0	/		0.0064±0.0064	0.0195±0.0196	0.3271		0.0064±0.0064	0	/		0.0064±0.0064	0	/		0.0064±0.0064	0.0195±0.0196	0.3271		0.0064±0.0064	0	/		0.0064±0.0064
psbI_CDS	0	0	/		0	0	/		0	0	/		0	0	/		0	0	/		0	0	/		0	0	/		0	0	/		0	0	/		0	0	/		0	0	/		0	0	/		0
psbJ_CDS	0	0	/		0	0	/		0	0	/		0	0	/		0	0	/		0	0	/		0	0	/		0	0	/		0	0	/		0	0	/		0	0	/		0	0	/		0
psbK_CDS	0	0	/		0	0	/		0	0	/		0	0	/		0	0	/		0	0	/		0	0	/		0	0	/		0	0	/		0	0	/		0	0	/		0	0	/		0
psbL_CDS	0	0	/		0	0	/		0	0	/		0	0	/		0	0	/		0	0	/		0	0	/		0	0	/		0	0	/		0	0	/		0	0	/		0	0	/		0
psbM_CDS	0	0	/		0	0	/		0	0	/		0	0	/		0	0	/		0	0	/		0	0	/		0	0	/		0	0	/		0	0	/		0	0	/		0	0	/		0
psbN_CDS	0	0	/		0	0	/		0	0	/		0	0	/		0	0	/		0	0	/		0	0	/		0	0	/		0	0	/		0	0	/		0	0	/		0	0	/		0
psbT_CDS	0	0	/		0	0	/		0	0	/		0	0	/		0	0	/		0	0	/		0	0	/		0	0	/		0	0	/		0	0	/		0	0	/		0	0	/		0
psbZ_CDS	0	0	/		0	0	/		0	0	/		0	0	/		0	0	/		0	0	/		0	0	/		0	0	/		0	0	/		0	0	/		0	0	/		0	0	/		0
rbcL_CDS	0	0	/		0.0018±0.0013	0.0029±0.0029	0.6284		0.0027±0.0016	0.0058±0.0041	0.4693		0.0027±0.0016	0.0058±0.0041	0.4693		0.0018±0.0013	0.0029±0.0029	0.6284		0.0027±0.0016	0.0058±0.0041	0.4693		0.0027±0.0016	0.0058±0.0041	0.4693		0.0018±0.0013	0.0029±0.0029	0.6284		0.0027±0.0016	0.0058±0.0041	0.4693		0.0027±0.0016	0.0058±0.0041	0.4693		0.0018±0.0013	0.0029±0.0029	0.6284		0.0027±0.0016	0.0058±0.0041	0.4693		0.0027±0.0016
rpl2_CDS	0	0	/		0	0	/		0	0	/		0	0	/		0	0	/		0	0	/		0	0	/		0	0	/		0	0	/		0	0	/		0	0	/		0	0	/		0
rpl14_CDS	0	0	/		0	0	/		0	0	/		0	0	/		0	0	/		0	0	/		0	0	/		0	0	/		0	0	/		0	0	/		0	0	/		0	0	/		0
rpl16_CDS	0	0	/		0	0	/		0.0030±0.0030	0	/		0.0030±0.0030	0	/		0	0	/		0.0030±0.0030	0	/		0.0030±0.0030	0	/		0	0	/		0.0030±0.0030	0	/		0.0030±0.0030	0	/		0	0	/		0.0030±0.0030	0	/		0.0030±0.0030
rpl20_CDS	0	0	/		0	0	/		0	0	/		0	0	/		0	0	/		0	0	/		0	0	/		0	0	/		0	0	/		0	0	/		0	0	/		0	0	/		0
rpl22_CDS	0	0	/		0	0.0256±0.0182	0		0.0025±0.0025	0.0126±0.0126	0.1952		0.0025±0.0025	0.0126±0.0126	0.1952		0	0.0256±0.0182	0		0	0.0125±0.0125	0		0.0025±0.0025	0.0126±0.0126	0.1952		0	0.0256±0.0182	0		0.0025±0.0025	0.0126±0.0126	0.1952		0.0025±0.0025	0.0126±0.0126	0.1952		0	0.0256±0.0182	0		0	0.0125±0.0125	0		0.0025±0.0025
rpl23_CDS	0	0	/		0	0.0182±0.0183	0		0	0.0182±0.0183	0		0	0.0182±0.0183	0		0	0.0182±0.0183	0		0	0.0182±0.0183	0		0	0.0182±0.0183	0		0	0.0182±0.0183	0		0	0.0182±0.0183	0		0	0.0182±0.0183	0		0	0.0182±0.0183	0		0	0.0182±0.0183	0		0
rpl32_CDS	0	0	/		0.0074±0.0074	0.0389±0.0391	0.1906		0.0074±0.0074	0.0389±0.0391	0.1906		0.0074±0.0074	0.0389±0.0391	0.1906		0.0074±0.0074	0.0389±0.0391	0.1906		0.0074±0.0074	0.0389±0.0391	0.1906		0.0074±0.0074	0.0389±0.0391	0.1906		0.0074±0.0074	0.0389±0.0391	0.1906		0.0074±0.0074	0.0389±0.0391	0.1906		0.0074±0.0074	0.0389±0.0391	0.1906		0.0074±0.0074	0.0389±0.0391	0.1906		0.0074±0.0074	0.0389±0.0391	0.1906		0.0074±0.0074
rpl33_CDS	0	0	/		0.0071±0.0071	0	/		0.0071±0.0071	0	/		0.0071±0.0071	0	/		0.0071±0.0071	0	/		0.0071±0.0071	0	/		0.0071±0.0071	0	/		0.0071±0.0071	0	/		0.0071±0.0071	0	/		0.0071±0.0071	0	/		0.0071±0.0071	0	/		0.0071±0.0071	0	/		0.0071±0.0071
rpl36_CDS	0	0	/		0	0	/		0	0	/		0	0	/		0	0	/		0	0	/		0	0	/		0	0	/		0	0	/		0	0	/		0	0	/		0	0	/		0
rpoA_CDS	0	0	/		0	0	/		0	0.0049±0.0049	0		0	0	/		0	0	/		0	0	/		0	0	/		0	0	/		0	0.0049±0.0049	0		0	0	/		0	0	/		0	0	/		0
rpoB_CDS	0	0	/		0.0004±0.0004	0.0013±0.0013	0.3087		0.0004±0.0004	0.0013±0.0013	0.3087		0.0004±0.0004	0.0013±0.0013	0.3087		0.0004±0.0004	0.0013±0.0013	0.3087		0.0004±0.0004	0.0040±0.0023	0.1028		0.0004±0.0004	0.0013±0.0013	0.3087		0.0008±0.0006	0.0013±0.0013	0.6176		0.0008±0.0006	0.0013±0.0013	0.6176		0.0008±0.0006	0.0013±0.0013	0.6176		0.0008±0.0006	0.0013±0.0013	0.6176		0.0008±0.0006	0.0040±0.0023	0.2056		0.0008±0.0006
rpoC1_CDS	0	0	/		0	0.0044±0.0031	0		0	0.0044±0.0031	0		0	0.0044±0.0031	0		0	0.0044±0.0031	0		0	0.0044±0.0031	0		0	0.0044±0.0031	0		0	0.0044±0.0031	0		0	0.0044±0.0031	0		0	0.0044±0.0031	0		0	0.0044±0.0031	0		0	0.0044±0.0031	0		0
rpoC2_CDS	0	0	/		0.0013±0.0006	0.0050±0.0022	0.2604		0.0016±0.0007	0.0080±0.0028	0.203		0.0016±0.0007	0.0080±0.0028	0.203		0.0016±0.0007	0.0050±0.0022	0.3254		0.0013±0.0006	0.0090±0.0030	0.144		0.0016±0.0007	0.0080±0.0028	0.203		0.0013±0.0006	0.0050±0.0022	0.2604		0.0016±0.0007	0.0080±0.0028	0.203		0.0016±0.0007	0.0080±0.0028	0.203		0.0016±0.0007	0.0050±0.0022	0.3254		0.0013±0.0006	0.0090±0.0030	0.144		0.0016±0.0007
rps2_CDS	0	0	/		0	0.0064±0.0064	0		0	0.0064±0.0064	0		0	0.0064±0.0064	0		0	0.0064±0.0064	0		0	0.0064±0.0064	0		0	0.0064±0.0064	0		0	0.0064±0.0064	0		0	0.0064±0.0064	0		0	0.0064±0.0064	0		0	0.0064±0.0064	0		0	0.0064±0.0064	0		0
rps3_CDS	0	0	/		0	0.0068±0.0068	0		0	0.0068±0.0068	0		0	0.0068±0.0068	0		0	0.0068±0.0068	0		0	0.0068±0.0068	0		0	0.0068±0.0068	0		0	0.0068±0.0068	0		0	0.0068±0.0068	0		0	0.0068±0.0068	0		0	0.0068±0.0068	0		0	0.0068±0.0068	0		0
rps4_CDS	0	0	/		0	0.0141±0.0100	0		0	0.0070±0.0070	0		0	0.0070±0.0070	0		0	0.0141±0.0100	0		0	0.0070±0.0070	0		0	0.0070±0.0070	0		0	0.0141±0.0100	0		0	0.0070±0.0070	0		0	0.0070±0.0070	0		0	0.0141±0.0100	0		0	0.0070±0.0070	0		0
rps7_CDS	0	0	/		0	0	/		0	0.0102±0.0103	0		0	0	/		0	0	/		0	0	/		0	0	/		0	0	/		0	0.0102±0.0103	0		0	0	/		0	0	/		0	0	/		0
rps8_CDS	0	0	/		0	0	/		0	0.0101±0.0101	0		0	0	/		0	0	/		0	0	/		0	0	/		0	0	/		0	0.0101±0.0101	0		0	0	/		0	0	/		0	0	/		0
rps11_CDS	0	0	/		0.0106±0.0058	0.0279±0.0172	0.3796		0.0106±0.0058	0.0279±0.0172	0.3796		0.0106±0.0058	0.0390±0.0205	0.2717		0.0106±0.0058	0.0279±0.0172	0.3796		0.0106±0.0058	0.0279±0.0172	0.3796		0	0.0102±0.0102	0		0.0106±0.0058	0.0279±0.0172	0.3796		0.0106±0.0058	0.0279±0.0172	0.3796		0.0106±0.0058	0.0390±0.0205	0.2717		0.0106±0.0058	0.0279±0.0172	0.3796		0.0106±0.0058	0.0279±0.0172	0.3796		0
rps12_CDS	0	0	/		0	0	/		0	0	/		0	0	/		0	0	/		0	0	/		0	0	/		0	0	/		0	0	/		0	0	/		0	0	/		0	0	/		0
rps14_CDS	0	0	/		0	0.0259±0.0185	0		0	0.0259±0.0185	0		0	0.0259±0.0185	0		0	0.0259±0.0185	0		0	0.0259±0.0185	0		0	0.0259±0.0185	0		0	0.0259±0.0185	0		0	0.0259±0.0185	0		0	0.0259±0.0185	0		0	0.0259±0.0185	0		0	0.0259±0.0185	0		0
rps15_CDS	0	0	/		0	0	/		0.0050±0.0050	0.0163±0.0163	0.3101		0.0050±0.0050	0.0163±0.0163	0.3101		0	0	/		0.0050±0.0050	0.0163±0.0163	0.3101		0.0050±0.0050	0.0163±0.0163	0.3101		0	0	/		0.0050±0.0050	0.0163±0.0163	0.3101		0.0050±0.0050	0.0163±0.0163	0.3101		0	0	/		0.0050±0.0050	0.0163±0.0163	0.3101		0.0050±0.0050
rps18_CDS	0	0	/		0	0	/		0	0	/		0	0	/		0	0	/		0	0	/		0	0	/		0	0	/		0	0	/		0	0	/		0	0	/		0	0	/		0
rps19_CDS	0	0	/		0	0	/		0	0	/		0	0	/		0	0	/		0	0	/		0	0	/		0	0	/		0	0	/		0	0	/		0	0	/		0	0	/		0
ycf1_CDS	0	0	/		0.0112±0.0019	0.0079±0.0030	1.4136		0.0085±0.0017	0.0068±0.0028	1.2568		0.0079±0.0016	0.0068±0.0028	1.1587		0.0109±0.0019	0.0079±0.0030	1.369		0.0085±0.0017	0.0068±0.0028	1.2554		0.0082±0.0016	0.0068±0.0028	1.2072		0.0112±0.0019	0.0079±0.0030	1.4136		0.0085±0.0017	0.0068±0.0028	1.2568		0.0079±0.0016	0.0068±0.0028	1.1587		0.0109±0.0019	0.0079±0.0030	1.369		0.0085±0.0017	0.0068±0.0028	1.2554		0.0082±0.0016
ycf2_CDS	0	0	/		0.0008±0.0004	0.0012±0.0008	0.6802		0.0006±0.0003	0.0017±0.0010	0.34		0.0006±0.0003	0.0017±0.0010	0.34		0.0008±0.0004	0.0012±0.0008	0.6802		0.0006±0.0003	0.0017±0.0010	0.34		0.0006±0.0003	0.0017±0.0010	0.34		0.0008±0.0004	0.0012±0.0008	0.6802		0.0006±0.0003	0.0017±0.0010	0.34		0.0006±0.0003	0.0017±0.0010	0.34		0.0008±0.0004	0.0012±0.0008	0.6802		0.0006±0.0003	0.0017±0.0010	0.34		0.0006±0.0003
ycf3_CDS	0	0	/		0	0	/		0	0.0086±0.0086	0		0	0.0086±0.0086	0		0	0	/		0	0.0086±0.0086	0		0	0.0086±0.0086	0		0	0	/		0	0.0086±0.0086	0		0	0.0086±0.0086	0		0	0	/		0	0.0086±0.0086	0		0
ycf4_CDS	0	0	/		0	0.0073±0.0073	0		0	0.0073±0.0073	0		0	0.0073±0.0073	0		0	0.0073±0.0073	0		0	0.0073±0.0073	0		0	0.0073±0.0073	0		0	0.0073±0.0073	0		0	0.0073±0.0073	0		0	0.0073±0.0073	0		0	0.0073±0.0073	0		0	0.0073±0.0073	0		0
ycf15_CDS	0	0.0293±0.0209	0		0	0	/		0	0	/		0	0	/		0	0	/		0	0	/		0	0	/		0	0.0293±0.0209	0		0	0.0293±0.0209	0		0	0.0293±0.0209	0		0	0.0293±0.0209	0		0	0.0293±0.0209	0		0
Gd: G. dahurica; Go: G. officinalis; Gm: G. macrophylla; Gsi: G. siphonantha; Gst: G. straminea; Gr: G. robusta; Gc: G. crassicaulis; Gt: G tibetica
[truncated: 48 more columns]
