# Supplementary material for: Comparative Chloroplast Genome Analyses of Species in Gentiana section Cruciata (Gentianaceae) and the Development of Authentication Markers
Source: Int J Mol Sci. 2018 Jul 5;19(7):1962. doi: 10.3390/ijms19071962 (PMC6073106; doi:10.3390/ijms19071962)
Supplement: Supplementary file 1 [file ijms-19-01962-s001.zip › Supplementary Materials/Table S5.xlsx]

## Sheet: Sheet1
Table S5 The primer pairs for 16 molecular markers derived from InDel regions of eight chloroplast genomes in Gentiana sect. Cruciata.
Marker	primers	Sequence
QJcpm1	ndhC-trnV(F)	CGAACTCCTATGAACGTGGA
	ndhC-trnV(R)	CGAGAAGGTCTACGGTTCGA
QJcpm2	cemA-petA(F)	TCGAGTATCTCCGTCACTTGT
	cemA-petA(R)	GCCTGCGGAACCTCAATATC
QJcpm3	rbcL-accD(F)	GTATTGCTTTCTACCCATCCTGT
	rbcL-accD(R)	TATTTAGCCCACACCTGCGT
QJcpm4	rpl33-rps18(F)	GGCCAAGGGTAAAGATGTTCG
	rpl33-rps18(R)	CCCCGATTGAATAGGAGGCA
QJcpm5	atpB-rbcL(F)	ACCAGAACCGGAAGTAGTCG
	atpB-rbcL(R)	CCATGCGACTTGACTTGCTA
QJcpm6	ycf1_1(F)	TCCGGATTGTGATTGCCCTA
	ycf1_1(R)	GGCATAGATCTAAACTCCGGC
QJcpm7	ycf1_2(F)	CGAATTTGCCACCGCCTATT
	ycf1_2(R)	ACTGATGGTACTCGTAACGACT
QJcpm8	rps8-rpl14(F)	GCTTTTCGCGCTGTTTTCTC
	rps8-rpl14(R)	TTGCTGTGATCAAAGACGCA
QJcpm9	rps16-trnQ(F)	ACGGACGATTCATTCACACA
	rps16-trnQ(R)	AAATCTAAATGGGGCGTGGC
QJcpm10	trnT-psbD(F)	TCTGACCCGTTGAATCGTGA
	trnT-psbD(R)	ATCGACCCTCAGACCTAAGC
QJcpm11	rrn5-trnA(F)	TTTTGGTCCGCTATCCCCAT
	rrn5-trnA(R)	CTGGTGTCCTAGGCGTAGAG
QJcpm12	psbM-trnD(F)	GATGACAAGCCCCTCTCCTT
	psbM-trnD(R)	GAGCACCGCCCTGTCAAG
QJcpm13	trnS-trnG(F)	CACTCAGCCATCTCTCCCAA
	trnS-trnG(R)	CGAACGGGGAAATTGGACAG
QJcpm14	trnS-psbZ(F)	TTCAAGACCGGGGCTATCAA
	trnS-psbZ(R)	CCAACCCATAATGATGTACCGG
QJcpm15	accD-psbI(F)	ATTATTGCTGAACCCGACGC
	accD-psbI(R)	TGCCGGAAATACTAAGCCTACT
QJcpm16	trnK-rps16(F)	GCCGAGTACTCTACCGTTGA
	trnK-rps16(R)	GGCTTTATCGACCCAACACA
