# Supplementary material for: Comparative Chloroplast Genome Analyses of Species in Gentiana section Cruciata (Gentianaceae) and the Development of Authentication Markers
Source: Int J Mol Sci. 2018 Jul 5;19(7):1962. doi: 10.3390/ijms19071962 (PMC6073106; doi:10.3390/ijms19071962)
Supplement: Supplementary file 1 [file ijms-19-01962-s001.zip › Supplementary Materials/Table S6.xlsx]

## Sheet: Sheet1
Table S6 List of chloroplast genome sequences included in the phylogenetic analyses
No.	Family	Taxon	Accesion number
	Gentianaceae	Gentiana dahurica	MH261259
	Gentianaceae	Gentiana officinalis	MH261261
	Gentianaceae	Gentiana siphonantha	MH261260
	Gentianaceae	Gentiana crassicaulis	NC_027442
	Gentianaceae	Gentiana tibetica	NC_030319
	Gentianaceae	Gentiana macrophylla	KY856959
	Gentianaceae	Gentiana robusta	KT159969
	Gentianaceae	Gentiana straminea	KJ657732
	Gentianaceae	Gentiana lawrencei var. farreri	KX096882
	Gentianaceae	Swertia mussotii	NC_031155
	Rubiaceae	Coffea arabica	KY085909
	Rubiaceae	Coffea canephora	NC_030053
	Rubiaceae	Mitragyna speciosa	NC_034698
	Rubiaceae	Morinda officinalis	NC_028009
	Rubiaceae	Gynochthodes nanlingensis	NC_028614
	Apocynaceae	Asclepias nivea	NC_022431
	Apocynaceae	Asclepias syriaca	NC_022432
	Apocynaceae	Cynanchum auriculatum	NC_029460
	Apocynaceae	Cynanchum wilfordii	NC_029459
	Apocynaceae	Oncinotis tenuiloba	NC_025657
	Apocynaceae	Echites umbellatus	NC_025655
	Apocynaceae	Pentalinon luteum	NC_025658
	Apocynaceae	Nerium oleander	NC_025656
	Apocynaceae	Carissa macrocarpa	NC_033354
	Apocynaceae	Rhazya stricta	NC_024292
	Apocynaceae	Catharanthus roseus	NC_021423
	Outgroup	Arabidopsis thaliana	NC_000932
