# Supplementary material for: Comparative Chloroplast Genome Analyses of Species in Gentiana section Cruciata (Gentianaceae) and the Development of Authentication Markers
Source: Int J Mol Sci. 2018 Jul 5;19(7):1962. doi: 10.3390/ijms19071962 (PMC6073106; doi:10.3390/ijms19071962)
Supplement: Supplementary file 1 [file ijms-19-01962-s001.zip › Supplementary Materials/Table S7.xlsx]

## Sheet: Primers
Table S7 Primers and Sanger sequencing results for validation the junction of SC/IR boundaries.
Primer	Sequence
LSC-IRb(F)	ACTCTTCTTGCTTTGTCAGGAG
LSC-IRb(R)	AGGAGTAAGCTGTGACACGT
IRb-SSC(F)	AGGCAGAATACCGTTACCCA
IRb-SSC(R)	TGGTCAGATAATCGTGCTTACA
SSC-IRa(F)	TGAATAAACTGGGTGGGTATGT
SSC-IRa(R)	AGGCAGAATACCGTTACCCA
IRa-LSC(F)	AGGTGGGGAATCTTGAGGTG
IRa-LSC(R)	ACTATGCGCGGGTTCAATTC

## Sheet: Sequencing results
Table S7 Primers and Sanger sequencing results for validation the junction of SC/IR boundaries.
Regions	Species	Sequence
LSC-IRb	G. dahurica	ACATATACCTCTAACATACTTTTTTTTGTTTTTTCCTTTGTTATCATAAAGTGACTCCTACTAATGAGTTATCATAAACATGTTTTAGTTAATCGTAATTTTCTCTTAACGACGAGATCTATTATCATTTTTTGTATGTCCTAAGAAATTTAAAGTAGGAGAAAATTCTCCTAATTTGTGTCCTACCATACGGTCTGTTATATAAATAGGCAGGTGCTCCTTTCCATTATGGATAGCAATGGTATGCCCGATCATTGTGGGGATAATGGTAGATCCCCGTGACCAGGTTACGATTATTTCTTTTTCTTCTTTTGTGTTAAGTTTATTCATTTTTTTTAATAAATGGTTGGCTACAAAAGGATTTTTTTTTACTGAACGTGTCACAG
	G. officinalis	ACATATACCTCTAACATACTTTTTTTTGTTTTTTCCTTTGTTATCATAAAGTGACTCCTACTAATGAGTTATCATAAACATGTTTTAGTTAATCGTAATTTTCTCTTAACGACGAGATCTATTATCATTTTTTGTATGTCCTAAGAAATTTAAAGTAGGAGAAAATTCTCCTAATTTGTGTCCTACCATACGGTCTGTTATATAAATAGGCAGGTGCTCCTTTCCATTATGGATAGCAATGGTATGCCCGATCATTGTGGGGATAATGGTAGATCCCCGTGACCAGGTTACGATTATTTCTTTTTCTTCTTTTGTGTTAAGTTTATTCATTTTTTTTAATAAATGGTTGGCTACAAAAGGATTTTTTTTTACTGAACGTGTCACAG
	G. siphonantha	ACATATACCTCTAACATACTTTTTTTTGTTTTTTCCTTTGTTATCATAAAGTGACTCCTACTAATGAGTTATCATAAACATGTTTTAGTTAATCGTAATTTTCTCTTAACGACGAGATCTATTATCATTTTTTGTATGTCCTAAGAAATTTAAAGTAGGAGAAAATTCTCCTAATTTGTGTCCTACCATACGGTCTGTTATATAAATAGGCAGGTGCTCCTTTCCATTATGGATAGCAATGGTATGCCCGATCATTGTGGGGATAATGGTAGATCCCCGTGACCAGGTTACGATTATTTCTTTTTCTTCTTTTGTGTTAAGTTTATTCATTTTTTTTAATAAATGGTTGGCTACAAAAGGATTTTTTTTTACTGAACGTGTCACAG
IRb-SSC	G. dahurica	CTGAACAACCTCAAAAACGGAAGAAGGGGTGGAAAGTGAGGAAGAAAGAGATCTAGGAATAGAAACAACTTCCGAAAAAAAGGGGACTAAACAAGCACAAAGGGGATCCACCGAAGAAGATCCTTCTTCTTCACTTTTTTCGAAATTAAATGAGAAGGGGGGTAAAAATGAAAAAAAGGAACAAAAAAATGGATACATAAGATAAATAGAAGAAAATATAAGAAGAAATGCGCCCCCCACCCACATATTTAATAGCCTCTCCTACAAAGAAACTGAAAAAACCAACCCTGTTCGTAATTCCATCAATTAGACGTCGATCAAAAAAATAAGTAAATTCACCTAATCTTCTTACTCCTCTAGTTAAGGTTGTTGTATAAAAAAAATCTATGTAAGCACGAT…
	G. officinalis	CTGAACAACCTCAAAAACGGAAGAAGGGGTGGAAAGTGAGGAAGAAAGAGATCTAGGAATAGAAACAACTTCCGAAAAAAAGGGGACTAAACAAGCACAAAAGGGATCCACCGAAGAAGATCCTTCTTCTTCACTTTTTTCGAAATTAAATGAGAAGGGGGGTAAAAATGAAAAAAAGGAACAAAAAAATGGATACATAAGATAAATAGAAGAAAATATAAGAAGAAATGCGCCCCCCACCCACATATTTAATAGCCTCTCCTACAAAGAAACTGAAAAAACCAACCCTGTTCGTAATTCCATCAATTAGACGTCGATCAAAAAAATAAGTAAATTCACCTAATCTTCTTACTCCTCTAGTTAAGGTTGTTGTATAAAAAAAATCTATGTAAGCACGAT…
	G. siphonantha	CTGAACAACCTCAAAAACGGAAGAAGGGGTGGAAAGTGAGGAAGAAAGAGATCTAGGAATAGAAACAACTTCCGAAAAAAAGGGGACTAAACAAGCACAAAAGGGATCCACCGAAGAAGATCCTTCTTCTTCACTTTTTTCGAAATTAAATGAGAAGGGGGGTAAAAATGAAAAAAAGGAACAAAAAAATGGATACATAAGATAAATAGAAGAAAATATAAGAAGAAATGCGCCCCCCACCCACATATTTAATAGCCTCTCCTACAAAGAAACTGAAAAAACCAACCCTGTTCGTAATTCCATCAATTAGACGTCGATCAAAAAAATAAGTAAATTCACCTAATCTTCTTACTCCTCTAGTTAAGGTTGTTGTATAAAAAAAATCTATGTAAGCACGAT…
SSC-IRa	G. dahurica	TTTTTATTCGTTTTACTTTTGGGTATGTCAAAGAAATGTTGTGCCATTTCATTTCGCACACTTCCTTCACTTCTTTTTTTTTTTATGTATCGAAATGGACGATTCCTTCTGTTATGATCAAAAAAAAAAGTCACAAGAAATTTTGAAAAATCTTCAACGGCAAGCCGAAAGAATATGTATCCATTTTTTTGTTCCTTTTTTTCATTTTTACCCCCCTTCTCATTTAATTTCAAAAAAAGGGAAAAAAAAGGATCTTCTTCGGGGGACCCCCTTTGGGCTTGTTTAGTCCCCTTTTTTTCGGAAGTTGTTTCTATTCCTAAATCTCTTTCTTCCCCACTTTCCCCCCCTTCTTCCGTTTTTGAGGTTTGTTTCATTTTATTAGGTTTATTATTAAAAAGG…
	G. officinalis	TTTTTCTTCGTTTTACTTTTGGGTATGTCAAAGAAATGTTGTGCCATTTCATTTCGCACACTTCCTTCACTTCTTTTTTTTTTTATGTATCGAAAGGGACGATTCCTTCTGTTATGATCGAAAAAAAAAGTCACAAGAAATTTTGAAAAATCTTCAACTGCAAGCCGAAAAAATATGTATCCATTTTTTTGTTCCTTTTTTTCATTTTTACCCCCCTTCTCATTTAATTTCAAAAAAAGTGAAAAAAAAGGATCTTCTTCGGGGGATCCCTTTTGGGCTGGTTTAGTCCCCTTTTTTTCGGAAGTTGTTTCTATTCCTAAATCTCTTTCTTCCCCACTTTCCCCCCCTTCTTCCGTTTTTGAGGTTGGTTTCATTTTATTAGGTTTATTAGTAAAAAGG…
	G. siphonantha	TTTTTATTCGTTTTACTTTTGGGTATGTCAAAGAAATGTTGTGCCATTTCATTTCGCACACTTCCTTCACTTCTTTTTTTTTTTATGTATCGAAAGGGACAATTCCTTCTGTTATGATCAAAAAAAAAAGTCACAAGAAATTTTGAAAAATCTTCAACGGCAAGCCAAAAAAATATGTATCCATTTTTTTGTTCCTTTTTTTCATTTTTACCCCCCTTCTCATTTAATTTCAAAAAAAGTGAAAAAAAAGGATCTTCTTCGGGGGACCCCTTTGGGGCTGGTTTAGCCCCCTTTTTTTCGGAAGTTGTTTCTATTCCTAGATCTCTTTCTTCCTCACTTTCCCCCCCTTCTTCCGTTTTTGAGGTTTGTTTCATTTTATTAGGTTTATTATTAAAAAGG…
IRb-LSC	G. dahurica	GCGTTGGCTAGGTAAGCGTCCTGTAGTAAGAGGAGTAGTTATGAACCCTGTAGACCACCCCCACGGGGGGGGTGAGGGGAGAGCCCCAATTGGTAGAAAAAAACCCACAACCCCTTGGGGTTATCCTGCACTTGGAAGAAGAAGTAGAAAAAGGAATAAATATAGTGATAATTTGATTCTTCGTCGCCGTAGTAAATAGGAGATAAAATAGAATTGTTTTTTCGTCTTTACAAAACAAAAAGAAAAAAAAAGAGGAGTAAGCTGTGACACGTTCAGTAAAAAAAAATCCTTTTGTAGCCAACCATTTATTAAAAAAAATGAATAAACTTAACACAAAAGAAGAAAAAGAAATAATCGTAACCTGGTCACGGGCGAACGACGGGAATTGAACCCGCGCAT…
	G. officinalis	GCGTTGGCTAGGTAAGCGTCCTGTAGTAAGAGGAGTAGTTATGAACCCTGTAGACCACCCCCACGGGGGGGGTGAGGGGAGAGCCCCAATTGGTAGAAAAAAACCCACAACCCCTTGGGGTTATCCTGCACTTGGAAGAAGAAGTAGAAAAAGGAATAAATATAGTGATAATTTGATTCTTCGTCGCCGTAGTAAATAGGAGATAAAATAGAATTGTTTTTTCGTCTTTACAAAACAAAAAGAAAAAAAAAGAGGAGTAAGCTGTGACACGTTCAGTAAAAAAAAATCCTTTTGTAGCCAACCATTTATTAAAAAAAATGAATAAACTTAACACAAAAGAAGAAAAAGAAATAATCGTAACCTGGTCACGGGCGAACGACGGGAATTGAACCCGCGCAT…
	G. siphonantha	GCGTTGGCTAGGTAAGCGTCCTGTAGTAAGAGGAGTAGTTATGAACCCTGTAGACCACCCCCACGGGGGGGGTGAGGGGAGAGCCCCAATTGGTAGAAAAAAACCCACAACCCCTTGGGGTTATCCTGCACTTGGAAGAAGAAGTAGAAAAAGGAATAAATATAGTGATAATTTGATTCTTCGTCGCCGTAGTAAATAGGAGATAAAATAGAATTGTTTTTTCGTCTTTACAAAACAAAAAGAAAAAAAAAGAGGAGTAAGCTGTGACACGTTCAGTAAAAAAAAATCCTTTTGTAGCCAACCATTTATTAAAAAAAATGAATAAACTTAACACAAAAGAAGAAAAAGAAATAATCGTAACCTGGTCACGGGCGAACGACGGGAATTGAACCCGCGCAT…
