# Supplementary material for: Comparative Chloroplast Genome Analyses of Species in Gentiana section Cruciata (Gentianaceae) and the Development of Authentication Markers
Source: Int J Mol Sci. 2018 Jul 5;19(7):1962. doi: 10.3390/ijms19071962 (PMC6073106; doi:10.3390/ijms19071962)
Supplement: Supplementary file 1 [file ijms-19-01962-s001.zip › Supplementary Materials/Table S8.xlsx]

## Sheet: Sheet1
Table S8 Sanger sequencing of results for seven species in Gentiana sect. Cruciata based on 16 molecular markers derived from InDel regions
Marker	Region	Species	Sequence
QJcpm1	ndhC-trnV	G. dahurica	GTCATCCATAAATATTTAGTCAAAATCACAACAAGAATTTTTTTGATCAAATTAACGAGTTTCTTGCGTTTATATTGTGGGACATATCTCATTTAAAAATGAAATCCTATTTCTATTCTAGTTTATTTTGAATTCTTTATTCCATTTTTCAACCTATACTTATTAGTAAGTTATTAAAATTAACATCTATTAGAATTATATATATCTTTTTTGAAATTTATGAAAAGAAATCTAAAAAACTAGAAAAAATGAGAAGTTAAATTGAAAATAGTAAAATACCAAATAAACATAATAGAATACAAATCAATAATACTATTAATTAGTTAATACAGGGGTCTTTTTGTCTTTTTTTTTTATTTTCATTAATCATTTGTTTTCTAATTTTATATTATTTTGATC…
		G. officinalis	GTCATCCATAAATATTTAGTCAAAATCACAACAAGAATTTTTTTGATCAAATTAACGAGTTTCTTGCGTTTATATTGTGGGACATATCTCATTTAAAAATGAAATCCTATTTCTATTCTAGTTTATTTTGAATTCTTTATTCCATTTTTCAACCTATACTTATTAGTAAGTTATTAAAATTAACATCTATTAGAATTATATATATCTTTTTTGAAATTTATGAAAAGAAATCTAAAAAACTAGAAAAAATGAGAAGTTAAATTGAAAATAGTAAAATACCAAATAAACATAATAGAATACAAATCAATAATACTATTAATTAGTTAATACAGGGGTCTTTTTGTCTTTTTTTTTTATTTTCATTAATCATTTGTTTTCTAATTTTATATTATTTTGATC…
		G. macrophylla	GTCATCCATAAATATTTAGTCAAAATCACAACAAGAATTTTTTTGATCAAATTAACGAGTTTCTTGCGTTTATATTGTGGGACATATCTCATTTAAAAATGAAATCCTATTTCTATTCTAGTTTATTTTGAATTCTTTATTCCATTTTTCAACCTATACTTATTAGTAAGTTATTAAAATTAACATCTATTAGAATTATATATATCTTTTTTGAAATTTATGAAAAGAAATCTAAAAAACTAGAAAAAATGAGAAGTTAAATTGAAAATAGTAAAATACCAAATAAACATAATAGAATACAAATCAATAATACTATTAATTAGTTAATACAGGGGTCTTTTTGTCTTTTTTTTTTATTTTCATTAATCATTTGTTTTCTAATTTTATATTATTTTGATC…
		G. siphonantha	GTCATCCATAAATATTTAGTCAAAATCACAACAAGAATTTTTTTGATCAAATTAACGAGTTTCTTGCGTTTATATTGTGGGACATATCTCATTTAAAAATGAAATCCTATTTCTATTCTAGTTTATTTTGAATTCTTTATTCCATTTTTCAACCTATACTTATTAGTAAGTTATTAAAATTAACATCTATTAGAATTATATATATCTTTTTTGAAATTTATGAAAAGAAATCTAAAAAACTAGAAAAAATGAGAAGTTAAATTGAAAATAGTAAAATACCAAATAAACATAATAGAATACAAATCAATAATACTATTAATTAGTTAATACAGGGGTCTTTTTGTCTTTTTTTTTTATTTTCATTAATCATTTGTTTTCTAATTTTATATTATTTTGATC…
		G. straminea	GTCATCCATAAATATTTAGTCAAAATCACAACAAGAATTTTTTTGATCAAATTAACGAGTTTCTTGCGTTTATATTGTGGGACATATCTCATTTAAAAATGAAATCCTATTTCTATTCTAGTTTATTTTGAATTCTTTATTCCATTTTTCAACCTATACTTATTAGTAAGTTATTAAAATTAACATCTATTAGAATTATATATATCTTTTTTGAAATTTATGAAAAGAAATCTAAAAAACTAGAAAAAATGAGAAGTTAAATTGAAAATAGTAAAATATCAAATAAACATAATTGAATACAAATCAATAATACTATTAATTAGTTAATACAGGGGTCTTTTTGTCTTTTTTTTTTTATTTTCATTAATCATTTGTTTTCTAATTTTATATTATTTTGAT…
		G. robusta	GTCATCCATAAATATTTAGTCAAAATCACAACTCTCATTTAAAAATGAAATCCTATTTCTATTCTAGTTTATTTTGAATTCTTTATTCCATTTTTCAACCTATACTTATTAGTAAGTTATTAAAATTAACATCTATTAGAATTATATATATCTTTTTTGAAATTTATGAAAAGAAATCTAAAAAACTAGAAAAAATGAGAAGTTAAATTGAAAATAGTAAAATATCAAATAAACATAATTGAATACAAATCAATAATACTATTAATTAGTTAATACAGGGGTCTTTTTGTCTTTTTTTTTTATTTTCATTAATCATTTGTTTTCTAATTTTATATTATTTTGATCTCATATTGGAGTTGTAGTTATTAGGGCTATACGGATTC
		G. crassicaulis	GTCATCCATAAATGTTTAGTCAAAATCACAACAAGAATTTTTTTGATCAAATTAACGAGTTTCTTACGTTTATATTGTGGGACATATCTCATTTAAAAATGAAATCCTATTTCTATTCTAGTTTATTTAGAATTATATATATCTTTTTTGAAATTTATGAAAAGAAATCTAAAAAACTAGAAAAAATGAGAAGTTAAATTGAAAATAGTAAAATATCAAATAAACATAATAGAATACAAATCAATAATACTATTAATTAGTTAATACAGGGGTCTTTTTGTCTTTTTTTTTATTTTCATTAATCATTTGTTTTCTAATTTTATATTATTTTGATCTCATATTGGAGTTGTAGTTATTAGGGCTATACGGATTC
QJcpm2	cemA-petA	G. dahurica	TAAAAAATCCACTGATATTAATCTAATAAAATGAAAATTAGAGCTCTTGTTATTTTGTAGTTGTACATAAACAAAGTATTGAAAATCGTACTTACGTTTTCTATTTTTAACCATCTTCGGGATTCATCCGATATTTATATTATTCTCCAGGAAAATCTCATTCCAGTAAAATTATTCCAGTAAAATTAGTTAAGTAACTAACAGAATCGTGGATAGGGAACTATACTAGCGACTTACCCCCCTTATTGTAATTGTAGAAATTTTTGGATCAACTATTGGACCATGGAAAATAGAAACACTTTTTCTTGGATAAAGGAACAGATTACTCGTTCTATTTCCGTATCACTTCTAATATATATCATAACCCGCCCGGACATTTCAAAAGCATACCCCGTTTTT…
		G. officinalis	TAAAAAATCCACTGATATTAATCTAATAAAATGAAAATTAGAGCTCTTGTTATTTTGTAGTTGTACATAAACAAAGTATTGAAAATCGTACTTACGTTTTCTATTTTTAACCATCTTCGGGATTCATCCGATATTTATATTATTCTCCAGGAAAATCTCATTCCAGTAAAATTATTCCAGTAAAATTAGTTAAGTAACTAACAGAATCGTGGATAGGGAACTATACTAGCGACTTACCCCCCTTATTGTAATTGTAGAAATTTTTGGATCAACTATTGGACCATGGAAAATAGAAACACTTTTTCTTGGATAAAGGAACAGATTACTCGTTCTATTTCCGTATCACTTCTAATATATATCATAACCCGCCCGGACATTTCAAAAGCATACCCCGTTTTT…
		G. macrophylla	TAAAAAATCCACTGATATTAATCTAATAAAATGAAAATTAGAGCTCTTGTTATTTTGTAGTTGTACATAAACAAAGTATTGAAAATCGTACTTACGTTTTCTATTTTTAACCATCTTCGGGATTCATCCGATATTTATATTATTCTCCAGGAAAATCTCATTCCAGTAAAATTATTCCAGTAAAATTAGTTAAGTAACTAACAGAATCGTGGATAGGGAACTATACTAGCGACTTACCCCCCTTATTGTAATTGTAGAAATTTTTGGATCAACTATTGGACCATGGAAAATAGAAACACTTTTTCTTGGATAAAGGAACAGATTACTCGTTCTATTTCCGTATCACTTCTAATATATATCATAACCCGCCCGGACATTTCAAAAGCATACCCCGTTTTT…
		G. siphonantha	TAAAAAATCCACTGATATTAATCTAATAAAATGAAAATTAGAGCTCTTGTTATTTTGTAGTTGTACATAAACAAAGTATTGAAAATCGTACTTACGTTTTCTATTTTTAACCATCTTCGGGATTCATCCGATATTTATATTATTCTCCAGGAAAATCTCATTCCAGTAAAATTAGTTAAGTAACTAACAGAATCGTGGATAGGGAACTATACTAGCGACTTACCCCCCTTATTGTAATTGTAGAAATTTTTGGATCAACTATTGGACCATGGAAAATAGAAACACTTTTTCTTGGATAAAGGAACAGATTACTCGTTCTATTTCCGTATCACTTCTAATATATATCATAACCCGCCCGGACATTTCAAAAGCATACCCCGTTTTTGCACAGCAAGGTTA…
		G. straminea	TAAAAAATCCACTGATATTAATCTAATAAAATGAAAATTAGAGCTCTTGTTATTTTGTAGTTGTACATAAACAAAGTATTGAAAATCGTACTTACGTTTTCTATTTTTAACCATCTTCGGGATTCATCCGATATTTATATTATTCTCCAGGAAAATCTCATTCCAGTAAAATTATTCCAGTAAAATTAGTTAAGTAACTAACAGAATCGTGGATAGGGAACTATACTAGCGACTTACCCCCCTTATTGTAATTGTAGAAATTTTTGGATCAACTATTGGACCATGGAAAATAGAAACACTTTTTCTTGGATAAAGGAACAGATTACTCGTTCTATTTCCGTATCACTTCTAATATATATCATAACCCGCCCGGACATTTCAAAAGCATACCCCGTTTTT…
		G. robusta	TAAAAAATCCACTGATATTAATCTAATAAAATGAAAATTAGAGCTCTTGTTATTTTGTAGTTGTACATAAACAAAGTATTGAAAATCGTACTTACGTTTTCTATTTTTAACCATCTTCGGGATTCATCCGATATTTATATTATTCTCCAGGAAAATCTCATTCCAGTAAAATTATTCCAGTAAAATTAGTTAAGTAACTAACAGAATCGTGGATAGGGAACTATACTAGCGACTTACCCCCCTTATTGTAATTGTAGAAATTTTTGGATCAACTATTGGACCATGGAAAATAGAAACACTTTTTCTTGGATAAAGGAACAGATTACTCGTTCTATTTCCGTATCACTTCTAATATATATCATAACCCGCCCGGACATTTCAAAAGCATACCCCGTTTTT…
		G. crassicaulis	TAAAAAATCCACTGATATTAATCTAATAAAATGAAAATTAGAGCTCTTGTTATTTTGTAGTTGTACATAAACAAAGTATTGAAAATCGTACTTACGTTTTCTATTTTTAACCATCTTCGGGATTCATCCGATATTTATATTATTCTCCAGGAAAATCTCATTCCAGTAAAATTATTCCAGTAAAATTATTCCAGTAAAATTAGTTAAGTAACTAACAGAATCGTGGATAGGGAACTATACTAGCGACTTACCCCCCTTATTGTAATTGTAGAAATTTTTGGATCAACTATTGGACCATGGAAAATAGAAACACTTTTTCTTGGATAAAGGAACAGATTACTCGTTCTATTTCCGTATCGCTTCTAATATATATCATAACCCGCCCGGACATTTCAAAAG…
QJcpm3	rbcL-accD	G. dahurica	TTTCTTTTCGTATTGGTGGATATAATCATCAATTATTCCTTATTTTGAGTTAGTTCGGAGACGAGATTTTACGAAAAAAGAATGATTCATTTATAGGTTATTTATTTATAGGTTATAGGAAAAACAAATATTTCTATTTCTTTTTTTCGATGCGAATATAGTGTATAGTGAAGTATTCCCCCAAATTTTCCTAAAAGAAAAGAGAATTTTTTTTCAATACTTAAAATTCTTAACCTTTTCTTATTAGCCAATAAAAAATCCCATGGCTTTCTATGCTTATTCGCATAGTAAATAAGATATTCCAATCAAATAAATCATTTTAAATCCAATGACTATTCATCTATTCTATTTTTATTATTCTATTTTTATGCAAACAAATAAGGGAAAAGAAAACTTTAT…
		G. officinalis	TTTCTTTTCGTATTGGTGGATATAATCATCAATTATTCCTTATTTTGAGTTAGTTCGGAGACGAGATTTTACGAAAAAAGAATGATTCATTTATAGGTTATTTATTTATAGGTTATAGGAAAAACAAATATTTCTATTTCTTTTTTTCGATGCGAATATAGTGTATAGTGAAGTATTCCCCCAAATTTTCCTAAAAGAAAAGAGAATTTTTTTTCAATACTTAAAATTCTTAACCTTTTCTTATTAGCCAATAAAAAATCCCATGGCTTTCTATGCTTATTCGCATAGTAAATAAGATATTCCAATCAAATAAATCATTTTAAATCCAATGACTATTCATCTATTCTATTTTTATGCAAACAAATAAGGGAAAAGAAAACTTTATGCGAAGATGGTGGT…
		G. macrophylla	TTTCTTTTCGTATTGGTGGATATAATCATCAATTATTTCTTATTTTGAGTTAGTTCGGAGACGAGATTTTACGAAAAAAGAATGATTCATTTATAGGTTATTTATTTATAGGTTATAGGAAAAACAAATATTTCTATTTCTTTTTTTCGATGCGAATATAGTGTATAGTGAAGTATTCCCCCAAATTTTCCTAAAAGAAAAGAGAATTTTTTTTCAATACTTAAAATTCTTAACCTTTTCTTATTAGCCAATAAAAAATCCCATGGCTTTCTATGCTTATTCGCATAGTAAATAAGATATTCCAATCAAATAAATCATTTTAAATCCAATGACTATTCATCTATTCTATTTTTATTATTCTATTTTTATGCAAACAAATAAGGGAAAAGAAAACTTTAT…
		G. siphonantha	TTTCTTTTCGTATTGGTGGATATAATCATCAATTATTCCTTATTTTGAGTTAGTTCGGAGACGAGATTTTACGAAAAAAGAATGATTCATTTATAGGTTATTTATTTATAGGTTATAGGAAAAACAAATATTTCTATTTCTTTTTTTCGATGCGAATATAGTGTATAGTGAAGTATTCCCCCAAATTTTCCTAAAAGAAAAGAGAATTTTTTTTCAATACTTAAAATTCTTAACCTTTTCTTATTAGCCAATAAAAAATCCCATGGCTTTCTATGCTTATTCGCATAGTAAATAAGATATTCCAATCAAATAAATCATTTTAAATCCAATGACTATTCATCTATTCTATTTTTATTATTCTATTTTTATGCAAACAAATAAGGGAAAAGAAAACTTTAT…
		G. straminea	TTTCTTTTCGTATTGGTGGATATAATCATCAATTATTCCTTATTTTGAGTTAGTTCGGAGACGAGATTTTACGAAAAAAGAATGATTCATTTATAGGTTATTTATTTATAGGTTATAGGAAAAACAAATATTTCTATTTCTTTTTTTCGATGCGAATATAGTGTATAGTGAAGTATTCCCCCAAATTTTCCTAAAAGAAAAGAGAATTTTTTTTCAATACTTAAAATTCTTAACCTTTTCTTATTAGCCAATAAAAAATCCCATGGCTTTCTATGCTTATTCGCATAGTAAATAAGATATTCCAATCAAATAAATCATTTTAAATCCAATGACTATTCATCTATTCTATTTTTATTATTCTATTTTTATGCAAACAAATAAGGGAAAAGAAAACTTTAT…
		G. robusta	TTTCTTTTCGTATTGGTGGAATATAATCATCAATTATTCCTTATTTTGAGTTAGTTCGGAGACGAGATTTTACGAAAAAAGAATGATTCATTTATAGGTTATTTATTTATAGGTTATAGGAAAAACAAATATTTCTATTTCTTTTTTTCGATGCGAATATAGTGTATAGTGAAGTATTCCCCCAAATTTTCCTAAAAGAAAAGAGAATTTTTTTTCAATACTTAAAATTCTTAACCTTTTCTTATTAGCCAATAAAAAATCCCATGGCTTTCTATGCTTATTCGCATAGTAAATAAGATATTCCAATCAAATAAATCATTTTAAATCCAATGACTATTCATCTATTCTATTTTTATTATTCTATTTTTATGCAAACAAATAAGGGAAAAGAAAACTTTA…
		G. crassicaulis	TTTCTTTTCGTATTGGTGGAATATAATCATCAATTATTCCTTATTTTGAGTTAGTTCGGAGACGAGATTTTACGAAAAAAGAATGATTCATTTATAGGTTATTTATTTATAGGTTATAGGAAAAACAAATATTTCTATTTCTTTTTTTCGATGCGAATTTGACACGACATAGGGGAAAGTGCTCTTTTTCATTTTCTTTCTGATAAGCAGGGGTTTTATTCTATTCATATATAGTGTATAGTGAAGTATTCCCCCAAATTTTCCTAAAAGAAAAGAGAATTTTTTTTCAATACTTAAAATTCTTAACCTTTTCTTATTAGCCAATAAAAAATAAAAAATCCCATGGCTTTCTATGCTTATTCGCATAGTAAATAAGATATTCCAATCAAATAAATCATT…
QJcpm4	rpl33-rps18	G. dahurica	GATGTACCAGCTGTGCCCGAACAACGTTAATAGGGTATCAACGGGCATTTCCAGATATATTACTCAAAAGAACCGCCACAATACACCTAATCGATTAGAATTGAGAAAGTTCTGTCCGTATTGTTATAAGCATAAGATTCATGGGGAGATAAAGAAATAGATCTAATTGAGTACCTGTATATTACCCCTTCAAGTAAGGCAAGTAAGGGAAGGGGGTGGCATTCTATCTATATCTATCTATAATTCAAAATTAAATCGAATAGAACAATTCTATATAAATAGAAATCTAAATCGAAAAAAATCCTATTTTAATTTTGAATTAAAATGAATTCAAATTAAGAAATAGAATTTTAAAGAAAAAGAATAAAATTAAATAATAAAACAAACCATGGATAAATC…
		G. officinalis	GATGTACCAGCTGTGCCCGAACAACGTTAATAGGGTATCAACGGGCATTTCCAGATATATTACTCAAAAGAACCGCCACAATACACCTAATCGATTAGAATTGAGAAAGTTCTGTCCGTATTGTTATAAGCATAAGATTCATGGGGAGATAAAGAAATAGATCTAATTGAGTACCTGTATATTACCCCTTCAAGTAAGGCAAGTAAGGGAAGGGGGTGGCATTCTATCTATATCTATCTATAATTCAAAATTAAATCGAATAGAACAATTCTATATAAATAGAAATCTAAATCGAAAAAAATCCTATTTTAATTTTGAATTAAAATGAATTCAAATTAAGAAATAGAATTTTAAAGAAAAAGAATAAAATTAAATAATAAAACAAACCATGGATAAATC…
		G. macrophylla	GATGTACCAGCTGTGCCCGAACAACGTTAATAGGGTATCAACGGGCATTTCCAGATATATTACTCAAAAGAACCGCCACAATACACCTAATCGATTAGAATTGAGAAAGTTCTGTCCGTATTGTTATAAGCATAAGATTCATGGGGAGATAAAGAAATAGATCTAATTGAGTACCTGTATATTACCCCTTCAAGTAAGGCAAGTAAGGGAAGGGGGTGGCATTCTATCTATATCTATCTATAATTCAAAATTAAATCGAATAGAACAATTCTATATAAATAGAAATCTAAATCGAAAAAAATCCTATTTTAATTTTGAATTAAAATGAATTCAAATTAAGAAATAGAATTTTAAAGAAAAAGAATAAAATTAAATAATAAAACAAACCATGGATAAATC…
		G. siphonantha	GATGTACCAGCTGTGCCCGAACAACGTTAATAGGGTATCAACGGGCATTTCCAGATATATTACTCAAAAGAACCGCCACAATACACCTAATCGATTAGAATTGAGAAAGTTCTGTCCGTATTGTTATAAGCATAAGATTCATGGGGAGATAAAGAAATAGATCTAATTGAGTACCTGTATATTACCCCTTCAAGTAAGGCAAGTAAGGGAAGGGGGTGGCATTCTATCTATATCTATCTATAATTCAAAATTAAATCGAATAGAACAATTCTATATAAATAGAAATCTAAATCGAAAAAAATCCTATTTTAATTTTGAATTAAAATGAATTCAAATTAAGAAATAGAATTTTAAAGAAAAAGAATAAAATTAAATAATAAAACAAACCATGGATAAATC…
		G. straminea	GATGTACCAGCTGTGCCCGAACAACGTTAATAGGGTATCAACGGGCATTTCCAGATATATTACTCAAAAGAACCGCCACAATACACCTAATCGATTAGAATTGAGAAAGTTCTGTCCGTATTGTTATAAGCATAAGATTCATGGGGAGATAAAGAAATAGATCTAATTGAGTACCTGTATATTACCCCTTCAAGTAAGGCAAGGGCAAGTAAGGGAAGGGGGTGGCATTCTATCTATATCTATCTATAATTCAAAATTAAATCGAATAGAACAATTCTATATAAATAGAAATCTAAATCGAAAAAAATCCTATTTTAATTTTGAATTAAAATGAATTCAAATTAAGAAATAGAATTTTAAAGAAAAAGAATAAAATTAAATAATAAAACAAACCATGGA…
		G. robusta	GATGTACCAGCTGTGCCCGAACAACGTTAATAGGGTATCAACGGGCATTTCCAGATATATTACTCAAAAGAACCGCCACAATACACCTAATCGATTAGAATTGAGAAAGTTCTGTCCGTATTGTTATAAGCATAAGATTCATGGGGAGATAAAGAAATAGATCTAATTGAGTACCTGTATATTACCCCTTCAAGTAAGGCAAGGGCAAGTAAGGGAAGGGGGTGGCATTCTATCTATATCTATCTATAATTCAAAATTAAATCGAATAGAACAATTCTATATAAATAGAAATCTAAATCGAAAAAAATCCTATTTTAATTTTGAATTAAAATGAATTCAAATTAAGAAATAGAATTTTAAAGAAAAAGAATAAAATTAAATAATAAAACAAACCATGGA…
		G. crassicaulis	GATGTACCAGCTGTGCCCGAACAACGTTAATAGGGTATCAACGGGCATTTCCAGATATATTACTCAAAAGAACCGCCACAATACACCTAATCGATTAGAATTGAGAAAGTTCTGTCCGTATTGTTATAAGCATACGATTCATGGGGAGATAAAGAAATAGATCTAATTGAGTACCTGTATATTACCCCTTCAAGTAAGGCAAGTAAGGCAAGTAAGGGAAGTAAGGGAAGGGGGTGGCATTCTATCTATATCTATCTATAATTCAAAATTAAATCGAATAGAACAATTCTATATAAATAGAAATCTAAATCGAAAAAAATCCTATTTTAATTTTGAATTAAAATGAATTCAAATTAAGAAATAGAATTTTAAAGAAAAAGAATAAAATTAAATAATAAA…
QJcpm5	atpB-rbcL	G. dahurica	CAATTTTTTGTGAAATTATCGAATTCAAAAGAAGTATCCCAGAGCGCGTGGATCAGTTAATTCAATACAATATAGGAAAAGAGTCTATTTTCGAATTTAACCAATTTTTTTTAGAATATCAACCAGACAATGCTATTTAGATGCTATTTAGATTATCTATTCTATGAAATTCGAACCCCAACGCGATCTATATTATGATTCATTATTTGTACCCCACCAACTTTCTTTTCGATTTATTTAGACATATGGATTTCTGTCTAGACTATTTGTTTTTTTTATACCCTAACCTTTCATAGCTGAATTTTCACATCTAGGATTTACATATACAACATATACTGCTGTCAAGGAGGAATTTCTTATTAGTTATTAGTTAGTTCAATTCAAAAAAGACCAAGGTAA…
		G. officinalis	CAATTTCTTTGTGAAATTATCGAATTCAAAAGAAGTATCCCAGAGCGCGTGGATCAGTTAATTCAATACAATATAGGAAAAGAGTCTATTTTCGAATTTAACCAATTTTTTTTAGAATATCAACCAGACAATGCTATTTAGATGCTATTTAGATTATCTATTCTATGAAATTCGAACCCCAACGCGATCTATATTATGATTCATTATTTGTACCCCACCAACTTTCTTTTCGATTTATTTAGACATATGGATTTCTGTCTAGACTATTTGTTTTTTTTATACCCTAACCTTTCATAGCTGAATTTTCACATCTAGGATTTACATATACAACATATACTGCTGTCAAGGAGGAATTTCTTATTAGTTATTAGTTAGTTCAATTCAAAAAAGACCAAGGTA…
		G. macrophylla	CAATTCTTTGTGAAATTATCGAATTCAAAAGAAGTATCCCAGAGCGCGTGGATCAGTTAATTCAATACAATATAGGAAAAGAGTCTATTTTCGAATTTAACCAATTTTTTTTAGAATATCAACCAGACAATGCTATTTAGATGCTATTTAGATTATCTATTCTATGAAATTCGAACCCCAACGCGATCTATATTATGATTCATTATTTGTACCCCACCAACTTTCTTTTCGATTTATTTAGACATATGGATTTCTGTCTAGACTATTTGTTTTTTTTATACCCTAACCTTTCATAGCTGAATTTTCACATCTAGGATTTACATATACAACATATACTGCTGTCAAGGAGGAATTTCTTATTAGTTAGTTCAATTCAAAAAAGACCAAGGTAAAAAAGAA…
		G. siphonantha	CAATTCTTTGTGAAATTATCGAATTTCAAAAGAAGTATCCCAGAGCGCGTGGATCAGTTAATTCAATACAATATAGGAAAAGAGTCTATTTTCGAATTTAACCAATTTTTTTTAGAATATCAACCAGACAATGCTATTTAGATGCTATTTAGATTATCTATTCTATGAAATTCGAACCCCAACGCGATCTATATTATGATTCATTATTTGTACCCCACCAACTTTCTTTTCGATTTATTTAGACATATGGATTTCTGTCTAGACTATTTGTTTTTTTTATACCCTAACCTTTCATAGCTGAATTTTCACATCTAGGATTTACATATACAACATATACTGCTGTCAAGGAGGAATTTCTTATTAGTTATTAGTTAGTTCAATTCAAAAAAGACCAAGGTA…
		G. straminea	CAATTTTTTGTGAAATTATCGAATTCAAAAGAAGTATCCCAGAGCGCGTGGATCAGTTAATTCAATACAATATAGGAAAAGAGTCTATTTTCGAATTTAACCAATTTTTTTAGAATATCAACCAGACAATGCTATTTAGATGCTATTTAGATTATCTATTCTATGAAATTTGAACCCCAACGCGATCTATATTACGATTCATTATTTGTACCCCACCAACTTTCTTTTCGATTTATTTAGACATATGGATTTCTGTCTAGACTATTTGTTTTTTTTATACCCTAACCTTTCATAGCTGAATTTTCACATCTAGGATTTACATATACAACATATACTGCTGTCAAGGAGGAATTTCTTATTAGTTATTAGTTAGTTCAATTCAAAAAAGACCAAGGTAAA…
		G. robusta	CAATTTTTTTGTGAAATTATCGAATTCAAAAGAAGTATCCCAGAGCGCGTGGATCAGTTAATTCAATACAATATAGGAAAAGAGTCTATTTTCGAATTTAACCAATTTTTTTAGAATATCAACCAGACAATGCTATTTAGATGCTATTTAGATTATCTATTCTATGAAATTTGAACCCCAACGCGATCTATATTACGATTCATTATTTGTACCCCACCAACTTTCTTTTCGATTTATTTAGACATATGGATTTCTGTCTAGACTATTTGTTTTTTTTATACCCTAACCTTTCATAGCTGAATTTTCACATCTAGGATTTACATATACAACATATACTGCTGTCAAGGAGGAATTTCTTATTAGTTAGTTCAATTCAAAAAAGACCAAGGTAAAAAAGAA…
		G. crassicaulis	CAATTTCTTCGTGAAATTTCTCGAATTTCAAAAGAAGTATCCCAGAGCGCGTGGATCAGTTAATTCAATACAATATAGGAAAAGAGTCTATTTTCGAATTTAACCAATTTTTTTTAGAATATCAACCAGACAATGCTATTTAGATTATCTATTCTATGAAATTCGAACCCCAACGCGATCTATATTACGATTCATTATTTGTACCCCACCGACTTTATAACTTTTCGATTTATTTAGACATATGGAGTTCTGTCTAGACTATTTGTTTTGTTTTTTATACCCTAACCTTTCATAGCTGAATTTTCACATCTAGGATTTACATATACAACATATACTGCTGTCAAGGAGGAATTTCTTATTAGTTATTAGTTAGTTCAATTCAAAAAAGACCAAGGTAAA…
QJcpm6	ycf1_1	G. dahurica	GTGTCCGGTTTGAGATTGAATTTGATTAATCAATGATTCAGGAATTATCTCATTGATGTTTGTAGAATCTTTGTTGTTTTTTGTTTGATTCGATTTATAGACCTTTCTTACGTTAAAGAATAAGATTGGGTTTAATTTTGAAAATACTCTTATTTTTTTTTTTATTTTTATAAAAAATGAATTTCGTATAACCCAATTTTTTATTTGTTTTGAAACTAATTTCGTCTTTCCCCTTAAAGTTTTTCGAACTAAAAAATAGGTATTTTTCGATTTTCCAATCTTTCTTTCCAATTCCTTAAAAATAGGTTTAAAAAAGGAAAATCGTTGTCGAGGAAAACCAAAAGGAAGGTCCGTTTCTAGCCCCCAAACTGTTAAAAAACAAAAATCATTTCTTTCTTT…
		G. officinalis	GTGTCCGGTTTGAAGATTGAATTTGATTAATCAATGATTCAGGAATTATCTCATTGATGTTTGTAGAATCTTTGTTGTTTTTTGTTTGATTCGATTTATAGACCTTTCTTACGTTAAAGAATAAGATTGGGTTTAATTTTGAAAATACTCTTATTTTTTTTTTTATTTTTATAAAAAATGAATTTCGTATAACCCAATTTTTTATTTGTTTTGAAACTAATTTCGTCTTTCCCCTTAAAGTTTTTCGAACTAAAAAATAGGTATTTTTCGATTTTCCAATCTTTCTTTCCAATTCCTTAAAAATAGGTTTAAAAAAGGAAAATCGTTGTCGAGGAAAACCAAAAGGAAGGTCCGTTTCTAGCCCCCAAACTGTTAAAAAACAAAAATCATTTCTTTCTT…
		G. macrophylla	GTGTCCGGTTTGAAGATTGAATTTGATTAATCAATGATTCAGGAATTATCTCATTGATGTTTGTAGAATCTTTGTTGTTTTTTGTTTGATTCGATTTATAGACCTTTCTTACGTTAAAGAATAAGATTGGGTTTAATTTTGAAAATACTCTTATTTTTTTTTTTATTTTTATAAAAAATGAATTTCGTATAACCCAATTTTTTATTTGTTTTGAAACTAATTTCGTCTTTCCCCTTAAAGTTTTTCGAACTAAAAAATAGGTATTTTTCGATTTTCCAATCTTTCTTTCCAATTCCTTAAAAATAGGTTTAAAAAAGGAAAATCGTTGTCGAGGAAAACCAAAAGGAAGGTCCGTTTCTAGCCCCCAAACTGTTAAAAAACAAAAATCATTTCTTTCTT…
		G. siphonantha	GTGTCCGGTTTGAAGATTGAATTTGATTAATCAATGATTCAGGAATTATCTCATTGATGTTTGTAGAATCTTTGTTGTTTTTTGTTTGATTCGATTTATAGACCTTTCTTACGTTAAAGAATAAGATTGGGTTTAATTTTGAAAATACTCTTATTTTTTTTTTTATTTTTATAAAAAATGAATTTCGTATAACCCAATTTTTTATTTGTTTTGAAACTAATTTCGTCTTTCCCCTTAAAGTTTTTCGAACTAAAAAATAGGTATTTTTCGATTTTCCAATCTTTCTTTCCAATTCCTTAAAAATAGGTTTAAAAAAGGAAAATCGTTGTCGAGGAAAACCAAAAGGAAGGTCCGTTTCTAGCCCCCAAACTGTTAAAAAACAAAAATCATTTCTTTCTT…
		G. straminea	GTGTCCGGTTTGAAGATTGAATTTGATTAATCAATGATTCAGGAATTATCTCATTGATGTTTGTAGAATCTTTGTTGTTTTTTGTTTGATTCGATTTATAGACCTTTCTTACGTTAAAGAATAAGATTGGGTTTAATTTTGAAAATACTCTTATTTTTTTTATTTGTTTTGAAACTAATTTCGTCTTTCCCCTTAAAGTTTTTCGAACTAAGAAATAGGTATTTTTCGATTTTGCAATCTTTCTTTCCAATTCCTTAAAAATAGGTTTAAAAAAGGAAGATCGTTGTCGAGGAGAACCAAAAGGAAGGTCCGTTTCTAGCCCCCAAACTGTTAAAAAACAAAAATCATTTCTTTCTTTTTTGTTTTGCATTAGATTTCTACGAGAGGGCCGGAGTTTA
		G. robusta	GTGTCCGGTTTGAGATTGAATTTGATTAATCAATGATTCAGGAATTATCTCATTGATGTTTGTAGAATCTTTGTTGTTTTTTGTTTGATTCGATTTATAGACCTTTCTTACGTTAAAGGATAAGATTGGGTTTAATTTTGAAAATACTCTTATTTTTTTTATTTGTTTTGAAACTAATTTCGTCTTTCCCCTTAAAGTTTTTCGAACTAAAAAATAGGTATTTTTCGATTTTGCAATCTTTCTTTCCAATTCCTTAAAAATAGGTTTAAAAAAGGAAAATCGTTGTCGAGGAGAACCAAAAGGAAGGTCCGTTTCTAGCCCCCAAACTGTTAAAAAACAAAAATCATTTCTTTCTTTTTTGTTTTGCATTAAATTTCTACAAGAGGGCCGGAGTTTA
		G. crassicaulis	GTGTCCGGTTTGAAGATTGAATTTGATTAATCAATGATTCAGGAATTATCTCATTGATGTTTGTAGAATCTTTGTTGTTTTTTGTTTGATTCGATTTATAGACCTTTCTTACGTTAAAGAATAAGATTGAGTTTAATTTTGAAAATACTCTTATTTTTTTTTTTATTTTTATAAAAAAGGAATTTCGTATAACCCAATTTTTTATTTGTTTTGAAACTAATTTCGTCTTTCCCCTTAAAGTTTTTCAAACTAAAAAATAGGTATTTTTCGATTTTCTAATCTTTGTTTCCAATTCCTTAAAAATAGGTTTAAAAAAGGAAAATCGTTGTCGAGGAAAACCAAAAGGAAGGTCCGTTTCCAGCCCCCAAACTGTTAAAAAACAAAAATCATTTATTTCTT…
QJcpm7	ycf1_2	G. dahurica	TGGACTCGGTATTAATTCATATGACCGCCGGGGAACTCTTTTACTGATTTCTTTTAGTCCACTAGATTCTTTTGTAATTTTTTTGAGATTAGGGTGGTTTCGAACGGTCTTAAAAAAAATTTTGAAAAATTCTCTTTCTTTTTCAAAATCTGTTTTTACTCCTCCTTGGTCTGACAATAAACAAGGATTTAAATTTAAATTATGACAAGGATTTAAATTTAAATTATGAGTTGGTTCGGTATCAAATTCACCAGTTAATAGTAATAAATTATTACTAGAAATTGAGAATTTATATTTATTATTATATTGAGCTTCGTCCTCTTTTAGTTCAATTTTTTCGGAATCAGAATAGGTAAAAAGGATATCATGAATCTGATTTATACCAACTGTCTCTCTTAA…
		G. officinalis	TGGACTCGGTAATTAATTCATATGACCGCCGGGGAACTCTTTTACTGATTTCTTTTAGTCCACTAGATTCTTTTGTAATTTTTTTGAGATTAGGGTGGTTTCGAACGGTCTTAAAAAAAATTTTGAAAAATTCTCTTTCTTTTTCAAAATCTGTTTTTACTCCTCCTTGGTCTGACAATAAACAAGGATTTAAATTTAAATTATGAGTTGGTTCGGTATCAAATTCACCAGTTAATAGTAATAAATTATTACTAGAAATTGAGAATTTATATTTATTATTATATTGAGCTTCGTCCTCTTTTAGTTCAATTTTTTCGGAATCAGAATAGGTAAAAAGGATATCATGAATCTGATTTATACCAACTGTCTCTCTTAAATTTTCTTTATAAGTTTTCAGAT…
		G. macrophylla	TGGACTCGGTATTAATTCATATGACCGCCGGGGAACTCTTTTACTGATTTCTTTTAGTCCACTAGATTCTTTTGTAATTTTTTTGAGATTAGGGTGGTTTCGAACGGTCTTAAAAAAAATTTTGAAAAATTCTCTTTCTTTTTCAAAATCTGTTTTTACTCCTCCTTGGTCTGACAATAAACAAGGATTTAAATTTAAATTATGAGTTGGTTCGGTATCAAATTCACCAGTTAATAGTAATAAATTATTACTAGAAATTGAGAATTTATATTTATTATTATATTGAGCTTCGTCCTCTTTTAGTTCAATTTTTTCGGAATCAGAATAGGTAAAAAGGATATCATGAATCTGATTTATACCAACTGTCTCTCTTAAATTTTCTTTATAAGTTTTCAGATT…
		G. siphonantha	TGGACTCGGTAATTAATTCATATGACCGCCGGGGAACTCTTTTACTGATTTCTTTTAGTCCACTAGATTCTTTTGTAATTTTTTTGAGATTAGGGTGGTTTCGAACGGTCTTAAAAAAAATTTTGAAAAATTCTCTTTCTTTTTCAAAATCTGTTTTTACTCCTCCTTGGTCTGACAATAAACAAGGATTTAAATTTAAATTATGACAAGGATTTAAATTTAAATTATGAGTTGGTTCGGTATCAAATTCACCAGTTAATAGTAATAAATTATTACTAGAAATTGAGAATTTATATTTATTATTATATTGAGCTTCGTCCTCTTTTAGTTCAATTTTTTCGGAATCAGAATAGGTAAAAAGGATATCATGAATCTGATTTATACCAACTGTCTCTCTTA…
		G. straminea	TGGACTCGGTATTAATTCATATGACCGCCGGGGAACTCTTTTACTGATTTCTTTTAGTCCACTAGATTCTTTTGTAATTTTTTTGAGATTAGGGTGGTTTCGAACGGTCTTAAAAAAAATTTTGAAAAATTCTCTTTCTTTTTCAAAATCTGTTTTTACTCCTCCTTGGTCTGACAATAAACAAGGATTTAAATTTAAATTATGAGTTGGTTCGGTATCAAATTCACCAGTTAATAGTAATAAATTATTACTAGAAATTGAGAATTTATATTTATTATTATATTGAGCTTCGTCCTCTTTTAGTTCAATTTTTTCGGAATCAGAATAGGTAAAAAGGATATCATGAATCTGATTTATACCAACTGTCTCTCTTAAATTTTCTTTATAAGTTTTCAGATT…
		G. robusta	TGGACTCGGTATTAATTCATATGACCGCCGGGGAACTCTTTTACTGATTTCTTTTAGTCCACTAGATTCTTTTGTAATTTTTTTGAGATTAGGGTGGTTTCGAACGGTCTTAAAAAAAATTTTGAAAAATTCTCTTTCTTTTTCAAAATCTGTTTTTACTCCTCCTTGGTCTGACAATAAACAAGGATTTAAATTTAAATTATGAGTTGGTTCGGTATCAAATTCACCAGTTAATAGTAATAAATTATTACTAGAAATTGAGAATTTATATTTATTATTATATTGAGCTTCGTCCTCTTTTAGTTCAATTTTTTCGGAATCAGAATAGGTAAAAAGGATATCATGAATCTGATTTATACCAACTGTCTCTCTTAAATTTTCTTTATAAGTTTTCAGATT…
		G. crassicaulis	TGGACTCGGTATTAATTCATATGACCGCCGGGGAACTCTTTTACTGATTTCTTTTAGTCTACTAGATTCTTTTGTAATTTTTTTGAGATTAGGATGGTTTCGAACGGTCTTAAAAAAAATTTTGAAAAATTCTCTTTCTTTTTCAAAATCTGTTTTTACTCCTCCTTGGTCTGACAATAAACAAGGATTTAAATTTAAATTATGAGTTGGTTCGGTATCAAATTCACCAGCTAATAGTAATAAATTATTACTAGAAATTGAGAATTTATATTTATTATTATATTGAGCTTCGTCCTCTTTTAGTTCAATTTTTTCGGAATCAGAATAGGTAAAAAGGATATCATGAATCTGATTTATACCAACTGTCTCTCTTAAATTTTCTTTATAAGTTTTCAGATT…
QJcpm8	rps8-rpl14	G. dahurica	ATTTTTACAACATTTTCGGTACTATTAGTCGATGTTATTCGAACCACTCTTTTTTGATCCATATAAGCATTTCGTATAGAGGTTAATATCTCAGCAATAGTGTCTCTACCCATTATGCCTAAAATTTTTATTAACTCATTATTTGATATAATCAACATGTTTTTTTGTTTATGAATAATTTAAGGTATATGCGCGAGATACAATCTATCTCTTAATCTATTTTCTTTTTCAAATAACCTATTCTAAAAATAATTTTAGAATACCTCGGGAGCTAAGGAAACTATTTTAGTAAAATTGAGTTTTCTTAATTCACGGGCGATCGCACCAAAAATTCGAGTTCCTCTTGGATTTCCTTCTTGATCAATAACAACTGCAGCATTGTCATCATATTGTATTATT…
		G. officinalis	ATTTTTACAACATTTTCGGTACTATTAGTCGATGTTATTCGAACCACTCTTTTTTGATCCATATAAGCATTTCGTATAGAGGTTAATATCTCAGCAATAGTGTCTCTACCCATTATGCCTAAAATTTTTATTAACTCATTATTTGATATAATCAACATGTTTTTTTGTTTATGAATAATTTAAGGTATATGCGCGAGATACAATCTATCTCTTAATCTATTTTCTTTTTCAAATAACCTATTCTAAAAATAATTTTAGAATACCTCGGGAGCTAAGGAAACTATTTTAGTAAAATTGAGTTTTCTTAATTCACGGGCGATCGCACCAAAAATTCGAGTTCCTCTTGGATTTCCTTCTTGATCAATAACAACTGCAGCATTGTCATCATATTGTATTATT…
		G. macrophylla	ATTTTTACAACATTTTCGGTACTATTAGTCGATGTTATTCGAACCACTCTTTTTTGATCCATATAAGCATTTCGTATAGAGGTTAATATCTCAGCAATAGTGTCTCTACCCATTATGCCTAAAATTTTTATTAACTCATTATTTGATATAATCAACATGTTTTTTTGTTTATGAATAATTTAAGGTATATGCGCGAGATACAATCTATCTCTTAATCTATTTTCTTTTTCAAATAACCTATTCTAAAAATAATTTTAGAATACCTCGGGAGCTAAGGAAACTATTTTAGTAAAATTGAGTTTTCTTAATTCACGGGCGATCGCACCAAAAATTCGAGTTCCTCTTGGATTTCCTTCTTGATCAATAACAACTGCAGCATTGTCATCATATTGTATTATT…
		G. siphonantha	ATTTTTACAACATTTTCGGTACTATTAGTCGATGTTATTCGAACCACTCTTTTTTGATCCATATAAGCATTTCGTATAGAGGTTAATATCTCAGCAATAGTGTCTCTACCCATTATGCCTAAAATTTTTATTAACTCATTATTTGATATAATCAACATGTTTTTTTGTTTATGAATAATTTAAGGTATATGCGCGAGATACAATCTATCTCTTAATCTATTTTCTTTTTCAAATAACCTATTCTAAAAATAATTTTAGAATACCTCGGGAGCTAAGGAAACTATTTTAGTAAAATTGAGTTTTCTTAATTCACGGGCGATCGCACCAAAAATTCGAGTTCCTCTTGGATTTCCTTCTTGATCAATAACAACTGCAGCATTGTCATCATATTGTATTATT…
		G. straminea	ATTTTTACAACATTTTCGGTACTATTAGTCGATGTTATTCGAACCACTCTTTTTTGATCCATATAAGCATTTCGTATAGAGGTTAATATCTCAGCAATAGTGTCTCTACCCATTATGCCTAAAATTTTTATTAACTCATTATTTGATATAATCAACATGTTTTTTTGTTTATGAATAATTTAAGGTATATGCGCGAGATACAATCTATCTCTTAATCTATTTTCTTTTTCAAATAACCTATTCTAAAAATTCTAAAAATAATTTTAGAATACCTCGGGAGCTAAGGAAACTATTTTAGTAAAATTGAGTTTTCTTAATTCACGGGCGATCGCACCAAAAATTCGAGTTCCTCTTGGATTTCCTTCTTGATCAATAACAACTGCAGCATTGTCATCATAT…
		G. robusta	ATTTTTACAACATTTTCGGTACTATTAGTCGATGTTATTCGAACCACTCTTTTTTGATCCATATAAGCATTTCGTATAGAGGTTAATATCTCAGCAATAGTGTCTCTACCCATTATGCCTAAAATTTTTATTAACTCATTATTTGATATAATCAACATGTTTTTTTGTTTATGAATAATTTAAGGTATATGCGCGAGATACAATCTATCTCTTAATCTATTTTCTTTTTCAAATAACCTATTCTAAAAATTCTAAAAATAATTTTAGAATACCTCGGGAGCTAAGGAAACTATTTTAGTAAAATTGAGTTTTCTTAATTCACGGGCGATCGCACCAAAAATTCGAGTTCCTCTTGGATTTCCTTCTTGATCAATAACAACTGCAGCATTGTCATCATAT…
		G. crassicaulis	ATTTTTACAACATTTTCGGTACTATTAGTCGATGTTATTCGAACCACTCTTTTTTGATCCATATAAGCATTTCGTATAGAGGTTAATATCTCAGCAATAGTGTCTCTACCCATTATGCCTAAAATTTTTATTAACTCATTATTTGATATAATCAACATGTTTTTTTGTTTATGAATAATTTAAGGTATATGCGCGAGATACAATCTATCTCTTAATCTATTTTCTTTTTCAAATAACCTATTCTAAAAATAATTTTAGAATACCTCGGGAGCTAAGGAAACTATTTTAGTAAAATTGAGTTTTCTTAATTCACGGGCGATCGCACCAAAAATTCGAGTTCCTCTTGGATTTCCTTCTTGATCAATAACAACTGCAGCATTGTCATCATATTGTATTATT…
QJcpm9	rps16-trnQ	G. dahurica	TTTATTCTAACAAATATTACTTTTGAATTGGAAATTTGCTCGATTGGGATCCCTTCAATTTATATAGATTTACAGTTTACGAAGTTATTTCAATTTTTTGATTTACATTAACCCTAGGTTTTTGTTCCGAGAAAAAAATGAATACTTTCTACTCGAGCTGCATCGTGGACTATTTACCCTCCCAACGGATGTCAAGACAAGAGCACCTTCGTTTCTATAGAACTATAGAAATAGAAGATGATGGATAGAAGAAGGAATACACAGCGGATCGTGTCCTTCAAGTCGCACGTTGCTTTCTACCACATCGTTTCAAACGAAGTTTTACTATAACATTAACATTCTTCTAATTTGGAACCAGTATGGAATTGATTCAATTAGGGAATCATGAATAGTCGTTGG…
		G. officinalis	TTTATTCTAACAAATATTACTTTTGAATTGGAAATTTGCTCGATTGGGATCCCTTCAATTTATATAGATTTACAGTTTACGAAGTTATTTCAATTTTTTGATTTACATTAACCCTAGGTTTTTGTTCCGAGAAAAAAATGAATACTTTCTACTCGAGCTGCATCGTGGACTATTTACCCTCCCAACGGATGTCGAGACAAGAGCACCTTCGTTTCTATAGAACTATAGAAATAGAAGATGATGGATAGAAGAAGGAATACACAGCGGATCGTGTCCTTCAAGTCGCACGTTGCTTTCTACCACATCGTTTCAAACGAAGTTTTACTATAACATTAACATTCTTCTAATTTGGAACCAGTATGGAATTGATTCAATTAGGGAATCATGAATAGTCGTTGG…
		G. macrophylla	TTTATTCTAACAAATATTACTTTTGAATTGGAAATTTGCTCGATTGGGATCCCTTCAATTTATATAGATTTACAGTTTACGAAGTTATTTCAATTTTTTGATTTACATTAACCCTAGGTTTTTGTTCCGAGAAAAAAATGAATACTTTCTACTCGAGCTGCATCGTGGACTATTTACCCTCCCAACGGATGTCGAGACAAGAGCACCTTCGTTTCTATAGAACTATAGAAATAGAAGATGATGGATAGAAGAAGGAATACACAGCGGATCGTGTCCTTCAAGTCGCACGTTGCTTTCTACCACATCGTTTCAAACGAAGTTTTACTATAACATTAACATTCTTCTAATTTGGAACCAGTATGGAATTGATTCAATTAGGGAATCATGAATAGTCGTTGG…
		G. siphonantha	TTTATTCTAACAAATATTACTTTTGAATTGGAAATTTGCTCGATTGGGATCCCTTCAATTTATATAGATTTACAGTTTACGAAGTTATTTCAATTTTTTGATTTACATTAACCCTAGGTTTTTGTTCCGAGAAAAAAATGAATACTTTCTACTCGAGCTGCATCGTGGACTATTTACCCTCCCAACGGATGTCAAGACAAGAGCACCTTCGTTTCTATAGAACTATAGAAATAGAAGATGATGGATAGAAGAAGGAATACACAGCGGATCGTGTCCTTCAAGTCGCACGTTGCTTTCTACCACATCGTTTCAAACGAAGTTTTACTATAACATTAACATTCTTCTAATTTGGAACCAGTATGGAATTGATTCAATTAGGGAATCATGAATAGTCGTTGG…
		G. straminea	TTTATTCTAACAAATATTACTTTTGAATTGGAAATTTGCTCGATTGGGATCCCTTCAATTTATATAGATTTACAGTTTACGAAGTTATTTCAATTTTTTGATTTACATTAACCCTAGGTTTTTGTTCCGAGAAAAAAATGAATACTTTCTACTCGAGCTACATCGTGGACTATTTACCCTCCCAACGGATGTCGAGACAAGAGCACCTTCGTTTCTATAGAACTATAGAAATAGAAGATGATGGATAGAAGAAGGAATACACAGCGGATCGTGTCCTTCAAGTCGCACGTTGCTTTCTACCACATCGTTTCAAACGAAGTTTTACTATAACATTAACATTCTTCTAATTTGGAACCAGTATGGAATTGATTCAATTAGGGAATCATGAATAGTCGTTGG…
		G. robusta	TTTATTCTAACAAATATTACTTTTGAATTGGAAATTTGCTCGATTGGGATCCCTTCAATTTATATAGATTTACAGTTTACGAAGTTATTTCAATTTTTTGATTTACATTAACCCTAGGTTTTTGTTCCGAGAAAAAAATGAATACTTTCTACTCGAGCCACATCGTGTACTATTTACCCTCCCAACGGATGTCGAGACAAGAGCACCTTCGTTTCTATAGAACTATAGAAATAGAAGATGATGGATAGAAGAAGGAATACACAGCGGATCGTGTCCTTCAAGTCGCACGTTGCTTTCTACCACATCGTTTCAAACGAAGTTTTACTATAACATTAACATTCTTCTAATTTGGAACCAGTATGGAATTGATTCAATTAGGGAATCATGAATAGTCGTTGG…
		G. crassicaulis	TTTATTCTAACAAATATTACTTTTGAATTGGAAATTTGCTCGATTGGGATCCCTTCAATTTATATAGATTTACAGTTTACGAAGTTATTTCAATTTTTTGATTTACATTTTACCCTCCCAACGGATGTCGAGACAAGAGCACCTTCGTTTCTATAGAACTATAGAAATAGAAGATGATGGATAGAAGAAGGAATACACAGTGGATCGTGTCCTTCAAGTCGCACGTTGCTTTCTACCACATCGTTTCAAACGAAGTTTTACTATAACATTAACATTCTTCTAATTTGGAACCAGTATGGAATTGATTCAATTAGGGAATCATGAATAGTCGTTGGTTCCATTTATGAATAAAGGTGATAAAGGATATGCTCTGGGACGGAAGGATTCGAACCTCCGAAT…
QJcpm10	trnT-psbD	G. dahurica	TCGATAGAGATGAATTGGAACCATTGATCCTTTTTTTATTTCATTTCTTTGACTCCGAAAGAATTTATGGATATTTCCCATTCAATCCTATATTTCTATATTTTATGTATATAGATAGAGTAGGAAAGTAGGAATAAATTGTTATTCTGTTCCTAAAAAGATAAAATAAAAAGAGAAGGGTTTCTTTAAAGTCACAACAGAACATAAGAGCCACTGCTACTAGCTCTCTTTGATTACGATCAATATTACTTTCTAGTGATATTAAGTCTATTACCAAAAATTGTGTATCCAATATTTTTGTTCTGACAGTGAGACAGAAAATGGATGCGAAAGGGAGACTTTCTTTTAAAGTCGCCTGTTTTTTTTATAGAATAAGAATAAATAAATAGAATACTGTAA…
		G. officinalis	TCGATAGAGATGAATTGGAACCATTGATCCTTTTTTTATTTCATTTCTTTGACTCCGAAAGAATTTATGGATATTTCCCATTCAATCCTATATTTCTATATTTTATGTATATAGATAGAGTAGGAAAGTAGGAATAAATTGTTATTCTGTTCCTAAAAAGATAAAATAAAAAGAGAAGGGTTTCTTTAAAGTCACAACAGAACATAAGAGCCACTGCTACTAGCTCTCTTTGATTACGATCAATATTACTTTCTAGTGATATTAAGTCTATTACCAAAAATTGTGTATCCAATATTTTTGTTCTGACAGTGAGACAGAAAATGGATGCGAAAGGGAGACTTTCTTTTAAAGTCGCCTGTTTTTTTTATAGAATAAGAATAAATAAATAGAATACTGTAA…
		G. macrophylla	TCGATAGAGATGAATTGGAACCATTGATCCTTTTTTTATTTCATTTCTTTGACTCCGAAAGAATTTATGGATATTTCCCATTCAATCCTATATTTCTATATTTTATGTATATAGATAGAGTAGGAAAGTAGGAATAAATTGTTATTCTGTTCCTAAAAAGATAAAATAAAAAGAGAAGGGTTTCTTTAAAGTCACAACAGAACATAAGAGCCACTGCTACTAGCTCTCTTTGATTACGATCAATATTACTTTCTAGTGATATTAAGTCTATTACCAAAAATTGTGTATCCAATATTTTTGTTCTGACAGTGAGACAGAAAATGGATGCGAAAGGGAGACTTTCTTTTAAAGTCGCCTGTTTTTTTTATAGAATAAGAATAAATAAATAGAATACTGTAA…
		G. siphonantha	TCGATAGAGATGAATTGGAACCATTGATCCTTTTTTTATTTCATTTCTTTGACTCCGAAAGAATTTATGGATATTTCCCATTCAATCCTATATTTCTATATTTTATGTATATAGATAGAGTAGGAAAGTAGGAATAAATTGTTATTCTGTTCCTAAAAAGATAAAATAAAAAGAGAAGGGTTTCTTTAAAGTCACAACAGAACATAAGAGCCACTGCTACTAGCTCTCTTTGATTACGATCAATATTACTTTCTAGTGATATTAAGTCTATTACCAAAAATTGTGTATCCAATATTTTTGTTCTGACAGTGAGACAGAAAATGGATGCGAAAGGGAGACTTTCTTTTAAAGTCGCCTGTTTTTTTTATAGAATAAGAATAAATAAATAGAATACTGTAA…
		G. straminea	TCGATAGAGATGAATTGGAACCATTGATCCTTTTTTTATTTCATTTCTTTGACTCCGAAAGAATTTATGGATATTTCCCATTCAATCCTATATTTCTATATTTTATGTATATAGATAGAGTAGGAAAGTAGGAATAAATTGTTATTCTGTTCCTAAAAAGATAAAATAAAAAGAGAGGGGTTTCTTTAAAGTCACAACAGAACATAAGAGCCACTGCTACTAGCTCTCTTTGATTACGATCAATATTACTTTCTAGTGATATTAAGTCTATTTAGATGTGTATCCATCAGATCATGGATTCATGTACAAAAAATTGTGTATCCGATATTTTTGTTCTGACAGTGAGACAGAAAATGGATGCGAAAGGGAGACTTTCTTTTAAAGTCGCCTGTTTTTTTT…
		G. robusta	TCGATAGAGATGAATTGGAACCATTGATCCTTTTTTTATTTCATTTCTTTGACTCCGAAAGAATTTATGGATATTTCCCATTCAATCCTATATTTCTATATTTCTATATTTTATGTATATAGATAGAGTAGGAAAGTAGGAATAAATTGTTATTCTGTTCCTAAAAAGATAAAATAAAAAGAGAGGGGTTTCTTTAAAGTCACAACAGAACATAAGAGCCACTGCTACTAGCTCTCTTTGATTACGATCAATATTACTTTCTAGTGATATTAAGTCTATTTAGATGTGTATCCATCAGATCATGGATTCATGTACCAAAAATTGTGTATCCGATATTTTTGTTCTGACAGTGAGACAGAAAATGGATGCGAAAGGGAGACTTTCTTTTAAAGTCGCCTG…
		G. crassicaulis	TCGATAGAGATGAATTGGAACCATTGATCCTTTTTTTATTTCATTTCTTTGACTCCGAAAGAATTTATGGATATTTCCCATTCAATCCTATATTTCTATATTTCTATATTTTATGTATATAGATAGAGTAGGAAAGTAGGAATAAATTGTTATTCTGTTCCTAAAAAGATAAAATAAAAAGAGAAGGGTTTCTTTAAAGTCACAACAGAACATAAGAGCCACTGCTACTAGCTTTCTTTGATTACGATCAATATTACTTTCTAGTGATATTAAGTCTATTTAGATGTGTATCCATCAGATCATGGATTCATGTACCAAAAATTGTGTATCCGATATTTTTGTTCTGACAGTGAGACAGAAAATGGATGCGAAAGGGAGACTTTCTTTTAAAGTCGCCTT…
QJcpm11	rrn5-trnA	G. dahurica	CCGACTTGGTGGTTAACTCTACTGCGGTGACGATACTGTAGGGGAGGTCCTGCGGAAAAATAGCTCGACGCCAGGATGATAAAAAGCTTACCACCTCTCATTATTATTACTTTTTCAATATGAAAACGAAAAAATGAAAAATCAAAGTCTTATTCAAAAACCCCAATTATGACATCCCCTCTCTCCCACTTCACACCTCGGAACGCACCCTTCTTATAGAGTTATAGAGAGAAACGCGCTTTCACACCTTCTTAACCCGAAATGAAATGTTAACCCGAAATGAAATGGCTGGGGAGAGGAAAGGGTCCTTATTTTTGAGGGTACTCCCGGGAACAGATCCACTGGAGACGAGGTGGGGCCTGTAGCTCAGAGGATTAGAGCACGTGGCTACGAACCACG…
		G. officinalis	CCGACTTGGTGGTTAACTCTACTGCGGTGACGATACTGTAGGGGAGGTCCTGCGGAAAAATAGCTCGACGCCAGGATGATAAAAAGCTTACCACCTCTCATTATTATTACTTTTTCAATATGAAAACGAAAAAATGAAAAATCAAAGTCTTATTCAAAAACCCCAATTATGACATCCCCTCTCTCCCACTTCACACCTCGGAACGCACCCTTCTTATAGAGTTATAGAGAGAAACGCGCTTTCACACCTTCTTAACCCGAAATGAAATGTTAACCCGAAATGAAATGGCTGGGGAGAGGAAAGGGTCCTTATTTTTGAGGGTACTCCCGGGAACAGATCCACTGGAGACGAGGTGGGGCCTGTAGCTCAGAGGATTAGAGCACGTGGCTACGAACCACG…
		G. macrophylla	CCGACTTGGTGGTTAACTCTACTGCGGTGACGATACTGTAGGGGAGGTCCTGCGGAAAAATAGCTCGACGCCAGGATGATAAAAAGCTTACCACCTCTCATTATTATTACTTTTTCAATATGAAAACGAAAAAATGAAAAATCAAAGTCTTATTCAAAAACCCCAATTATGACATCCCCTCTCTCCCACTTCACACCTCGGAACGCACCCTTCTTATAGAGTTATAGAGAGAAACGCGCTTTCACACCTTCTTAACCCGAAATGAAATGTTAACCCGAAATGAAATGGCTGGGGAGAGGAAAGGGTCCTTATTTTTGAGGGTACTCCCGGGAACAGATCCACTGGAGACGAGGTGGGGCCTGTAGCTCAGAGGATTAGAGCACGTGGCTACGAACCACG…
		G. siphonantha	CCGACTTGGTGGTTAACTCTACTGCGGTGACGATACTGTAGGGGAGGTCCTGCGGAAAAATAGCTCGACGCCAGGATGATAAAAAGCTTACCACCTCTCATTATTATTACTTTTTCAATATGAAAACGAAAAAATGAAAAATCAAAGTCTTATTCAAAAACCCCAATTATGACATCCCCTCTCTCCCACTTCACACCTCGGAACGCACCCTTCTTATAGAGTTATAGAGAGAAACGCGCTTTCACACCTTCTTAACCCGAAATGAAATGTTAACCCGAAATGAAATGGCTGGGGAGAGGAAAGGGTCCTTATTTTTGAGGGTACTCCCGGGAACAGATCCACTGGAGACGAGGTGGGGCCTGTAGCTCAGAGGATTAGAGCACGTGGCTACGAACCACG…
		G. straminea	CCGACTTGGTGGTTAACTCTACTGCGGTGACGATACTGTAGGGGAGGTCCTGCGGAAAAATAGCTCGACGCCAGGATGATAAAAAGCTTACCACCTCTCATTATTATTACTTTTTCAATATGAAAACGAAAAAATGAAAAATCAAAGTCTTATTCAAAAACCCCAATTATGACATCCCCTCTCTCCCACTTCACACCTCGGAACGCACCCTTCTTATAGAGTTATAGAGAGAAACGCGCTTTCACACCTTCTTAACCCGAAATGAAATGGCTGGGGAGAGGAAAGGGTCCTTATTTTTGAGGGTACTCCCGGGAACAGATCCACTGGAGACGAGGTGGGGCCTGTAGCTCAGAGGATTAGAGCACGTGGCTACGAACCACGGTGTCGGGGGTTCGAATC…
		G. robusta	CCGACTTGGTGGTTAACTCTACTGCGGTGACGATACTGTAGGGGAGGTCCTGCGGAAAAATAGCTCGACGCCAGGATGATAAAAAGCTTACCACCTCTCATTATTATTACTTTTTCAATATGAAAACGAAAAAATGAAAAATCAAAGTCTTATTCAAAAACCCCAATTATGACATCCCCTCTCTCCCACTTCACACCTCGGAACGCACCCTTCTTATAGAGTTATAGAGAGAAACGCGCTTTCACACCTTCTTAACCCGAAATGAAATGGCTGGGGAGAGGAAAGGGTCCTTATTTTTGAGGGTACTCCCGGGAACAGATCCACTGGAGACGAGGTGGGGCCTGTAGCTCAGAGGATTAGAGCACGTGGCTACGAACCACGGTGTCGGGGGTTCGAATC…
		G. crassicaulis	CCGACTTGGTGGTTAACTCTACTGCGGTGACGATACTGTAGGGGAGGTCCTGCGGAAAAATAGCTCGACGCCAGGATGATAAAAAGCTTACCACCTCTCATTATTATTACTTTTTCAATATGAAAACGAAAAAATGAAAAATCAAAGTCTTATTCAAAAACCCCAATTATGACATCCCCTCTCTCCCACTTCACACCTCGGAACGCACCCTTCTTATAGAGTTATAGAGAGAAACGCGCTTTCACACCTTCTTAACCCGAAATGAAATGGCTGGGGAGAGGAAAGGGTCCTTATTTTTGAGGGTACTCCCGGGAACAGATCCACTGGAGACGAGGTGGGGCCTGTAGCTCAGAGGATTAGAGCACGTGGCTACGAACCACGGTGTCGGGGGTTCGAATC…
QJcpm12	psbM-trnD	G. dahurica	CGATGGTTTTGATCGAATCAATATCATGAATAACAATATCTGAATTCTGAAATGAATTCGTCGTCAAAAATGGAATAGTATAACATAGGAAGTTCGTTTAATCATACCGAATCCCAACTTAGATTCCTGATCTAAAAAAAAAAGCCCTTTTTTATCATTCATTTCTGTTCTTTTTTTTTTTTTGTTTACCTTGGCCCCCCCCGGGTAAAATTTCCCAAGAAATTACCAAAGGACCCCCCTCCCCCTTTTTAAACACGTTTCCACCCCCACCAAAAAAAAAACCCCCCCCAAAAAAAAAAGGAATTTTTTCCCATTCCCTGGATTCGGAAAAAACCAAAAAAAAATTTCTGGCTTTTTTGAAAGGGTTAACAACGGGGTTGCCATAAACGGAATAACCCC…
		G. officinalis	CGATGGTTTTGATCGAATCAATATCATGAATAACAATATCTGAATTCTGAAATGAATTCGTCGTCAAAAATGGAATAGTATAACATAGGAAGTTCGTTTAATCATACCGAATCCCAACTTAGATTCCTGATCTAAAAAAAAAGCCCTTTTTTATCATTCATTTCTGTTCTTTTTTTTTTTTGGTTTACCCTGGCCCCCCCCGGGTAAATTTTCCCAAAAAATTACAAAAGAACCCCCTTCCCCCTTTTTAAACACGTTTCCACCCCCACCAAAAAAAAAACCCCCCCCAAAAAAAAAAGGAATTTTTTCCCTTTCCCTGAATTCGGAAAAATCCAAAAAAAAATTTTTGGCTTTTTTGAAAGGGTTAACAACGGGGTTGCCATAAACGGAATAACCCCA…
		G. macrophylla	CGATGGTTTTGATCGAATCAATATCATGAATAACAATATCTGAATTCTGAAATGAATTCGTCGTCAAAAATGGAATAGTATAACATAGGAAGTTCGTTTAATCATACCGAATCCCAACTTAGATTCCTGATCTAAAAAAAAAGCCCTTTTTTATCATTCATTTCTGTTCTTTTTTTTTTTTGGTTTACCCTGGCCCCCCCCGGGTAAATTTTCCCAAAAAATTACAAAAGAACCCCCTTCCCCCTTTTTAAACACGTTTCCACCCCCACCAAAAAAAAAACCCCCCCCAAAAAAAAAAAGAATTCTTTCCCATTCCCTGAATTCGGAAAAAACCAAAAAAAAATTTCTGGCTTTTTTGAAAGGGTTAACAACGGGGTTGCCATAAACGGAATAACCCCA…
		G. siphonantha	CGATGGTTTTGATCGAATCAATATCATGAATAACAATATCTGAATTCTGAAATGAATTCGTCGTCAAAAATGGAATAGTATAACATAGGAAGTTCGTTTAATCATACCGAATCCCAACTTAGATTCCTGATCTAAAAAAAAAAGCCCTTTTTTATCATTCATTTCTGTTCTTTTTTTTTTTTGGTTTACCTTGGCCCCCCCCGGGTAAATTTTCCCAAAAAATTACAAAAGAACCCCCTTCCCCCTTTTTAAACCCGTTTCCACCCCCACCAAAAAAAAAACCCCCCCAAAAAAAAAAAGGAATTTTTTCCCTTTCCCTGAATTCGGAAAAAACCAAAAAAAAATTTCTGGCTTTTTTGAAAGGGTTAACAACGGGGTTGCCCTAAACGGAATAACCCC…
		G. straminea	CGATGGTTTTGATCGAATCAATATCATGAATAACAATATCTGAATTCTGAAATGAATTCGTCGTCAAAAATGGAATAGTATAACATAGGAAGTTCGTTTAATCATACCGAATCCCAACTTAGATTCCTGATCTAAAAAAAAGCCCTTTTTTATCATTCATTTCTGTTCTTTTTTTTTTTTTTGTTTACCCTGGCCCCCCCCGGGTAAATTTTCCCAAAAAATAACCAAAGGACCCCCCTCCCCCTTTATAAACCCTTTTCCACCCCCACCAAAAAAAAAACCCCCCCCAAAAAAAAAGGGAATTCTTTCCCATACCCGGAACCTGGAAAAATTCAAAAAAATATTTTTGTTTTTTTTGAAAGGGTTAACAACGGGGTTACCATAAACGGAAAAACCCCA…
		G. robusta	CGATGGTTTTGATCGAATCAATATCATGAATAACAATATCTGAATTCTGAAATGAATTCGTCGTCAAAAATGGAATAGTATAACATAGGAAGTTCGTTTAATCATACCGAATCCCAACTTAGATTCCTGATCTAAAAAAAAGCCCTTTTTTATCATTCATTCCTGTTCTTTTTTTTTTTTTTTTTGTTTCCCTTGGCCCCCCCCGGGTAAATTTCCCAAAAAAATTACAAAAGAACCCCCCTCCCCCTTTAAAAACACTTTTCCCCCCCCAAAAAAAAAAAAACCCCCCCAAAAAAAAAAGGGATTTTTTTCCCTTTCCCGGAACCGGGAAAAAACCAAAAAAAAATTTCCGCTTTTTTTGAAAGGGTTAACAAGGGGGTAACCAAAAACGGAAAAACC…
		G. crassicaulis	CGATGGTTTGATCGAATCAATATCATGAATAACAATATCTGAATTCTGAAATGAATTCGTCGTCAAAAATGGAATAGTATAACATAGGAAGTTCGTTTAATCATACCGAATCCCAACTTAGATTCCTGATCTAAAAAAAAGCCCTTTTTTTTTTTGGTTTACCTTGGCCCCCCCAGGGTAAATTTCCCCAAAAAATTCCCAAAGAACCCCCCTCCCCCTTTTTAACCCCTTTTCACCCCCCACAAAAAAAAAAACCCCCCCAAAAAAAAAAGGGAATCCTTTCCCATTCCCTGAATTCGGAAAAATCCAAAAAAAAATTTTTGTTTTTTTTGAAATGGTTAACAACGGGGTTGCCCTAACCGGAATAACCCCCTAAAAATTTTTTTTTTTGGAAAAAAA…
QJcpm13	trnS-trnG	G. dahurica	AAAGTAAGGAATATTTATTATATAGATATTATATGGATATGTACACTTTTTAGCAGCAATTTAATTTCGTTAAATAAAAAAGGGGCTGTAAAGTGCCAACAAAACAATATAAAAAAAAGTAAAAAAAAAAAAGGAATTCTCCCTTTTTGATCTTGTTCAAAGGACCCGTCTTTTTTTTTATTACCACGGCCCGGCCTGTTCAGCCCCTAACCGGGCCTTTTTTGTTCAAACAAAAACAATTTTAATTTGAAATTAAATAAATTCTAAATAAATAAAAATGATTTATCTGATTTGGAAAATAGCTTAGTATTCTATAAAATTAAAAAATTAAAAAGCGGAATACAAAATATTCAAGCAAAAATAAAAAGGGAAAAAATGATAGTTCGATATACAAAAACA…
		G. officinalis	AAAGTAAGGAATATTTATTATATAGATATTATATGGATATGTACACTTTTTAGCAGCAATTTAATTTCGTTAAATAAAAAAGGGGCTGTAAAGTGCCAACAAAACAATATAAAAAAAAGTAAAAAAAAAAAAGGAATTCTCCCTTTTTGATCTTGTTCAAAGGACCCGTCTTTTTTTTTATTACCCCGGCCCGGCCTGTTCACCCCCTAACCGGGCCTTTTTTGTTCAAACAAAAACAATTTTAATTTGAAATTAAATAAATTCTAAATAAATAAAAATGATTTATCTGATTTGGAAAATAGCTTAGTATTCTATAAAATTAAAAAATTAAAAAGCGGAATACAAAATATTCAAGCAAAAATAAAAAGGGAAAAAATGATAGTTCGATATACAAAAACA…
		G. macrophylla	AAAGTAAGGAATATTTATTATATAGATATTATATGGATATGTACACTTTTTAGCAGCAATTTAATTTCGTTAAATAAAAAAGGGGCTGTAAAGTGCCAACAAAACAATATAAAAAAAAGTAAAAAAAAAAAAGGAATTCTCCCTTTTTGATCTTGTTCAAAGGACCCGTCTTTTTTTTTATTACCACGGCCCGGCCTGTTCAGCCCCTAACCGGGCCTTTTTTGTTCAAACAAAAACAATTTTAATTTGAAATTAAATAAATTCTAAATAAATAAAAATGATTTATCTGATTTGGAAAATAGCTTAGTATTCTATAAAATTAAAAAATTAAAAAGCGGAATACAAAATATTCAAGCAAAAATAAAAAGGGAAAAAATGATAGTTCGATATACAAAAACA…
		G. siphonantha	AAAGTAAGGAATATTTATTATATAGATATTATATGGATATGTACACTTTTTAGCAGCAATTTAATTTCGTTAAATAAAAAAGGGGCTGTAAAGTGCCAACAAAACAATATAAAAAAAAGTAAAAAAAAAAAAGGAATTCTCCCTTTTTGATCTTGTTCAAAGGACCCGTCTTTTTTTTTATTACCACGGCCCGGCCTGTTCACCCCCTAACCGGGCCTTTTTTGTTCAAACAAAAACAATTTTAATTTGAAATTAAATAAATTCTAAATAAATAAAAATGATTTATCTGATTTGGAAAATAGCTTATTATTCTATAAAATTAAAAAATTAAAAAGCGGAATACAAAATATTCAAGCAAAAATAAAAAGGGAAAAAATGATAGTTCGATATACAAAAACA…
		G. straminea	AAAGTAAGGAATATTTATTATATAGATATTATATGGATATGTACACATAGATATTATATGGATATGTACACTTTTTAGCAGCAATTTAATTTCGTTAAATAAAAAAGGGGCTGTAAAGTGCCAACAAAACAATATAAAAAAAAGTAAAAAAAAAAAAAAGGAATTCCCCCTTTTTGATCTTGTTCAAAGGACCCGTCTTTTTTTTTATTACCCCGGCCCGGCCGGTTCACCCCCTAACCGGGCCTTTTTTGTTCAAACAAAAACAATTTTAATTTGAAATAAAATAAATCCTAAAAAAAAAAAAAGGATTTATCTGATTTGAAAAATACCTAATTATTCTATAAAATTAAAAAATTAAAAAGCGAAATACAAAATATTCAAGCAAAAATAAAAAGGGAA…
		G. robusta	AAAGTAAGGAATATTTATTATATAGATATTATATGGATATGTACACATAGATATTATATGGATATGTACACTTTTTAGCAGCAATTTAATTTCGTTAAATAAAAAAGGGGCTGTAAAGTGCCAACAAAACAATATAAAAAAAAGTAAAAAAAAAAAAAAAGGAATTCCCCCTTTTTGATCTTGTTCAAGGGACCCGCCTTTTTTTTTTTTCCCCGGGCCGGCCCGGTCCCCCCCCAACCCGGCCTTTTTTTGTTCAAACAAAAACATTTTAAATTTAAAATAAAAAAAATCCAAAAAAAAAAAAAAGGATTTACCGAATTGGAAAAAAACCTAATTATCCTAAAAAATTAAAAATTTAAAAAGGGAAATACAAAATTTTCAACCAAAAATAAAAGGGGA…
		G. crassicaulis	AAAGTAAGGAATATTTATTATATAGATATTATATGGATATGTACACTTTTTAGCAGCAATTTAATTTCGTTAAATAAAAAAGGGGCTGTAAAGTGCCAACAAAACAATATAAAAAAAAGTAAAAAAAAAAAAGGGATTTCCCCCTTTTTGATCTGGTTCAAGGGACCCGCTTTTTTTTTTTTACCCCGGCCCGGCCGGTTCCCCCCCAACCCGGCCCTTTTTTGTCCAAACAAAAACATTTTTATTTTGAATTAAAAAAATTCCAAAAAAAAAAAAAAGGATTTTCCTGATTGGAAAAAAACCTAATTTTTCTAAAAAATTAAAAATTTAAAAAGGGAAAAACAAAATTTCCAACCAAAAAAAAAAGGGGAAAAAAGGATATTTCAATATACAAAAACA…
QJcpm14	trnS-psbZ	G. dahurica	GACTTCTTTATTTTATTCCTCTAAATAGACCACGGCCATAGGGGTGAATACCACTACTATCTATAGAAAGACCTCGGGACCGGCGGATCCATATATCCGTGTATATGCTCCAGCGCGCCCTTATGTACGAAGAAAGTGGTAAAGGATTAGTCATAAGTCATACAGAATCAATGGATTCATGAGAAAGTAAAATCCCTCAACGGTGTATTGTGACTAATAGAGGGATCAAATGGTATAGTTCATTTGTTGGTAGCTTGGAGGAATAAAAGCATGACTCTTGCTTTTCAATTGGCTGTTTTTGCATTAATTACTATTTCATCAATCTTATTGATTAGCGTGCCTGTTGTATTTGCTTCTCCTGATGGTTGGTTGAGTAACAAAAATGTTATATTTTCCGGT…
		G. officinalis	GACTTCTTTATTTTATTCCTCTAAATAGACCACGGCCATAGGGGTGAATACCACTACTATCTATAGAAAGACCTCGGGACCGGCGGATCCATATATCCGTGTATATGCTCCAGCGCGCCCTTATGTACGAAGAAAGTGGTAAAGGATTAGTCATAAGTCATACAGAATCAATGGATTCATGAGAAAGTAAAATCCCTCAACGGTGTATTGTGACTAATAGAGGGATCAAATGGTATAGTTCATTTGTTGGTAGCTTGGAGGAATAAAAGCATGACTCTTGCTTTTCAATTGGCTGTTTTTGCATTAATTACTATTTCATCAATCTTATTGATTAGCGTGCCTGTTGTATTTGCTTCTCCTGATGGTTGGTTGAGTAACAAAAATGTTATATTTTCCGGT…
		G. macrophylla	GACTTCTTTATTTTATTCCTCTAAATAGACCACGGCCATAGGGGTGAATACCACTACTATCTATAGAAAGACCTCGGGACCGGCGGATCCATATATCCGTGTATATGCTCCAGCGCGCCCTTATGTACGAAGAAAGTGGTAAAGGATTAGTCATAAGTCATACAGAATCAATGGATTCATGAGAAAGTAAAATCCCTCAACGGTGTATTGTGACTAATAGAGGGATCAAATGGTATAGTTCATTTGTTGGTAGCTTGGAGGAATAAAAGCATGACTCTTGCTTTTCAATTGGCTGTTTTTGCATTAATTACTATTTCATCAATCTTATTGATTAGCGTGCCTGTTGTATTTGCTTCTCCTGATGGTTGGTTGAGTAACAAAAATGTTATATTTTCCGGT…
		G. siphonantha	GACTTCTTTATTTTATTCCTCTAAATAGACCACGGCCATAGGGGTGAATACCACTACTATCTATAGAAAGACCTCGGGACCGGCGGATCCATATATCCGTGTATATGCTCCAGCGCGCCCTTATGTACGAAGAAAGTGGTAAAGGATTAGTCATAAGTCATACAGAATCAATGGATTCATGAGAAAGTAAAATCCCTCAACGGTGTATTGTGACTAATAGAGGGATCAAATGGTATAGTTCATTTGTTGGTAGCTTGGAGGAATAAAAGCATGACTCTTGCTTTTCAATTGGCTGTTTTTGCATTAATTACTATTTCATCAATCTTATTGATTAGCGTGCCTGTTGTATTTGCTTCTCCTGATGGTTGGTTGAGTAACAAAAATGTTATATTTTCCGGT…
		G. straminea	GACTTCTTTATTTTATTCCTCTAAATAGACCACGGCCATAGGGGTGAATACCACTACTATCTATAGAAAGACCTCGGGACCGGCGGATCCATATATCCGTGTATATGCTCCAGCGCGCCCTTATGTACGAAGAAAGTGGTAAAGGATTAGTCATAAGTCATACAGAATCAATGGATTCATGAGAAAGTAAAATCCCTCAACGGTGTATTGTGACTAATAGAGGGATCAAATGGTATAGTTCATTTGTTGGTAGCTTGGAGGAATAAAAGCATGACTCTTGCTTTTCAATTGGCTGTTTTTGCATTAATTACTATTTCATCAATCTTATTGATTAGCGTGCCTGTTGTATTTGCTTCTCCTGATGGTTGGTTGAGTAACAAAAATGTTATATTTTCCGGT…
		G. robusta	GACTTCTTTATTTTATTCCTCTAAATAGACCACGGCCATAGGGGTGAATACCACTACTATCTATAGAAAGACCTCGGGACCGGCGGATCCATATATCCGTGTATATGCTCCAGCGCGCCCTTATGTACGAAGAAAGTGGTAAAGGATTAGTCATAAGTCATACAGAATCAATGGATTCATGAGAAAGTAAAATCCCTCAACGGTGTATTGTGACTAATAGAGGGATCAAATGGTATAGTTCATTTGTTGGTAGCTTGGAGGAATAAAAGCATGACTCTTGCTTTTCAATTGGCTGTTTTTGCATTAATTACTATTTCATCAATCTTATTGATTAGCGTGCCTGTTGTATTTGCTTCTCCTGATGGTTGGTTGAGTAACAAAAATGTTATATTTTCCGGT…
		G. crassicaulis	GACTTCTTTATTTTATTCCTCTAAATAGACCACGGCCATAGGGGTGAATACCACTACTATCTATAGAAAGACCTCGGGACCGGCGGATCCATATATCCGTGTATATGCTCCAGCGCGCCCTTTTGGGTTGTGAAATAAACAAAAATTTCATTTCCCCCTCCCTCGACCCCATGTACGAAGAAAGTGGTAAAGGATTAGTCATAAGTCATACAGAATCAATGGATTCATGAGAAAGTAAAATCCCTCAACGGTGTATTGTGACTAATAGAGGGATCAAATGGTATAGTTCATTTGTTGGTAGCTTGGAGGAATAAAAGCATGACTCTTGCTTTTCAATTGGCTGTTTTTGCATTAATTACTATTTCATCAATCTTATTGATTAGCGTGCCTGTTGTATTT…
QJcpm15	accD-psbI	G. dahurica	TAAAACAGTACCCGAGGGTTCGCAATCGGCTGAATATTTATTCGAGAAGGGCTTATTTGACCTAATTGTATCACGTAATCTTTTAAAAAGCGTTTTGAGTGAGTTATTTAAGTTCCACGCTTTCTTTCCTTTGAATCAAAATGGAATAGAGACGAAATAAAATAGAACACTAAGCTCAATTATTTGTAGCAAATGGGTAGTTAGTTTGTCAGAATCAAATAAAAAAGGAGAATTGTCTTTCGTCACATAAGATCGAATTGTATAAAGAAACAAAAGTTATTGAAATTGAGCATTAAATGAGTTATTACAGTCATAATAATGAGCTTCATTCTTTTCTAATTTTATAAATTCTAATTATTATAAGATATATTGAATTTTGAAATAATAATATAATAATAA…
		G. officinalis	TAAAACAGTACCCGAGGGTTCGCAATCGGCTGAATATTTATTCGAGAAGGGCTTATTTGACCTAATTGTATCACGTAATCTTTTAAAAAGCGTTTTGAGTGAGTTATTTAAGTTCCACGCTTTCTTTCCTTTGAATCAAAATGGAATAGAGACGAAATAAAATAGAACACTAAGCTCAATTATTTGTAGCAAATGGGTAGTTAGTTTGTCAGAATCAAATAAAAAAGGAGAATTGTCTTTCGTCACATAAGATCGAATTGTATAAAGAAACAAAAGTTATTGAAATTGAGCATTAAATGAGTTATTACAGTCATAATAATGAGCTTCATTCTTTTCTAATTTTATAAATTCTAATTATTATAAGATATATTGAATTTTGAAATAATAATATAATAATAA…
		G. macrophylla	TAAAACAGTACCCGAGGGTTCGCAATCGGCTGAATATTTATTCGAGAAGGGCTTATTTGACCTAATTGTATCACGTAATCTTTTAAAAAGCGTTTTGAGTGAGTTATTTACGTTCCACGCTTTCTTTCCTTTGAATCAAAATGGAATAGAGACGAAATAAAATAGAACACTAAGCTCAATTATTTGTAGCAAATGGGTAGTTAGTTTGTCAGAATCAAATAAAAAAGGAGAATTGTCTTTCGTCACATAAGATCGAATTGTATAAAGAAACAAAAGTTATTGAAATTGAGCATTAAATGAGTTATTACAGTCATAATAATGAGCTTCATTCTTTTCTAATTTTATAAATTCTAATTATTATAAGATATATTGAATTTTGAAATAATAATATAATAATAA…
		G. siphonantha	TAAAACAGTACCCGAGGGTTCGCAATCGGCTGAATATTTATTCGAGAAGGGCTTATTTGACCTAATTGTATCACGTAATCTTTTAAAAAGCGTTTTGAGTGAGTTATTTAAGTTCCACGCTTTCTTTCCTTTGAATCAAAATGGAATAGAGACGAAATAAAATAGAACACTAAGCTCAATTATTTGTAGCAAATGGGTAGTTAGTTTGTCAGAATCAAATAAAAAAGGAGAATTGTCTTTCGTCACATAAGATCGAATTGTATAAAGAAACAAAAGTTATTGAAATTGAGCATTAAATGAGTTATTACAGTCATAATAATGAGCTTCATTCTTTTCTAATTTTATAAATTCTAATTATTATAAGATATATTGAATTTTGAAATAATAATATAATAATAA…
		G. straminea	TAAAACAGTACCCGAGGGTTCGCAATCGGCTGAATATTTATTCGAGAAGGGCTTATTTGACCTAATTGTATCACGTAATCTTTTAAAAAGCGTTTTGAGTGAGTTATTTAAGTTCCACGCTTTCTTTCCTTTGAATCAAAATGGAATAGAGACGAAATAAAATAGAACACTAAGCTCAATTATTTGTAGCAAATGGGTAGTTAGTTTGTCAGAATCAAATAAAAAAGGAGAATTGTCTTTCGTCACATAAGATCGAATTGTATAAAGAAACAAAAGTTATTGAAATTGAGCATTAAATGAGTTATTACAGTCATAATAATGAGCTTCATTCTTTTCTAATTTTATAAATTCTAATTATTATAAGATATATTGAATTTTGAAATAATAATATAATAATAA…
		G. robusta	TAAAACAGTACCCGAGGGTTCGCAATCGGCTGAATATTTATTCGAGAAGGGCTTATTTGACCTAATTGTATCACGTAATCTTTTAAAAAGCGTTTTGAGTGAGTTATTTAAGTTCCACGCTTTCTTTCCTTTGAATCAAAATGGAATAGAGACGAAATAAAATAGAACACTAAGCTCAATTATTTGTAGCAAATGGGTAGTTAGTTTGTCAGAATCAAATAAAAAAGGAGAATTGTCTTTCGTCACATAAGATCGAATTGTATAAAGAAACAAAAGTTATTGAAATTGAGCATTAAATGAGTTATTACAGTCATAATAATGAGCTTCATTCTTTTCTAATTTTATAAATTCTAATTATTATAAGATATATTGAATTTTGAAATAATAATATAATAATAA…
		G. crassicaulis	TAAAACAGTACCCGAGGGTTCGCAATCGGCTGAATATTTATTCGAGAAGGGCTTATTTGACCTAATTGTATCACGTAATCTTTTAAAAAGCGTTTTGAGTGAGTTATTTAAGTTCCACGCTTTCTTTCCTTTGAATCAAAATGGAATAGAGACGAAATAAAATAGAACACTAAGCTCAATATCAAATAAAAAAGGAGAATTGTCTTTCGTCACATAAGATCGAATTGTATAAAGAAGCAAAAGTTATTGAAATTGAGCATTAAATGAGTTATTACAGTCATAATAATGAGCTTCATTCTTTTCTAATTTTATAAATTCTAATTATTATAAGATATATTGAATTTTGAAATAATAATATAATAATAACATAACAGGTACAAACAATAAATCGAGGTACCC…
QJcpm16	trnK-rps16	G. dahurica	TCTATAAGATTCGATAATGGGTAGATAATAAAAAGAAGTATAGATACAATCTGAATAAAAATAAATTTAACAAAGAGATTCAAAAAAAGCAATTAAATCCTTGAACTAACAAACAAACCGCAAAAACATACTTTGTTTTAATTCGAAAGAAAAAAAGAAATAAAAATACAAAAAATTATCAGATAAAATTAGACAAAAAAAAAAAAAAAAAAAAAATATAAAAGGGAAAAATTAAATGGGCAAGGGTTCTTTTACCACCTTTTTAAAAAAAAAAAAAAAATTTTCCTTACCCCTCGGGGACCAAAAACCCCCCCTTTGGAAGGAAAAAAAAAAAAAAAAAACCCCATTGGAGGGAAAAAAAAAAACCCACTTGGCTTTACCCCAAAAATTTATTTTGGT…
		G. officinalis	TCTATAAGATTCGATAATGGGTAGATAATAAAAAGAAGTATAGATACAATCTGAATAAAAATAAATTTAACAAAGAGATTCAAAAAAAGCAATTAAATCCTTGAACTAACAAACAAACCGCAAAAACATACTTTGTTTTAATTCGAAAGAAAAAAAGAAATAAAAATACAAAAAATTATCAGATAAAATTAGACAAAAAAAAAAAAAAAAAAAAATATAAAAAGGAAAAATTAAAAGGGCAAGGGTTCCTTTACCACCTTTTTCAAAAAACCAAAAAAATTTTCCTTACCCCCCGGGGACCAAAAAACCCCCCTTTTGAAGGAAAAAAAAAAAAAAACAACCTCATAGGCGGAAAAAAAAAAAACCCACTTGGATTAACCCCAATAATTTATTTTGGTC…
		G. macrophylla	TCTATAAGATTCGATAATGGGTAGATAATAAAAAGAAGTATAGATACAATCTGAATAAAAATAAATTTAACAAAGAGATTCAAAAAAAGCAATTAAATCCTTGAACTAACAAACAAACCGCAAAAACATACTTTGTTTTAATTCGAAAGAAAAAAAGAAATAAAAATACAAAAAATTATCAGATAAAATTAGACAAAAAAAAAAAAAAAAAAAAATAGAAAATGGAAAAATTTAAAGGGCAAAGGTTCCTTTACCACCTTTTTCAAAAAAAAAAAAAAATTTTTCTTACCCCCCAGGGACCAAAAAACCCCCCTTTTGAAGGAAAAAAAAAAAAAAAAAACCTCATAGGAGGGAAAAAAAAAAACCCACTTGGATTTACCCCAATAAATTATTTTGGTC…
		G. siphonantha	TCTATAAGATTCGATAATGGGTAGATAATAAAAAGAAGTATAGATACAATCTGAATAAAAATAAATTTAACAAAGAGATTCAAAAAAAGCAATTAAATCCTTGAACTAACAAACAAACCGCAAAAACATACTTTGTTTTAATTCGAAAGAAAAAAAGAAATAAAAATACAAAAAATTATCAGATAAAATTAGACAAAAAAAAAAAAAAAAAAAAAAAATAAAATGGTAAAATTAAAAGGGCAAGGGTCCTTTTATCACCTTTTTAAAAAAAAAAAAAAAATTTTTCTTACCCCCCGGGGACAAAAAAACCCCCCTTTGAAAGGAAAAAAAAAAAAAAAAAACCCCATAGGAGGAAAAAAAAAAAACCCACTTGGATTTACCCGAAAAATTAATTTTGGT…
		G. straminea	TCTATAAGATTCGATAATGGGTAGATAATAAAAAGAAGTATAGATACAATCTGAATAAAAATAAATTTAACAAAGAGATTCAAAAAAAGCAATTAAATCCTTGAACTAACAAACAAACCGCAAAAACATACTTTGTTTTAATTCGAAAGAAAAAAAGAAATAAAAATACAAAAAATTATCAGATAAAATTAGACAAAAAAAAAAAAAAAAAAAAAATATAAAAGGGAAAAATTTTATGGGCAAGGGTTCTCTTACCACCTTTTTCAAAAAAACAAAAAAATTTTCCTAACCCCCCGGGGACCAAAAAACCCCCCTTTGGAAGGAAAAAAAAAAAAAAACAACCTCAAAGGAGGAAAAAAAAAAAACCCACTTGGATTTACCCCAAAAATTTATTTTGGT…
		G. robusta	TCTATAAGATTCGATAATGGGTAGATAATAAAAAGAAGTATAGATACAATCTGAATAAAAATAAATTTAACAAAGAGATTCAAAAAAAGCAATTAAATCCTTGAACTAACAAACAAACCGCAAAAACATACTTTGTTTTAATTCGAAAGAAAAAAAGAAATAAAAATACAAAAAATTATCAGATAAAATTAGACAAAAAAAAAAAAAAAAAAAAAAATAAAAAAGGGAAAAATTTTTGGGGAAAGGGTCCTTTTACCACCTTTTCAAAAAAAAAAAAAAATTTTTCCTTACCCCCCGGGGACAAAAAACCCCCCCTTTGAAGGAAAAAAAAAAAAAAAAAAACCCCATTGAAGGAAAAAAAAAAACCCCACTTGGCTTTACCCGAAAAATTTATTTTGG…
		G. crassicaulis	TCTATAAGATTCGATAATGGGTAGATAATAAAAAGAAGTATAGATACAATCTGAATAAAAATAAATTTAACAAAGAGATTCAAAAAAAGCAATTAAATCCTTGAACTAACAAACAAACCGCTAAAATTAGACAAAAAAAAAAAAAAAAAAATAGTAAAAGGTAAAATTTTATAGGCAAAGGTTCTCTTATCAACCTTTTCAATAAAACAAAAAAATTTTTCTTATCACTCAGGGATCAAAAAACCCCCCTTTTGAAGGAAAAAAAGAAAAAAACAAACTCAAATGACGAAAATAAATAAACCCAATTTGACTTATCACAATAAATTAAATTGGTTCAAAACCCGGTTGCCAATAAAAAAAAAAAAGGGGGAAACTCAAAAAAATTCATTTGATTTTCAC…
